1 **Title: Endosidin20 targets cellulose synthase catalytic domain to inhibit cellulose**  
2 **biosynthesis**

3 **Short title: Endosidin20 targets cellulose synthase**

4 Lei Huang<sup>1,2</sup>, Xiaohui Li<sup>1,2</sup>, Weiwei Zhang<sup>2,3</sup>, Nolan Ung<sup>4</sup>, Nana Liu<sup>1,2</sup>, Xianglin Yin<sup>5,6</sup>,  
5 Yong Li<sup>5,6</sup>, Robert E. Mcewan<sup>2,7</sup>, Brian Dilkes<sup>2,7</sup>, Mingji Dai<sup>5,6</sup>, Glenn R. Hicks<sup>4,8</sup>,  
6 Natasha V. Raikhel<sup>4</sup>, Christopher J. Staiger<sup>1,2,3</sup>, Chunhua Zhang<sup>1,2,\*</sup>

7

8 <sup>1</sup> Department of Botany and Plant Pathology, Purdue University, 915 W. State St., West  
9 Lafayette, IN, 47907

10 <sup>2</sup> Center for Plant Biology, Purdue University, 610 Purdue Mall, West Lafayette, IN,  
11 47907

12 <sup>3</sup> Department of Biological Sciences, Purdue University, 915 W. State St., West  
13 Lafayette, IN, 47907

14 <sup>4</sup> Department of Botany and Plant Sciences, University of California, 900 University Ave.  
15 Riverside, CA, 92521

16 <sup>5</sup> Department of Chemistry, Purdue University, 720 Clinic Drive, West Lafayette, IN,  
17 47907

18 <sup>6</sup> Center for Cancer Research, Purdue University, 201 S University St, West Lafayette,  
19 IN 47906

20 <sup>7</sup> Department of Biochemistry, Purdue University, 175 South University Street, West  
21 Lafayette, IN, 47907

22 <sup>8</sup> Uppsala Bio Center, Swedish University of Agricultural Sciences, Uppsala SE-75007,  
23 19 Sweden

24 \* To whom the correspondence should be addressed.

25 The author(s) responsible for distribution of materials integral to the findings presented  
26 in this article in accordance with the policy described in the Instructions for Authors  
27 ([www.plantcell.org](http://www.plantcell.org)) is: Chunhua Zhang ([zhang150@purdue.edu](mailto:zhang150@purdue.edu)).

28 **One sentence summary:** Endosidin20 targets cellulose synthase at the catalytic site to  
29 inhibit cellulose synthesis and the inhibition of catalytic activity reduces cellulose  
30 synthase complex delivery to the plasma membrane.

31

32 **Abstract**

33 Cellulose is synthesized by rosette structured cellulose synthase (CESA) complexes  
34 (CSCs), each of which is composed of multiple units of CESAs in three different  
35 isoforms. CSCs rely on vesicle trafficking for delivery to the plasma membrane where  
36 they catalyze cellulose synthesis. Although the rosette structured CSCs were observed  
37 decades ago, it remains unclear what amino acids in plant CESA that directly participate  
38 in cellulose catalytic synthesis. It is also not clear how the catalytic activity of CSCs  
39 influences their efficient transport at the subcellular level. Here we report  
40 characterization of the small molecule Endosidin20 (ES20) and present evidence that it  
41 represents a new CESA inhibitor. We show data from chemical genetic analyses,  
42 biochemical assays, structural modeling, and molecular docking to support our  
43 conclusion that ES20 targets the catalytic site of Arabidopsis CESA6. Further, chemical  
44 genetic analysis reveals important amino acids that potentially form the catalytic site of  
45 plant CESA6. Using high spatiotemporal resolution live-cell imaging, we found that  
46 inhibition of CSC catalytic activity by inhibitor treatment, or by creating missense  
47 mutation at amino acids in the predicted catalytic site, causes reduced efficiency in CSC  
48 transport to the plasma membrane. Our results show that the catalytic activity of plant  
49 CSCs is integrated with subcellular trafficking dynamics.

50

## 51 **INTRODUCTION**

52 Cellulose is a polymer of  $\beta$ -1,4-D-glucose that serves as an essential cell wall  
53 component for anisotropic growth of plant cells. Cellulose is synthesized at the plasma  
54 membrane (PM) by a cellulose synthase complex (CSC) comprising a rosette of  
55 subunits in a hexagonal array with 25-nm diameter that can be observed in many  
56 different plant cell types (Mueller et al., 1976; Giddings et al., 1980; Mueller and Brown,  
57 1980). Each CSC is predicted to contain at least 18 monomeric cellulose synthases  
58 (CESAs) of three different isoforms in a 1:1:1 molar ratio (Pear et al., 1996; Arioli et al.,  
59 1998; Doblin et al., 2002; Persson et al., 2007; Fernandes et al., 2011; Newman et al.,  
60 2013; Gonneau et al., 2014; Hill et al., 2014). Freeze-fracture electron microscopy  
61 analysis reveals that CSCs are localized to the Golgi, Golgi-derived vesicles and the  
62 PM, indicating CSCs are transported through the vesicle trafficking pathway (Haigler  
63 and Brown, 1986). Live cell imaging of CSCs using functional fluorescence-tagged  
64 CESA provides further compelling evidence that CSCs are localized to the Golgi/trans-  
65 Golgi network (TGN), small CESA-containing compartments (SmaCCs)/microtubule-  
66 associated cellulose synthase compartments (MASCs), and PM (Paredez et al., 2006;  
67 Crowell et al., 2009; Gutierrez et al., 2009; Zhang et al., 2019). PM-localized CSCs  
68 show bidirectional motility and the velocity is related to cellulose polymerization process  
69 (Paredez et al., 2006; Crowell et al., 2009; Gutierrez et al., 2009; Fujita et al., 2013).

70

71 Precise CSC delivery to the PM requires the coordinated function of multiple cellular  
72 machineries including microtubules, actin, and general exocytosis machinery (Paredez  
73 et al., 2006; Crowell et al., 2009; Farquharson, 2009; Gutierrez et al., 2009;  
74 Sampathkumar et al., 2013; Bashline et al., 2014; McFarlane et al., 2014; Lei et al.,

75 2015; Luo et al., 2015; Zhu et al., 2018; Zhang et al., 2019). CSCs in the Golgi and  
76 SmaCCs require actin cytoskeleton for long and short distance cellular transport  
77 (Crowell et al., 2009; Gutierrez et al., 2009; Sampathkumar et al., 2013). SmaCCs that  
78 are close to the PM interact with microtubules and CELLULOSE SYNTHASE  
79 INTEACTIVE 1 (CSI1) for targeted delivery to the PM (Farquharson, 2009; Gutierrez et  
80 al., 2009; Li et al., 2012). CSCs also require the conserved exocyst complex,  
81 PATROL1, actin, and myosin XI for tethering and fusion to the PM (Sampathkumar et  
82 al., 2013; Zhu et al., 2018; Zhang et al., 2019). There are also new cellular components,  
83 such as STELLO and SHOU4, that regulate CSC delivery to the PM through molecular  
84 mechanisms that require further investigation (Zhang et al., 2016b; Polko et al., 2018).  
85 High resolution structural analysis has defined key amino acids in the catalytic site of  
86 *Rhodobacter sphaeroides* cellulose synthase (RsBcsA) (Morgan et al., 2013;  
87 Omadjela et al., 2013; Morgan et al., 2014; Morgan et al., 2016). However, plant CESAs  
88 contain plant-conserved sequence (P-CR) and class-specific region (CSR) in the  
89 cytoplasmic domain that are not present in bacterial Cesa (Pear et al., 1996; Vergara  
90 and Carpita, 2001). The presence of P-CR and CSR indicates that the plant CESA  
91 catalytic site may have different amino acid composition compared with the bacterial  
92 Cesa catalytic site. So far, high resolution structures for CSCs and individual CESAs  
93 are not available to define amino acids that participate in cellulose catalytic synthesis. It  
94 also remains inconclusive whether the catalytic site contains information that influences  
95 CSC delivery to the PM.

96

97 Small molecule inhibitors of CESA, for example isoxaben and dichlorobenzonitrile  
98 (DCB), have proven useful in understanding the molecular functions and dynamics of  
99 CSCs (Montezinos and Delmer, 1980; Heim et al., 1989; Scheible et al., 2001; Desprez  
100 et al., 2002; DeBolt et al., 2007b; Brabham et al., 2014; Worden et al., 2015; Tateno et  
101 al., 2016; Tran et al., 2018). However, there are limitations to using these small  
102 molecules because the mechanisms of how these inhibitors target CESAs directly are  
103 not known. Here, we report the characterization of a new small molecule, Endosidin20  
104 (ES20), that inhibits cellulose synthesis by directly targeting Arabidopsis CESA6. We  
105 use chemical genetic analyses, structural modeling, molecular docking and biochemical  
106 assays to show that ES20 targets CESA6 at the catalytic site that requires proper  
107 functions of at least 18 amino acids in the cytoplasmic domain. Further, we analyzed the  
108 cellular localization and trafficking dynamics of CSCs in ES20-treated seedlings and  
109 CSCs that contain missense mutations at the catalytic site of CESA6. We found that the  
110 trafficking dynamics of CSC is altered after ES20 treatment or when the catalytic site is  
111 mutated, indicating that the catalytic site of CSC contains information that affects their  
112 efficient subcellular transport.

113

## 114 **RESULTS**

### 115 **Endosidin20 inhibits cellulose synthesis**

116 Endosidin20 (ES20) (Figure 1A) was initially found to inhibit pollen tube growth without  
117 interfering with the trafficking of two types of cargo proteins, PIN2 auxin transporter and  
118 BRI1 brassinosteroid receptor, that are delivered to and maintained at the PM (Figure  
119 1B) (Drakakaki et al., 2011). ES20 also did not disrupt the localization of two other

120 plasma membrane proteins, ROP6 and PIP2a, or general marker proteins for  
121 endoplasmic reticulum (ER) (GFP-HDEL), Golgi (YFP-Got1p), and trans-Golgi  
122 Network/Early Endosomes (TGN/EEs) (VHA-a1-GFP) (Figure 1B). We found that ES20  
123 induced plant growth phenotypes similar to cellulose synthase mutants or wildtype  
124 plants grown in the presence of cellulose synthase inhibitor (Arioli et al., 1998; DeBolt et  
125 al., 2007a). When grown in the presence of ES20, dark-grown hypocotyls of  
126 *Arabidopsis* wildtype (ecotype Col-0) seedlings became shorter and wider in an ES20  
127 dose-dependent manner (Figure 2A-2E). The epidermal cells of hypocotyls grown in the  
128 presence of ES20 were swollen (Figure 2F-2H). In addition to these hypocotyl  
129 phenotypes, ES20 inhibited root growth in a dose-dependent manner (Figure 2I, 2J).  
130 When treated with ES20 overnight, the root tip region of wildtype plants was swollen  
131 and root elongation was significantly inhibited compared to mock-treated roots (Figure  
132 2K-2N). Similar to hypocotyl epidermal cells, epidermal cells from the root elongation  
133 zone were markedly swollen after ES20 treatment, which was reflected by a significantly  
134 decreased cell length and a significantly increased cell width (Figure 2O-2Q). Swollen  
135 cells and organs in plants are often caused by direct or indirect disruption of cell wall  
136 biosynthesis or organization such as those caused by CESA-deficient mutants or in  
137 wildtype plants treated with inhibitors of cellulose synthesis or microtubule organization  
138 (Baskin et al., 1994; Arioli et al., 1998; Fagard et al., 2000; Burn et al., 2002; Desprez et  
139 al., 2002; Daras et al., 2009). The observation of reduced cell elongation and inhibition  
140 of anisotropic growth motivated us to test the effects of ES20 on cellulose synthesis. We  
141 found that ES20 reduced the crystalline cellulose content of both dark-grown hypocotyls  
142 and light-grown roots of wildtype seedlings in a dose-dependent manner (Figure 2R,

143 2S). These results indicate that ES20 could inhibit plant growth by affecting cellulose  
144 biosynthesis. We also found that lignin and callose were accumulated at higher levels  
145 compared with control seedlings grown in the presence of DMSO (Figure 2T-U), similar  
146 to previous reports for plants with cellulose synthesis deficiency caused by mutation or  
147 inhibitors (Desprez et al., 2002; Cano-Delgado et al., 2003; Sampathkumar et al., 2013).

148

### 149 **Mutations at the CESAs cause reduced sensitivity to ES20**

150 To identify the cellular and molecular pathways that are targeted by ES20, we  
151 performed a chemical genetic screen for mutants with reduced sensitivity to this growth  
152 inhibitor. We screened about 500,000 M2 seedlings from ethyl methanesulfonate (EMS)  
153 mutagenized populations on 5  $\mu$ M ES20 and identified seedlings with longer roots than  
154 control plants that were not mutagenized. Selected M2 seedlings were transferred to  
155 soil to produce the M3 generation. After re-testing the seeds from the M3 generation,  
156 we confirmed a total of 45 individual lines that had reduced sensitivity to ES20 for  
157 growth. We refer to these alleles as *ES20 RESISTANT* or *es20r* genes. After high-  
158 throughput whole genome sequencing of pooled seedlings from mapping populations,  
159 we found some of these individual lines carried the same mutation. We obtained 15  
160 different mutant alleles carrying either C-T or G-A mutations in *CESA6* and these  
161 mutants were named *es20r1–es20r15*. Due to the number of mutants we found in  
162 *CESA6* and associated resources available in *Arabidopsis*, we decided to use these  
163 mutants to further analyze the mode of action of ES20 and the importance of mutated  
164 amino acids for *CESA6* function. We backcrossed the mutants and consistently  
165 detected reduced sensitivity of these mutants to ES20 for light-grown root and dark-



166 grown hypocotyl growth (Figure 3A, 3B; Supplemental Figure, Figure S1; Supplemental  
167 Figure, Figure S2). By further analyzing the *es20r/cesa6* mutations, we found that 12 of  
168 them led to missense mutations in amino acids located at the predicted central  
169 cytoplasmic domain, two caused missense mutations in amino acids located at the  
170 predicted transmembrane domains, and one was mutated in the cytosolic domain close  
171 to the fifth predicted transmembrane domain (Figure 3C). To confirm that the mutations  
172 in *CESA6* caused reduced sensitivity to ES20, we performed genetic complementation  
173 experiments. We cloned the genomic content of *CESA6* and inserted a YFP tag at the  
174 5' end of the coding region so that we could generate *CESA6* with an N-terminal YFP  
175 fusion. We used this wildtype YFP-*CESA6* construct as a template and performed site-  
176 directed mutagenesis to create ten additional clones of YFP-*CESA6*, each carrying one  
177 of the mutations that were found in our EMS mutants. We transformed each wildtype  
178 and mutated YFP-*CESA6* construct into a loss-of-function *cesa6* allele, *prc1-1* (Fagard  
179 et al., 2000). We selected independent transformants that contain single insertion for  
180 each construct based on the segregation ratio of selection maker in T2 plants. After  
181 analyzing the homozygous transformants with single *CESA6* construct insertion, we  
182 found that the wildtype *CESA6* construct could rescue the growth phenotypes of *prc1-1*  
183 in roots and hypocotyls and the mutated *CESA6* constructs could fully or partially  
184 rescue the growth phenotype of *prc1-1*, depending on the mutation (Figure 3D, 3E;  
185 Supplemental Figure, Figure S3). The transgenic lines carrying any of the ten mutated  
186 *CESA6* constructs exhibited reduced sensitivity to ES20 for both root and hypocotyl  
187 growth, but not the wildtype *CESA6* construct (Figure 3D, 3E, Supplemental Figure,

188 Figure S3). These genetic complementation experiments further confirmed that the  
189 missense mutations in *CESA6* are sufficient to cause reduced sensitivity to ES20.  
190  
191 After we cloned the mutant genes, we found all these amino acids that were mutated in  
192 *es20r* mutants are conserved in *Arabidopsis* CESAs and six are conserved when  
193 compared to RsBcsA (Supplemental Figure, Figure S4). In addition, we found that the  
194 loss-of-function *cesa6* allele, *prc1-1*, was more sensitive to ES20 treatment when  
195 compared with the wildtype (Figure 3F, 3G, Supplemental Figure, Figure S5). Increased  
196 sensitivity of *prc1-1* to ES20 indicates that ES20 might target CESA2 and CESA5 that  
197 function redundantly with CESA6 (Desprez et al., 2007), or even other CESAs as well.  
198 We hypothesized that missense mutations at conserved amino acids in other CESAs in  
199 *Arabidopsis* might lead to reduced sensitivity to ES20 as well. Previously, *fra5* was  
200 reported to carry a missense mutation at P557 of *Arabidopsis* CESA7 (CESA7<sup>P557T</sup>)  
201 (Zhong et al., 2003), which is homologous to the conserved P595 in CESA6  
202 (Supplemental Figure, Figure S4). Another mutant, *any1*, was reported to carry a  
203 missense mutation at D604 of *Arabidopsis* CESA1 (CESA1<sup>D604N</sup>) (Fujita et al., 2013),  
204 which is homologous to the conserved D605 in CESA6. We obtained *fra5* (CESA7<sup>P557T</sup>)  
205 and *any1* (CESA1<sup>D604N</sup>) and tested their response to ES20 in growth assays. As  
206 reported previously, both *fra5* (CESA7<sup>P557T</sup>) and *any1* (CESA1<sup>D604N</sup>) have shorter roots  
207 when compared with wildtype (Figure 3F), suggesting that they play a role in normal  
208 seedling growth, although CESA7 is thought to be mainly involved in secondary cell wall  
209 synthesis. We found that both *fra5* (CESA7<sup>P557T</sup>) and *any1* (CESA1<sup>D604N</sup>) showed  
210 inhibited growth upon ES20 treatment. However, when a lower concentration of ES20

211 (0.5  $\mu$ M) was tested, the root growth of *fra5* (CESA7<sup>P557T</sup>) and *any1* (CESA1<sup>D604N</sup>) was  
212 inhibited by ES20 at a reduced level when compared with wildtype plants (Figure 3F,  
213 3G; Supplemental Figure, Figure S5). Reduced sensitivity to ES20 in *CESA7* and  
214 *CESA1* mutants with alteration of amino acids homologous to our mutants in *CESA6*  
215 indicates that reduced sensitivity to ES20 is not unique to *CESA6*, but also occurs with  
216 other CESAs.

217

### 218 **ES20 targets the catalytic site of CESAs**

219 To better understand how multiple mutations at conserved amino acids in CESAs affect  
220 plant sensitivity to ES20, we used a threading method to model the structure of  
221 Arabidopsis *CESA6* central cytoplasmic domain using the solved crystal structure of  
222 RsBcsA as a guide (Morgan et al., 2013; Morgan et al., 2016). The reason to use  
223 RsBcsA structure as a guide is because it is the only cellulose synthase protein  
224 structure that has been solved so far, and the bacterial cellulose synthase shares many  
225 key amino acids with plant CESAs and the conservation has allowed cloning of the first  
226 plant *CESA* gene (Pear et al., 1996). Threading method has been used previously to  
227 predict plant *CESA* structure using bacterial sequences as a guide (Sethaphong et al.,  
228 2013; Nixon et al., 2016). The modeled structure of *CESA6* catalytic domain contains  
229 multiple  $\alpha$ -helices folded into a globular structure with a central cavity (Figure 4A). The  
230 quality of the model was evaluated with the PROCHECK program (Laskowski et al.,  
231 1993; Laskowski et al., 1996). In the Ramachandran plot, 67.2% of the residues were in  
232 the most favored regions and 23.4% of the residues were in the additional allowed  
233 regions. Ligand binding site prediction enabled by the COACH program identified UDP-

234 glucose phosphonate as a possible ligand for the modeled structure of CESA6 (Yang et  
235 al., 2013a). We further used a molecular docking approach to predict the possible  
236 binding sites for ES20 on the modeled CESA6 central cytoplasmic domain structure.  
237 We found that ES20 and UDP-glucose phosphonate were docked to the same pocket in  
238 the central region of the modeled CESA6 cytoplasmic domain (Figure 4A, 4B): UDP-  
239 glucose phosphonate was docked to a predicted catalytic site that contains 25 amino  
240 acids within a distance of 4 Å (S360, T361, V362, D363, P364, K366, D396, L401,  
241 K537, K538, D562, C563, D564, H565, Q596, F598, V631, G632, T633, D785, S812,  
242 R820, Q823, R826, W827) and ES20 was docked to the same pocket that contains 18  
243 amino acids within a distance of 5 Å (S360, T361, V362, P364, K537, K538, D562,  
244 D564, Q596, F598, G632, T633, D785, S812, R820, Q823, R826, W827). When we  
245 examined the position of mutated amino acids identified in our reduced sensitivity  
246 mutants, we found that most of these amino acids were either directly located at or very  
247 close to the predicted binding site for ES20 and UDP-glucose (Figure 4A, 4B). After  
248 further analysis of the docking results, we found that three amino acids, S360, D562  
249 and Q823 were close to ES20 and hydrogen bonds could form between ES20 and  
250 these amino acids (Figure 4C). We also found that some of the mutated amino acids  
251 that led to reduced sensitivity to ES20 in *es20r* plants, such as D396 and T783, were  
252 conserved and the homologous amino acids were located at the catalytic core in  
253 RsBcsA and participated in the catalytic process (Morgan et al., 2016) (Supplemental  
254 Figure, Figure S4). The structural modeling and molecular docking data in combination  
255 with the chemical genetics results indicate that ES20 could target the catalytic site of  
256 CESAs to inhibit plant cellulose synthesis and cell growth.

257  
258 To further validate our structural model and molecular docking data, we hypothesized  
259 that if we mutated other amino acids in the predicted binding site, the plants should  
260 have reduced sensitivity to ES20. We selected six amino acids that were located at the  
261 predicted ES20 and UDP-glucose binding site on CESA6 (Figure 4A, 4B, amino acids  
262 colored blue), including D562 and Q823 that are predicted to be important for ES20  
263 interaction with CESA6, and created six YFP-CESA6 genomic constructs that each  
264 carried a missense mutation in one of these six amino acids. We also selected L365  
265 and D395 that are not within 4 Å of the predicted UDP-glucose binding site nor within 5  
266 Å of predicted ES20 binding site and created YFP-CESA6 genomic constructs that each  
267 carried a missense mutation in one of the two amino acids. We then transformed these  
268 constructs into the *prc1-1/cesa6* loss-of-function mutant and obtained single insertion  
269 transgenic lines expressing each of the mutated CESA6 containing a predicted  
270 missense mutation. In the absence of ES20, transgenic plants expressing a wildtype  
271 CESA6 construct had normal root and hypocotyl growth when compared to wildtype  
272 controls, whereas the transgenic plants expressing the mutated CESA6 had different  
273 severity of growth defects, depending on the mutation (Figure 4D, 4E; Supplemental  
274 Figure, Figure S6; Supplemental Figure, Figure S7). We analyzed YFP-CESA6 protein  
275 level in transgenic lines expressing wildtype or mutated YFP-CESA6 and found that the  
276 severity of growth defects is not correlated with the protein level (Supplemental Figure,  
277 Figure S8). In the presence of ES20, transgenic plants expressing wildtype CESA6  
278 constructs had similar sensitivity to ES20 for root and hypocotyl growth compared to  
279 wildtype plants (Figure 4D, 4E; Supplemental Figure, Figure S6; Supplemental Figure,

280 Figure S7). The transgenic plants expressing 6 mutated CESA6 constructs in amino  
281 acids (D562N, D564N, D785N, Q823E, R826A, W827A) within 4 Å of the predicted  
282 UDP-glucose binding site and within 5 Å of predicted ES20 binding site showed reduced  
283 sensitivity to ES20 for both root and hypocotyl growth (Figure 4D, 4E; Supplemental  
284 Figure, Figure S6; Supplemental Figure, Figure S7), suggesting that these 6 amino  
285 acids are important for the inhibitory effect of ES20. The transgenic plants expressing  
286 YFP-CESA6 carrying mutations at the two amino acids (L365F and D395N) that are not  
287 within 4 Å of predicted UDP-glucose binding site and 5 Å of predicted ES20 binding site  
288 have the same sensitivity to ES20 inhibition as wildtype YFP-CESA6, indicating these  
289 two amino acids are not essential for the inhibitory effect of ES20 (Figure 4D, 4E;  
290 Supplemental Figure, Figure S6; Supplemental Figure, Figure S7). The CESA6 protein  
291 level in different transgenic lines is not affected by ES20 treatment (Supplemental  
292 Figure S8). Together with the 12 mutant alleles that were identified through EMS mutant  
293 screening, a total of 18 alleles have been obtained that have mutations around the  
294 predicted binding site and exhibited reduced sensitivity to ES20. Transgenic lines  
295 expressing CESA6<sup>L365F</sup> showed similar growth rates and similar sensitivity to ES20 in  
296 roots and hypocotyls when compared to wildtype plants (Figure 4D, 4E; Supplemental  
297 Figure, Figure S6; Supplemental Figure, Figure S7), suggesting this amino acid is not  
298 critical for plant growth or the inhibitory activity of ES20. The construct CESA6<sup>D395N</sup>  
299 could partially rescue the growth of *prc1-1* and the transgenic plants had normal  
300 sensitivity to ES20 (Figure 4D, 4E; Supplemental Figure, Figure S6; Supplemental  
301 Figure, Figure S7), suggesting CESA6<sup>D395N</sup> is required for cell growth but not for the  
302 inhibitory activity of ES20. Reduced sensitivity to ES20 for plant growth caused by six

303 mutations predicted based on the modeled structure and molecular docking provides  
304 additional evidence that ES20 targets the putative catalytic site of CESA6.

305

306 We next used biochemical assays to further test whether ES20 targets CESA6 directly.

307 We first tried a Drug Affinity Responsive Target Stability (DARTS) assay, which detects

308 small molecule and protein interaction by testing whether the small molecule protects

309 the protein from degradation by proteases (Lomenick et al., 2009; Zhang et al., 2016a).

310 Because a mixture of different types of proteases is often used against a protein or a

311 mixture of different proteins in DARTS assay, it is a more qualitative assay than being

312 quantitative for binding kinetics. Instead, examples from multiple protein and small

313 molecule interactions have shown that often one or two concentrations of pronase, a

314 mixture of different types of proteases, show significant protection of the target protein

315 (Chin et al., 2014; Qu et al., 2016; Zhang et al., 2016a; Li et al., 2017; Kania et al.,

316 2018; Mishev et al., 2018; Dejonghe et al., 2019; Rodriguez-Furlan et al., 2019; Zou et

317 al., 2019). The concentrations of the ligand molecule used in DARTS assay are typically

318 higher than the biological inhibitory concentrations (Chin et al., 2014; Qu et al., 2016;

319 Zhang et al., 2016a; Li et al., 2017; Kania et al., 2018; Mishev et al., 2018; Dejonghe et

320 al., 2019; Rodriguez-Furlan et al., 2019; Zou et al., 2019). We isolated total proteins

321 from seedlings of YFP-CESA6 transgenic line and then incubated the proteins with

322 either ES20 or DMSO control. After incubation with the small molecules, the protein was

323 digested with pronase. We used anti-GFP antibody to detect the abundance of YFP-

324 CESA6 after pronase digestion. We found that ES20 significantly protected YFP-CESA6

325 from degradation by pronase (Figure 5A, 5B). The control molecule, Ampicillin, did not



326 protect YFP-CESA6 from degradation by pronase (Figure 5C, 5D). ES20 protection of  
327 YFP-CESA6 from degradation by proteases suggests that ES20 and YFP-CESA6  
328 physically interact. To test whether the mutations in *es20rs* affect the interaction  
329 between CESA6 and ES20, we performed DARTS assay using total protein isolated  
330 from seedlings of YFP-CESA6<sup>P595S</sup> transgenic line and ES20. We chose YFP-  
331 CESA6<sup>P595S</sup> for the test because *esr20-10* (CESA6<sup>P595S</sup>) shows strong resistance to  
332 ES20 treatment in growth (Figure 3A-3C). We found that ES20 did not protect YFP-  
333 CEAS<sup>P595S</sup> from degradation by pronase (Figure 5E, 5F), indicating P595 is important  
334 for the interaction between ES20 and CESA6.

335

336 We next purified the central cytoplasmic domain of CESA6 (amino acids 322–868) with  
337 a GFP tag (GFP-CESA6c) (Figure 5G) and used a Microscale Thermophoresis (MST)  
338 assay (Wienken et al., 2010; Jerabek-Willemsen et al., 2011) to detect the interaction  
339 between ES20 and GFP-CESA6c. MST detects the movement of biomolecules as a  
340 function of ligand in the presence of a temperature gradient. The thermophoresis of a  
341 protein-ligand complex often differs from a protein alone due to binding-induced  
342 changes in size, charge and solvation energy (Wienken et al., 2010; Jerabek-Willemsen  
343 et al., 2011). We detected direct interaction between ES20 and GFP-CESA6c from the  
344 thermophoresis binding curve (Figure 5H). We also performed MST assay to detect  
345 possible interaction between GFP-CESA6c and UDP-glucose. The thermophoresis  
346 binding curve indicates direct interaction between GFP-CESA6c and UDP-glucose  
347 (Figure 5I). Similar amplitude in MST assays have been reported in studies of protein-  
348 protein interaction or protein-ligand interactions (Chen et al., 2017; Liu et al., 2017;



349 Kosmacz et al., 2018; Yan et al., 2018; Zhai et al., 2018; Gerrits et al., 2019; Stepek et  
350 al., 2019; Warren et al., 2019). However, we did not detect interaction between ES20  
351 and GFP or between negative control molecule Ampicillin and GFP-CESA6c  
352 (Supplemental Figure, Figure S9). We next purified the central cytoplasmic domain of  
353 CESA6 carrying P559S mutation (CESA6<sup>P595S</sup><sub>c</sub>) from *E.coli* (Figure 5J) and performed  
354 MST assay to test the interaction of CESA6<sup>P595S</sup><sub>c</sub> with ES20 and UDP-glucose. From  
355 the thermophoresis binding curve, CESA6<sup>P595S</sup><sub>c</sub> can interact with both ES20 and UDP-  
356 glucose (Figure 5K, 5L). The results of DARTS and MST assays confirm that ES20  
357 directly interacts with CESA6. The mutation P595S abolishes the interaction between  
358 CESA6 and ES20 in DARTS assay but recombinant CESA6<sup>P595S</sup><sub>c</sub> can still interact with  
359 ES20. The results from DARTS and MST assays are probably not directly comparable  
360 because DARTS assay uses endogenous CESA6 protein that is part of the protein  
361 complex in the lipid-bilayer environment while the recombinant CESA6 cytoplasmic  
362 domain does not contain the transmembrane domain. It won't be surprising that the  
363 cytoplasmic domain cannot fold into exact the same conformation as the endogenous  
364 full-length CESA6 in the cell.

365  
366 To experimentally test whether ES20 compete with UDP-glucose for the catalytic site,  
367 we examined whether externally supplement of UDP-glucose could partially  
368 compensate the inhibitory effects of ES20. Previous studies indicate that efficient  
369 penetration of externally supplemented UDP-glucose through cell membrane often  
370 requires cell wounding (Brett, 1978; Susette and Gordon, 1983). However, more recent  
371 reports also show that externally supplemented UDP-Glucose could rescue male fertility

372 defects of UDP-Glucose deficiency mutants and reverse the inhibitory effect of an  
373 UGPase/USPase inhibitor in pollen (Park et al., 2010; Decker et al., 2017). We co-  
374 treated wildtype seedlings with ES20 (0.8  $\mu$ M) and UDP-glucose (1 mM) and used  
375 DMSO (0.1%, v/v), UDP-glucose (1 mM) and ES20 (0.8  $\mu$ M) alone as control  
376 treatments. After overnight incubation, we found that externally supplemented UDP-  
377 Glucose could not completely reverse the effects of ES20, because the seedlings co-  
378 treated with 1 mM UDP-Glucose and 0.8  $\mu$ M ES20 still had significant swollen roots  
379 (Figure 5M and 5N). However, we consistently detected statistically differences in root  
380 width between seedlings treated with 0.8  $\mu$ M ES20 alone and seedlings co-treated with  
381 1 mM UDP-Glucose and 0.8  $\mu$ M ES20 (Figure 5M and 5N). The roots in ES20 and  
382 UDP-glucose co-treated samples had less swollen phenotypes when compared with  
383 roots treated with ES20 alone (Figure 5M and 5N). UDP-glucose alone treatment did  
384 not affect root width. Statistically significant compensation of ES20 inhibitory effect by  
385 UDP-glucose is consistent with our modeling results that ES20 targets CESA6 at the  
386 catalytic site.

387

388 **Inhibition of CESA catalytic activity by ES20 treatment affects CSC cellular**  
389 **localization reduces CSCs delivery to the PM**

390 We next used ES20 as an inhibitor of plant CESA catalytic activity and investigated  
391 whether altered catalytic activity affected CSC dynamic behavior. Functional  
392 fluorescence-tagged CESAs have been found to localize mainly at the Golgi, PM, and  
393 small CESA compartments (SmaCCs) (Paredes et al., 2006; Crowell et al., 2009;  
394 Gutierrez et al., 2009; Zhang et al., 2019). At the PM, CSCs translocate along cortical

395 microtubules with a velocity that is dependent upon catalytic activity (Paredes et al.,  
396 2006; Gutierrez et al., 2009; Fujita et al., 2013; Morgan et al., 2013). To confirm that  
397 ES20 inhibits the synthesis of  $\beta$ -1,4-glucan, we treated *Arabidopsis* seedlings  
398 expressing YFP-CESA6 in the *prc1-1* background with 6  $\mu$ M ES20 or 0.1% DMSO for  
399 30 min and imaged the PM of root epidermal cells with spinning disk confocal  
400 microscopy (SDCM), as described previously (Zhang et al., 2019) (Figure 6A-6C). Time  
401 projections from 5-min time-lapse series showed linear tracks in mock-treated cells,  
402 whereas ES20-treated cells had fewer tracks (Figure 6A). By analyzing kymographs  
403 from multiple cells and roots, we found that ES20 treatment significantly reduced the  
404 rate of CSC motility to  $74 \pm 36$  nm/min compared to  $137 \pm 65$  nm/min for mock-treated  
405 cells (Figure 6B, 6C). Reduced CSC velocity after ES20 treatment is consistent with our  
406 molecular docking results that ES20 inhibits cellulose polymerization.

407  
408 CESA subunits are thought to be assembled into CSC rosettes at either the ER or at the  
409 Golgi, based on observation of rosettes in Golgi membranes of freeze-fractured cells  
410 examined by electron microscopy (Haigler and Brown, 1986; Gardiner et al., 2003).  
411 Golgi-localized CSCs are mainly delivered to the PM via putative secretory vesicles  
412 which may be the same as SmaCCs (Gutierrez et al., 2009; Zhang et al., 2019). To  
413 quantify trafficking and dynamics of CSCs within and between compartments, we  
414 performed both static and time-lapse analyses of YFP-CESA6 localization by collecting  
415 3- and 4-D stacks of images from epidermal cells in the root elongation zone with  
416 SDCM. We found that after 30 min of 6  $\mu$ M ES20 treatment, the density of PM-localized  
417 CSCs was reduced by about 25%, from  $1.1 \pm 0.1$  particles/ $\mu\text{m}^2$  to  $0.7 \pm 0.1$

418 particles/ $\mu\text{m}^2$  (Figure 6D, 6E). In normal growing cells, some CSCs are found to localize  
419 to motile SmaCCs in the cortical cytoplasm, and their abundance rapidly increases  
420 when secretion is inhibited (Crowell et al., 2009; Gutierrez et al., 2009; Zhang et al.,  
421 2019). The exact identity and function of these SmaCCs is not well understood, but they  
422 have been found to have partial overlap with TGN proteins and are major vesicle  
423 compartments associated with CSC delivery to the PM (Gutierrez et al., 2009; Zhang et  
424 al., 2019). We found that the abundance of cortical SmaCCs was significantly increased  
425 after 30 min of 6  $\mu\text{M}$  ES20 treatment, from  $4.2 \pm 0.4$  particles/100  $\mu\text{m}^2$  to  $6.8 \pm 0.4$   
426 particles/100  $\mu\text{m}^2$  (Figure 6F, 6G).

427

428 Live-cell imaging of functional fluorescence-tagged CESAs reveals abundant CSCs at  
429 the Golgi (Crowell et al., 2009; Gutierrez et al., 2009; Zhang et al., 2019). Further,  
430 immunogold labeling with an anti-GFP antibody in GFP-CESA3 plants shows CESAs  
431 are localized at the periphery of Golgi cisternae and the TGN (Crowell et al., 2009). We  
432 found that after 1 h of 6  $\mu\text{M}$  ES20 treatment, the fluorescence intensity of YFP-CESA6  
433 at Golgi was increased by more than 20% compared to the DMSO control, from  $2890 \pm$   
434  $147$  to  $3642 \pm 169$  (Figure 6H, 6I). In contrast, the fluorescence intensity of another  
435 Golgi-localized protein, ManI-CFP that is expressed in the same cells, was not affected  
436 by ES20 treatment (Figure 6H, 6I). When we extended the 6  $\mu\text{M}$  ES20 treatment to 2 h,  
437 PM-localized CSCs were completely depleted from the PM and we found increased  
438 abundance of CESA compartments that were associated with microtubules in the  
439 cortical cytoplasm (Figure 6J-6L, Supplemental Movie 1). These data demonstrate that  
440 ES20 treatment affects proper subcellular localization of CSCs.

441  
442 Reduced CSC density at the PM and increased CESA6 abundance in a population of  
443 cortical SmaCCs following ES20 treatment suggest that ES20 affects CSC delivery to  
444 the PM. We examined the effect of ES20 on CSC delivery to the PM using a  
445 Fluorescence Recovery After Photobleaching (FRAP) assay (Gutierrez et al., 2009;  
446 Zhang et al., 2019). We mounted YFP-CESA6 seedlings grown in normal growth media  
447 directly into media supplemented with 0.1% DMSO or 6  $\mu$ M ES20 and then  
448 photobleached a small region of interest on the PM. The delivery of new CSCs to the  
449 bleached region was examined using time-lapse SDCM imaging. After a 5-min acute  
450 treatment with ES20, the delivery rate of CSCs was reduced by about 30%, from  $3.0 \pm$   
451  $0.2$  particles/ $\mu\text{m}^2/\text{h}$  to  $2.0 \pm 0.2$  particles/ $\mu\text{m}^2/\text{h}$  (Figure 7A-7C). Results from the FRAP  
452 assay indicate that ES20 reduces the efficiency of CSC delivery to the PM. Increased  
453 intensity at the Golgi could result from increased CSC delivery from ER to the Golgi,  
454 reduced CSC exit from the Golgi, or both. To test this, we analyzed the dynamics of  
455 YFP-CESA6/CSC transport from ER to the Golgi using FRAP analysis. We treated  
456 YFP-CESA6 seedlings with 0.1% DMSO or 6  $\mu$ M ES20 for 1 h in the presence of a low  
457 concentration of Latrunculin B (2  $\mu$ M) to immobilize Golgi, followed by photobleaching of  
458 individual Golgi stacks and time-lapse imaging to examine fluorescence recovery. We  
459 found that about 30% of the photobleached YFP-CESA6 fluorescence intensity could be  
460 recovered from both DMSO- and ES20-treated seedlings within 5 min, but the rate of  
461 fluorescence recovery was not significantly different between the two treatments (Figure  
462 7D, 7E). Increased YFP-CESA6 fluorescence intensity at the Golgi and normal delivery

463 rate from ER to the Golgi indicate that ES20 likely affects CSC transport out of Golgi but  
464 not for transport from ER to the Golgi.

465

466 **Mutations in amino acids at the CESA6 catalytic site reduces CSC delivery to the**  
467 **PM**

468 To further evaluate whether altering the catalytic site affects the trafficking of CSCs, we  
469 studied the trafficking dynamics of YFP-CESA6 with mutations at the predicted catalytic  
470 site in etiolated hypocotyl epidermal cells. We selected three transgenic lines that  
471 express YFP-CESA6 constructs carrying mutations at conserved amino acids in the  
472 catalytic core of bacterial CesaA in *cesa6/prc1-1*. We used transgenic plants expressing  
473 wildtype YFP-CESA6 construct in *cesa6/prc1-1* as a control. Among the mutated  
474 CESA6 constructs we selected, CESA6<sup>T783I</sup> and CESA6<sup>D785N</sup> contain mutations at the  
475 conserved TED motif at the predicted catalytic site that has been shown to be essential  
476 for cellulose catalytic synthesis in bacteria (Morgan et al., 2016) (Figure 4B,  
477 Supplemental Figure, Figure S4). We also chose CESA6<sup>Q823E</sup> because it is predicted to  
478 be in the catalytic site and form a hydrogen bond with ES20 (Figure 4B, 4C). Because  
479 these mutations are predicted to affect the catalytic activity of CSCs, it is expected that  
480 the CSCs have reduced motility at the PM. By quantifying time-lapse images of CSC  
481 translocation in the PM, we found that all three mutations cause reduced motility of  
482 CSCs at the PM compared wildtype CESA6 (Figure 8A-8C). Slower motility suggests  
483 that these mutations affect efficient cellulose catalytic synthesis on the PM. We next  
484 used FRAP analysis to test whether the mutations affect the delivery of CSCs to the  
485 PM. We found that all three mutations significantly reduced the delivery rate of CSCs to

486 the PM (Figure 8D, 8E). Both reduced motility and delivery rate observed with  
487 CESA6<sup>T783I</sup>, CESA6<sup>D785N</sup>, and CESA6<sup>Q823E</sup> mutations indicate that the catalytic site of  
488 CSCs affects their subcellular trafficking.

489

490 Because these CESA6 mutants were resistant to ES20 as assayed by seedling growth,  
491 we investigated whether the mutations cause reduced sensitivity to ES20 treatment at  
492 the cellular level as well. We first analyzed the effect of short-term ES20 treatment on  
493 the motility CSCs in the PM carrying mutations at the catalytic site of CESA6. We  
494 treated light-grown seedlings of YFP-CESA6, YFP-CESA6<sup>T783I</sup>, YFP-CESA6<sup>T785N</sup> and  
495 YFP-CESA6<sup>Q823E</sup> with 6  $\mu$ M ES20 for 30 min and quantified the effect of ES20 on CSC  
496 motility at the PM, CSC density at the PM, and the abundance of cortical SmaCCs in  
497 root epidermal cells. We found that the velocity of CSCs containing mutated CESA6  
498 was not further reduced by ES20 treatment for all three mutated YFP-CESA6 lines  
499 (Figure 9A-9C). When we investigated CSC density at the PM after ES20 treatment, we  
500 found that only in the YFP-CESA6<sup>T783I</sup> line was CSC density at the PM reduced by  
501 ES20 treatment. Statistical analysis also shows that although CSC density at the PM in  
502 YFP-CESA6<sup>T783I</sup> was reduced by ES20 treatment, the abundance was still higher than  
503 that of YFP-CESA6 treated with ES20 (Figure 9D, 9E). In YFP-CESA6<sup>T785N</sup> and YFP-  
504 CESA6<sup>Q823E</sup> lines, CSC density at the PM was not affected by ES20 treatment. We next  
505 investigated cortical SmaCC density in three mutated YFP-CESA6 lines after ES20  
506 treatment. We found that in YFP-CESA6<sup>T783I</sup>, SmaCC density was increased at a level  
507 similar to that of YFP-CESA6 after ES20 treatment (Figure 9F, 9G). SmaCC density  
508 was not affected by ES20 treatment in YFP-CESA6<sup>T785N</sup> and YFP-CESA6<sup>Q823E</sup> lines.

509 Reduced sensitivity to ES20 treatment for CSC motility and density in the PM, as well  
510 as cortical SmaCC density in mutated YFP-CESA6 lines indicate that the amino acids at  
511 the catalytic site are important for the inhibitory effects of ES20 at the cellular level. Our  
512 analysis of three mutated YFP-CESA6 lines also indicates that the amino acids at the  
513 catalytic site contribute differently to the response to ES20 treatment at the cellular  
514 level. CSC behavior is more sensitive to ES20 treatment in YFP-CESA6<sup>T783I</sup> than YFP-  
515 CESA6<sup>T785N</sup> and YFP-CESA6<sup>Q823E</sup>.

516

## 517 **DISCUSSION**

518 Due to the importance of cellulose in agriculture and industry, understanding the  
519 mechanisms of cellulose biosynthesis has been one of the most important topics in  
520 biology. Chemical inhibitors that allow transient manipulation of target protein behaviors  
521 serve as valuable tools in biological research. Here we identified a novel cellulose  
522 synthase inhibitor that targets the catalytic site of Arabidopsis CESA6. ES20 is likely to  
523 have different target site than isoxaben and C17 because the mutations that lead to  
524 reduced sensitivity to these inhibitors are very different (Scheible et al., 2001; Desprez  
525 et al., 2002; Hu et al., 2016; Hu et al., 2019). Indaziflam is another potent cellulose  
526 synthesis inhibitor but it is not known how it affects CESA activity (Brabham et al.,  
527 2014). From our mutant screen, we only identified mutants of *CESA6* but not other  
528 *CESAs* that are resistant to ES20. However, we found that comparable mutants in  
529 *CESA1* (*any1*, *CESA1*<sup>D604N</sup>) and *CESA7* (*fra5*, *CESA7*<sup>P557T</sup>) also have reduced  
530 sensitivity to ES20 inhibition, although a lower dosage of ES20 is required to observe a  
531 significant resistant phenotype in *any1* and *fra5*. Reduced sensitivity of *any1* and *fra5* to



532 ES20 indicates that ES20 might target CESA1 and CEAS7, and probably other CESAs  
533 as well. We noticed that the mutations in other CESAs might have stronger growth  
534 phenotypes than that of CESA6 mutants, for example, *any1* has a stronger root growth  
535 phenotype than *es20r4* (CESA6<sup>D605N</sup>) (Figure 3). It is possible that ES20 can target  
536 multiple CESAs but we could not identify mutants in other CESAs because the dosage  
537 of ES20 (5 μM) we used for the screening was too high to allow us to identify those  
538 mutants. CESA7 has been shown to function mainly in secondary cell wall synthesis  
539 (Gardiner et al., 2003; Taylor et al., 2003; Brown et al., 2005). However, we found that  
540 *fra5* has a slightly reduced root growth at the young seedling stage and demonstrated a  
541 slightly reduced sensitivity to ES20. It seems that *CESA7* has a function in young  
542 seedling root development as well. We also cannot rule out the possibility that CESA6  
543 holds a special position in the CSC rosette that allows ES20 to target only CESA6 to  
544 affect the entire protein complex during cellulose synthesis. We expect further  
545 characterization of ES20 specificity for different CESAs in Arabidopsis and other plants  
546 will be required for better use of ES20 as a CESA inhibitor. ES20 does not affect the  
547 localization of PIN2 nor BRI1, indicating it does not disrupt general exocytosis in plants.  
548 We did not find evidence for other potential targets for ES20. In our mutant screen, we  
549 did not find mutations in any other genes that have caused reduced sensitivity to ES20.  
550 Based on our current results, we expect ES20 can be used as a CESA6 inhibitor in  
551 Arabidopsis to understand the molecular mechanisms of cellulose catalytic synthesis  
552 and the integration between cellulose catalytic synthesis and CSC dynamic behaviors.  
553

554 Due to the importance of cellulose in plant growth, null mutants of CESAs often have  
555 severe growth phenotypes that have limited their contributions in understanding the  
556 molecular mechanisms of CESA function. Missense mutations at critical domains can  
557 provide valuable information on the mechanisms of domain function. We obtained a  
558 group of new *cesa6* missense mutation alleles that are located at the predicted CESA6  
559 catalytic site. These mutants have different severity in plant growth defects and have  
560 reduced sensitivity to ES20. The mutant growth defects and the reduced motility of  
561 mutated proteins on the PM support the modeled structure of CESA6 catalytic site. Site-  
562 directed mutagenesis of amino acids at the predicted catalytic site and the phenotype  
563 analyses on these newly designed mutants provide further support for our modeling  
564 results. Based on the structure modeling and molecular docking results, there are 25  
565 amino acids located within 4 Å to UDP-glucose phosphonate and 18 amino acids  
566 located within 5 Å to ES20. Interestingly, the list of 18 amino acids that are predicted to  
567 be within 5 Å to ES20 completely overlap with the 25 amino acids that are predicted to  
568 be within 4 Å to UDP-glucose phosphonate. Among 25 amino acids that are located  
569 within 4 Å to UDP-glucose phosphonate, only L401 is located in the PCR domain  
570 (aa399-523) and none is located in the CSR domain (aa643-771), indicating the  
571 majority of the amino acids in PCR and CSR domains might not be directly involved in  
572 the catalytic process. Although further high-resolution experimental data, such as x-ray  
573 diffraction or cryo-EM, is required to resolve the structure of CSC catalytic site, our  
574 modeling results with the support of chemical genetic analysis provide important  
575 reference for understanding the catalytic site composition of plant CESAs. Future site-

576 directed mutagenesis on other amino acids at the predicted catalytic site will allow  
577 further validation of our modeled catalytic site composition.  
578  
579 Years of studies have found that microtubules, actomyosin, vesicle trafficking  
580 machineries, and CESA-interacting proteins play important roles in regulating precise  
581 control of CSC trafficking and cellulose biosynthesis. Here we show, by quantitative live  
582 cell imaging of wildtype YFP-CESA6 treated with ES20 as well as mutated YFP-CESA6  
583 at amino acids in the catalytic site, that the catalytic site of CSCs contains information  
584 that is important not only for cellulose synthesis but also for CSC delivery to the PM.  
585 Three mutations at the catalytic site, YFP-CESA6<sup>T783I</sup>, YFP-CESA6<sup>T785N</sup> and YFP-  
586 CESA6<sup>Q823E</sup>, significantly reduce CSC motility on the PM and CSC delivery to the PM. It  
587 is possible that interactions with ES20 or mutation at the catalytic site alter the structural  
588 conformation of CSCs and this conformation change might lead to reduced efficiency of  
589 the CSCs being recognized by other proteins that are essential for regulating CSC  
590 delivery to the PM.  
591  
592 When we tested the sensitivity of mutated YFP-CESA6 to ES20 treatment at the cellular  
593 level, we found that the velocity of CSCs on the PM is not further reduced by ES20  
594 treatment. When we compared the static localization of wildtype YFP-CESA6 and  
595 mutated YFP-CESA6 treated with ES20, we found that the mutations cause different  
596 sensitivity to ES20 treatment at the cellular level. For example, after 30 min 6  $\mu$ M ES20  
597 treatment, the density of CSCs at the PM was reduced and the density of cortical  
598 SmaCCs was increased significantly in YFP-CESA6<sup>T783I</sup>. However, CSC density at the

599 PM and cortical SmaCCs density was not affected by ES20 treatment in YFP-  
600 CESA6<sup>T785N</sup> and YFP-CESA6<sup>Q823E</sup>. Different sensitivity to ES20 treatment indicates that  
601 the amino acids at the catalytic site may play different roles in regulating CSC  
602 trafficking. We did not observe any abnormal CSC density at the PM and the  
603 abundance of cortical SmaCCs in any of the three mutated YFP-CESA6 constructs from  
604 static images (Figure 9D-9G). However, both ES20 treatment and mutations at the  
605 catalytic site significantly reduced the motility of CSC in the plane of the PM as well as  
606 the rate of CSC delivery to the PM. Our CSC motility analysis is consistent with previous  
607 finding that the catalytic activity affects the motility of CESA1<sup>D604N</sup> (*any1*) at the PM  
608 (Fujita et al., 2013). The difference between ES20 treatment and catalytic site mutation  
609 in CSC PM-localized CSC density and SmaCC density may because that ES20  
610 treatment time was short (30 min) and reflects the acute response of catalytic inhibition  
611 while analysis on mutated YFP-CESA6 reflects the equilibrated delivery and endocytic  
612 recycling that can provide feedback to each other. Thus, short-term inhibitor treatment  
613 allows a more direct observation on the cellular response of catalytic inhibition. We  
614 found that Golgi-localized CSCs were increased after 1 h ES20 treatment (Figure 6H,  
615 6I). Due to the poor understanding on the mechanisms of CSC assembly, modification  
616 and trafficking at the Golgi, it is unclear how ES20 treatment affects CSC localization at  
617 the Golgi. It is possible that the inhibitor treatment affects the efficiency of CSC  
618 assembly or the efficiency of assembled CSC being selected by the receptors for CSC  
619 export from Golgi.  
620

621 There are eight predicted transmembrane domains in each CESA. We identified two  
622 amino acids, L286 and G935, at the transmembrane domains that led to reduced  
623 sensitivity to ES20 in plant growth when they are mutated. We were not able to include  
624 these transmembrane domain amino acids in structure modeling and molecular docking  
625 and do not know how they are involved in cellulose catalytic synthesis or CESA6  
626 interaction with ES20. During cellulose catalytic synthesis, some amino acids at the  
627 transmembrane domain must form the transmembrane pore to facilitate glucose  
628 polymerization and polymer transmembrane translocation. It is possible that amino  
629 acids L286 and G935 are involved in the transmembrane translocation of cellulose  
630 polymers. G929 is located at the small predicted cytoplasmic loop between 4<sup>th</sup> and 5<sup>th</sup>  
631 transmembrane helices and the mutation at this amino acid caused the most obvious  
632 resistance to ES20. The function of this amino acid in cellulose synthesis awaits further  
633 investigation. Previous evidence has shown that the amino acids between the 5<sup>th</sup> and  
634 the 6<sup>th</sup> transmembrane helices are essential for CESA function (Slabaugh et al., 2014).  
635 G935 is located at the 5<sup>th</sup> transmembrane helix and G929 is very close to the 5<sup>th</sup>  
636 transmembrane helix (Figure 3C). It is possible that the amino acids at the loop between  
637 4<sup>th</sup> and 5<sup>th</sup> transmembrane helix and the amino acids at the 5<sup>th</sup> transmembrane helix  
638 participate in cellulose catalysis and CSC relocation upon successful adding of glucose  
639 to existing cellulose chain. It is possible that the loop between the 5<sup>th</sup> and 6<sup>th</sup>  
640 transmembrane helices is oriented toward the cytosol phase to provide essential  
641 structural conformation support during cellulose synthesis (Slabaugh et al., 2014).  
642

643 We found discrepancy between our observation and a recent publication on the function  
644 of CESA6<sup>Q823</sup> and CESA6<sup>D395</sup> (Park et al., 2019). There authors created GFP-  
645 CESA6<sup>Q823E</sup> and GFP-CESA6<sup>D395N</sup> constructs using CESA6 coding sequence driven by  
646 endogenous promoter and tested the function of these constructs in complementing the  
647 growth phenotype of *prc1-1*. They found that GFP-CESA6<sup>Q823E</sup> could completely rescue  
648 the growth phenotype of *prc1-1* but GFP-CESA6<sup>D395N</sup> could not rescue at all. They also  
649 found that GFP-CESA6<sup>Q823E</sup> had a similar motility on the PM compared with wildtype  
650 GFP-CESA6. In our hands, when we used the genomic content of CESA6 containing  
651 endogenous promoter and the genome sequence to create the mutation and used  
652 single insertion transformants for phenotype analysis, both YFP-CESA6<sup>Q823E</sup> and YFP-  
653 CESA6<sup>D395N</sup> could partially rescue the growth phenotype of *prc1-1*. The motility of YFP-  
654 CESA6<sup>Q823E</sup> at the PM was significantly reduced when compared to the wildtype YFP-  
655 CESA6 (Figure 8). Different observations on the function of CESA6<sup>Q823</sup> and CESA6<sup>D395N</sup>  
656 might result from the differences in the constructs used for the complementation  
657 experiments. Nonetheless, the overall conclusion of both studies supports the argument  
658 that CESA catalytic activity correlates with efficient transport of CSCs through the  
659 endomembrane system.

660

## 661 MATERIAL AND METHODS

### 662 *Plant materials and growth conditions*

663 To test the inhibitory effect of ES20 on plant growth, *Arabidopsis* wildtype Col-0 plants  
664 were used. To test the effect of ES20 on cellular localization of proteins in different  
665 organelles, transgenic plants expressing fluorescence-tagged PIN2, HDEL, Got1p,  
666 VHA1-a1, ROP6, PIP2a and PGP4 were used (Cutler et al., 2000; Matsushima et al.,  
667 2003; Xu and Scheres, 2005; Dettmer et al., 2006; Cho et al., 2007; Fu et al., 2009;  
668 Geldner et al., 2009). Seeds for plants that were used for growth assays or live cell  
669 imaging were sequentially sterilized with 50% bleach and 75% ethanol. After washing  
670 with sterilized water, seeds were sowed on ½-strength Murashige and Skoog (MS)  
671 media with 1% sucrose and 0.8% agar at pH 5.8. The plants were grown under  
672 continuous light of 130  $\mu\text{mol m}^{-2} \text{s}^{-1}$  intensity illuminated by Philips F25T8/TL841 25 watt  
673 bulb at 22 °C.

674

### 675 *Plant growth assay*

676 To quantify the inhibitory effect of ES20 on *Arabidopsis* root growth, sterilized wildtype  
677 seeds were sowed on gridded petri plates containing ½-strength MS media  
678 supplemented with different concentrations of ES20. The plates were placed in vertical  
679 orientation in the growth chamber for root measurement. Starting from 3 d after the  
680 plates were placed in the growth chamber, the plates were scanned using Epson  
681 Perfection V550 scanner every day. The root length of plants was measured using  
682 ImageJ. To test the effect of ES20 on etiolated hypocotyl growth, sterilized wildtype  
683 seeds were sowed on ½-strength MS media supplemented with different concentrations  
684 of ES20. The petri dishes were wrapped in two layers of aluminum foil and kept at 22 °C  
685 for 7 d. The petri dishes were scanned and the hypocotyl length was measured using  
686 ImageJ. ES20 was dissolved in DMSO to obtain a stock solution of 12 mM and stored at  
687 -20 °C.

688

689 To analyze the effect of ES20 treatment on epidermal cell growth from light-grown roots,  
690 5-day-old wildtype seedlings were treated with 0.1% DMSO or 6  $\mu\text{M}$  ES20 for 12 h. The

691 seedlings were stained with 1  $\mu$ M fluorescein diacetate (ACROS organics) for 5 min and  
692 the fluorescence in epidermal cells was imaged with a Zeiss 710 laser scanning  
693 confocal microscope equipped with a 20x objective. To analyze the effects of ES20  
694 treatment on hypocotyl cell growth, 5-day-old wildtype seedlings grown in the dark were  
695 stained with 1  $\mu$ M fluorescein diacetate for 5 min and the fluorescence of epidermal  
696 cells from the middle section of the hypocotyl were imaged under the same condition as  
697 for root epidermal cells.

698

#### 699 *EMS mutagenesis and mutant screening*

700 In order to obtain a mutagenized *Arabidopsis* population, SYP61-CFP and PIN2-GFP  
701 seeds were mutagenized following a published protocol (Kim et al., 2006). Mutagenized  
702 seeds were sowed in soil and the plants were grown under continuous light and allowed  
703 to self, yielding M2 seeds. The M2 seeds were collected as pooled populations. About  
704 400,000 seeds from the M2 generation of the SYP61-CFP population and 100,000  
705 seeds from the PIN2-GFP M2 population were sterilized and sowed on media  
706 containing 5  $\mu$ M ES20. Individual plants with elongated roots and green leaves were  
707 transferred to soil to produce the M3 generation. The M3 plants were examined for  
708 sensitivity to ES20. Individual M3 lines with reduced sensitivity to ES20 were crossed to  
709 *Ler* ecotype to generate the mapping population and were also crossed to SYP61-CFP  
710 or PIN2-GFP to clean up the genetic background.

711

#### 712 *High-throughput genome sequencing and sequence analysis*

713 The seeds from F2 populations of mutants crossed with *Ler* were sowed on media  
714 containing 5  $\mu$ M ES20 and the segregation of resistant seedlings was evaluated. The F2  
715 populations of the outcrosses segregated for sensitivity to ES20. For each mutant,  
716 about 100 F2 seedlings with longer roots on 5  $\mu$ M ES20 were pooled for DNA isolation.  
717 The genomic DNA was applied for high-throughput sequencing. The resulting DNA  
718 sequence was aligned to the *Arabidopsis* genome (TAIR10) and the single nucleotide  
719 polymorphism (SNP) was analyzed. Candidate SNPs for ES20 sensitivity were  
720 identified through next-generation EMS mutation mapping tool (Austin et al., 2011).

721



722 *Crystalline cellulose content measurement*

723 *Arabidopsis* wildtype seeds were sowed on media supplemented with 0.1% DMSO or  
724 different concentrations of ES20. After stratification, the plants were grown in the dark  
725 for 7 d or under light for 10 d. 7-day-old dark-grown seedlings or roots from 10-day-old  
726 light-grown seedlings were used for cell wall preparation. Dark-grown seedlings were  
727 washed with ddH<sub>2</sub>O three times to remove seed coats and any residue from the growth  
728 media, then ground into fine powder under liquid nitrogen. The roots from light-grown  
729 seedlings were cut and washed with ddH<sub>2</sub>O to remove any residue from the growth  
730 media, then ground into fine powder under liquid nitrogen. The powder was extracted 2  
731 times with 80% ethanol, once with 100% ethanol, once with 1:1 (v/v) MeOH-CHCl<sub>3</sub>, and  
732 once with acetone. The resulting insoluble cell wall fraction was dried in a fume hood for  
733 2 d before weight measurement. Cellulose content was measured by the Updegraff  
734 method (Updegraff, 1969; Foster et al., 2010). Briefly, cell wall material was hydrolyzed  
735 by trifluoroacetic acid (TFA) and then Updegraff reagent (acetic acid: nitric acid: water,  
736 8:1:2 v/v) to yield crystalline cellulose. Crystalline cellulose was hydrolyzed by 72%  
737 sulfuric acid to glucose. Glucose concentration was measured with a colorimetric  
738 method by developing color in Anthrone reagent (freshly prepared 2 mg/mL anthrone in  
739 concentrated sulfuric acid) and reading OD<sub>625 nm</sub> in a plate reader (Tecan Infinite  
740 200Pro). Nine repeats were performed for each treatment, including 3 repeats for cell  
741 wall preparation and 3 repeats for measurement.

742

743 *CESA6c protein expression and purification*

744 To obtain CESA6 central cytosolic domain protein for MST assay, we inserted GFP  
745 coding sequence into pRSF-Duet-1 vector using *SacI* and *PstI* restriction sites. GFP  
746 coding sequence was amplified from pUBN-GFP-DEST vector. Central cytosolic domain  
747 of CESA6 (CESA6c) was amplified from *Col-0* cDNA into the C-terminal of GFP.  
748 Primers used for cloning were listed in Supplemental Table 1. Verified recombinant  
749 clone was transformed into BL21 (DE3) competent cell for protein expression. The cells  
750 were cultured and grown at 37 °C in LB media till OD<sub>600</sub> reached 0.6. Protein  
751 expression was induced by 0.1 mM isopropyl β-D-1-thiogalactopyranoside (IPTG) at 16  
752 °C for overnight. After overnight induction, the cells were lysed by sonication and the

753 fusion protein was purified using HisTrap HP histidine-tagged protein purification  
754 column of AKTA pure FPLC system (GE Healthcare, Pittsburgh, PA). The purified  
755 protein was further dialyzed overnight and further purified with HiLoad 16/600 Superdex  
756 200 pg column (GE Healthcare, Pittsburgh, PA) using AKTA pure FPLC system.  
757 Purified GFP-CESA6c protein was further identified by SDS/PAGE. CESA6c construct  
758 was used as a template for creating CESA6<sup>P595S</sup>c construct by site-directed  
759 mutagenesis. CESA6<sup>P595S</sup>c protein was purified using the same protocol as CESA6c  
760 except that enriched TB media was used to grow *E.coli* cells.

761

#### 762 *MST assays*

763 MST assays were carried out using a Monolith NT.115 (NanoTemper) machine at the  
764 Chemical Genomics Facility of Purdue University. Increasing concentrations of ES20  
765 were titrated against 100 nM of the GFP-CESA6c protein in a standard MST buffer (50  
766 mM Tris, pH 7.5, 150 mM NaCl, 10 mM MgCl<sub>2</sub>, 0.05% Tween 20). ES20 was dissolved  
767 in DMSO and the final concentration of DMSO was 5% (vol/vol). MST standard  
768 capillaries were used to load the samples to the MST instrument. Triplicate reactions  
769 were performed for each test. The MST data was processed using MO. Affinity Analysis  
770 Version 2.3 software.

771

#### 772 *DARTS assays*

773 To test for the interaction between CESA6 and ES20 using DARTS assay, 7 days old  
774 YFP-CESA6 light grown seedlings were harvested and ground to powder in liquid  
775 nitrogen. The ground tissue was homogenized in the lysis buffer (50 mM Tris-Hcl,  
776 PH7.5, 150 mM NaCl, 0.5% Triton X-100, 2 mM DTT, one tablet/50 mL EDTA free  
777 Pierce protease inhibitor (Thermo Fisher)) at 2:1 ratio (2 mL buffer: 1 g tissue).  
778 Homogenized samples were transferred to a 2 mL microcentrifuge tube and centrifuged  
779 for 30 min (20,000 *g*, 4°C). The supernatant was collected after centrifugation and  
780 saved as total extracted protein. 700 µL extracted total protein was incubated with  
781 DMSO (0.1%) or ES20 (300 µM) at room temperature on an orbital shaker for 1 h. Then  
782 the mixture was divided into 6 small tubes with each contained 100 µL of the mixture  
783 and was incubated with 1 µL of pronase at 1:300 dilutions at room temperature for 30

784 min. The proteolysis reaction was terminated by adding SDS loading buffer and boiled  
785 at 100 °C for 6 min. The boiled samples were loaded to SDS/PAGE for further Western  
786 blot analysis. YFP-CESA6 protein was detected using anti-GFP antibody (Takara,  
787 catalog # 632381) and SEC12 was detected using anti-SEC12 antibody (Bar-Peled and  
788 Raikhel, 1997) as a control. Horseradish peroxidase conjugated secondary antibodies  
789 and Clarity Western ECL substrate (BIO-RAD, Hercules, CA) were further used to  
790 detect the presence of YFP-CESA6 and SEC12. The X-ray films were scanned and the  
791 signal intensity of each protein band was quantified after background subtraction using  
792 Image J. The relative intensities were quantified by dividing ES20 treated samples by  
793 DMSO treated samples for each pronase concentration.

794

#### 795 *Lignin and callose staining*

796 To examine the effect of ES20 on lignin and callose accumulation, *Col-0* seedlings were  
797 grown on 1/2 MS media supplemented with DMSO (0.1%) or ES20 (4 µM) in dark  
798 condition for three days. Lignin staining was performed following published protocol  
799 (Pradhan Mitra and Loque, 2014). Dark-grown seedlings were incubated in  
800 phloroglucinol (Acros Organic) solution (20 mg/mL in ethanol: hydrochloric acid (2:1  
801 vol/vol)) for 5 min and then imaged under white light. Callose staining was performed by  
802 following published protocol (Harris et al., 2012). Dark-grown seedlings were incubated  
803 in aniline blue (Acros Organic) staining solution (0.1 mg/mL in 0.07 M sodium  
804 phosphate buffer, pH 9) in the dark for 20 min. The seedlings were then imaged under  
805 UV light.

806

#### 807 *UDP-glucose complementation on the effect of ES20 in causing root swollen*

808 To test whether supplement of UDP-glucose can complement the effect of ES20  
809 treatment, 3.5 days old *Col-0* seedlings grown on ½ MS agar media under light  
810 condition were used. For each treatment, 16 seedlings were transferred from ½ MS agar  
811 plate to 2 ml ½ MS liquid media supplemented with DMSO (0.1%, v/v), ES20 (0.8 µM),  
812 UDP-glucose (1 mM) or ES20 (0.8 µM) and UDPG (1 mM) in 24 well plate. After 17  
813 hours of treatment, seedlings were mounted between two stripes of double-sided tape  
814 on glass slide and covered with coverslip carefully for image collection under white light

815 using a compound microscope. The width of root elongation zone for each seedling was  
816 quantified by ImageJ.

817

### 818 *Vector construction and generation of transgenic Arabidopsis plants*

819 To construct a YFP-CESA6 binary vector, a 2245bp CESA6 promoter fragment was  
820 amplified with CESA6P-F  
821 TCTGATCCAAGCTCAAGCTAAGCTTTTTCTATTCTATAGTCTTGAAAATT and  
822 CESA6P-R ATTTGTCTGAAAACAGACACAG primers using Col-0 genomic DNA as a  
823 template. The *YFP* tag was amplified from pUBN-YFP-Dest plasmid with primers YFP-F  
824 TGTCTGTTTTTCAGACAAATATGGTGAGCAAGGGCGAGG and YFP-R  
825 CGACCACCGGTGTTTCATCTTGTACAGCTCGTCCATG. *CESA6* with terminator was  
826 amplified from Col-0 genomic DNA with primers CESA6g-F  
827 ATGAACACCGGTGGTTCGGTT and CESA6g-R  
828 GGTACCCGGGGATCCTCTAGAGTGATCCACATCTTAAATATATTA. pH7WGR2  
829 plasmid was digested with *Hind*III and *Xba*I to remove the 35S promoter and the RFP  
830 tag. The modified pH7WGR2 linear vector without 35S promoter and RFP tag was  
831 ligated with *CESA6* promoter, *YFP* and *CESA6* genomic sequence through Gibson  
832 Assembly method using a Gibson Assembly Master Mix kit (New England Biolabs,  
833 Ipswich, MA). The construct was verified by DNA sequencing. All mutated YFP-CESA6  
834 constructs used the verified YFP-CESA6 plasmid as the template and were obtained by  
835 Q5 Site Directed Mutagenesis Kit (New England Biolabs, Ipswich, MA) with primers  
836 listed in Supplement Table1. All of the mutated YFP-CESA6 constructs were verified by  
837 DNA sequencing. Verified constructs were further dipped into *prc1-1* (CS297) which  
838 was obtained from the Arabidopsis Biological Resource Center (ABRC) using  
839 *Agrobacterium tumefaciens* mediated transformation (Clough and Bent, 1998).

840

### 841 *Live-cell imaging of fluorescence-tagged proteins*

842 To test the effect of ES20 on cellular localization of fluorescence-tagged proteins,  
843 transgenic plants expressing different fluorescence-tagged proteins were grown on ½-  
844 strength MS agar plates for 5 d. The seedlings were incubated in ½-strength MS liquid  
845 media supplemented with 6 µM ES20 for 2 h. The images were collected using a Zeiss

846 710 laser scanning confocal microscope equipped with a 40x/1.2 NA water objective.  
847 For imaging GFP-tagged proteins, the 488-nm laser line was used as excitation source  
848 and emission light at 493–598 nm was collected. For imaging YFP-tagged proteins, the  
849 514-nm laser line was used as excitation source and the emission light at 519–621 nm  
850 was collected. To characterize the cellular localization and trafficking dynamics of  
851 different mutated CESA6 lines, 3 days old transgenic plants expressing YFP-CESA6  
852 with different mutations were grown in dark on 1/2 MS (without sucrose). The 7th or the  
853 8th cell below the hook (about 2 mm below the hook) was used for image collection.

854

#### 855 *Structure modeling of CESA6 cytoplasmic domain*

856 The general topology of CESA6 used in Figure 3C was predicted by TMHMM Server v.  
857 2.0 program provided by Department of Bio and Health informatics at Technical  
858 University of Denmark (<http://www.cbs.dtu.dk/services/TMHMM/>). The large cytoplasmic  
859 domain of *Arabidopsis* CESA6 protein sequence (amino acids 322–868) was sent to i-  
860 TASSER server for 3D structure modeling with threading method (Roy et al., 2010;  
861 Yang et al., 2015). The modeled structure was visualized using the PyMol software  
862 (Alexander et al., 2011). The binding site of UDP-glucose on CESA6 large cytoplasmic  
863 domain model was predicted by COACH server and UDP-glucose phosphonate  
864 structure was used for the prediction per program suggestion (Yang et al., 2013b, a).  
865 The small molecule ES20 was docked with CESA6 large cytoplasmic domain model  
866 using Autodock Vina in PyRx software (Trott and Olson, 2010; Dallakyan and Olson,  
867 2015).

868

#### 869 *Spinning-disk confocal microscopy (SDCM)*

870 For SDCM live cell imaging, seedlings were grown vertically for 5 d and images were  
871 taken from the 2nd or 3rd epidermal cell below the first obvious root hair initiation in the

872 root elongation zone. Two thin strips of double-sided adhesive tape were placed on top  
873 of glass slides about 2 cm apart. 100  $\mu$ l of ½-strength MS liquid growth media  
874 containing DMSO or specified concentrations of ES20 was applied to the slide and  
875 seedlings were mounted in the liquid media. A 22 x 40 mm cover glass was placed on  
876 top of the double-sided tape for imaging. For longer term imaging during CESA velocity  
877 analyses, seedlings were mounted on a piece of 1-mm thick 0.6% phytigel pad affixed  
878 to the glass slide to minimize compression and liquid evaporation.

879

880 To examine the cellular localization of YFP-CESA6; ManI-CFP and YFP-  
881 CESA6;mCherry-TUA5, SDCM imaging was performed using a CSU-X1-A1 Yokogawa  
882 scanning unit mounted on an Olympus IX-83 microscope, equipped with a 100X/1.4NA  
883 UPlanSApo oil objective (Olympus) and an Andor iXon Ultra 897BV EMCCD camera  
884 (Andor Technology). YFP, CFP and mCherry fluorescence were excited with 515-nm,  
885 445-nm and 561-nm laser lines and emission collected through 542/27-nm, 479/40-nm  
886 and 607/36-nm filters, respectively.

887

888 For fluorescence recovery after photobleaching (FRAP) experiments, images were  
889 collected using a Zeiss Observer Z.1 microscope, equipped with a Yokogawa CSU-X1  
890 head and a 100X/1.46 NA PlanApo objective (Zeiss). For the PM-localized CESA6  
891 FRAP, photobleaching was performed with a Vector scanner (Intelligent Imaging  
892 Innovations) with a 515-nm laser line at 100% power and 1 ms/scan. Timelapse images  
893 were collected at the PM with a 5-s interval for 121 frames, with photobleaching in a  
894 small region (44.2  $\mu$ m<sup>2</sup>) after the 4th frame, and recovery for total 10 min. For FRAP of



895 CESA6-containing Golgi, a 515-nm laser line was set to 100% power with 3 ms/scan.  
896 Timelapse images were collected at the cortical cytoplasm (about 0.4  $\mu\text{m}$  below the PM)  
897 with 5-s intervals for 121 frames. Photobleaching of a small region (7.1  $\mu\text{m}^2$ ) was  
898 performed after the 4th frame, and recovery measured for 10 min.

#### 899 *SDCM image processing and quantification*

900 Image analysis was performed using Fiji/ImageJ (Schindelin et al., 2012). For CESA  
901 particle density analyses, ROIs that avoid abundant Golgi signals were chosen using  
902 the Freehand selection tool. CESA particles were detected automatically on 8-bit  
903 images using the Find Maxima tool with the same noise threshold for all images. CESA  
904 particle density for each ROI was calculated by dividing the number of particles by the  
905 ROI area. For CESA particle dynamic analyses, 5-min timelapse series with 5-s  
906 intervals were collected. Average intensity projections were generated to identify the  
907 trajectories of CSC particles. Image drift was corrected by the StackReg plugin  
908 (Thevenaz et al., 1998). Kymographs were generated and velocities of CESA particles  
909 were measured as the reciprocal of the slope of individual CESA particles in  
910 kymographs. For the quantification of cortical vesicles, 1  $\mu\text{m}$  z-series stack with 0.2  $\mu\text{m}$   
911 as step size and 20-s timelapses were collected. Focal plane at 0.4  $\mu\text{m}$  below the PM  
912 was used for the cortical SmaCC analyses. The small particles show motility in  
913 timelapse series were considered as the SmaCCs. For the FRAP assay of PM-localized  
914 CSCs, a smaller area (16  $\mu\text{m}^2$ ) within the bleached region was used for analyses. The  
915 CSC delivery events during the first 5 min of recovery were manually counted according  
916 to the criteria described previously (Li et al., 2016). The particles that exhibited steady  
917 linear movement at the PM were considered as new delivery events. The CSC delivery  
918 rate was calculated by dividing the number of delivery events by the measured area and  
919 time. For the FRAP assay of CESA-containing Golgi, an area (7.1  $\mu\text{m}^2$ ) within the  
920 bleached region was used for analyses. To measure the fluorescence intensity, the  
921 integrated fluorescence at selected region at different time points was calculated by  
922 subtracting the background fluorescence outside of the cell with the same size of area.  
923 The relative fluorescence of different time points was calculated by dividing the  
924 integrated fluorescence of different time points by integrated fluorescence before

925 photobleaching. For Golgi-localized YFP-CESA6 and YFP-CESA6;ManI-CFP  
926 fluorescence analyses, 10-s timelapse series with 2-s intervals, and 1  $\mu\text{m}$  z-series stack  
927 with 0.2  $\mu\text{m}$  step size, were collected. Single Golgi which did not cluster with other Golgi  
928 and the z position with the highest fluorescence intensity and largest diameter was  
929 selected for analyses. A square box with an area of 3.5  $\mu\text{m}^2$  was drawn to include the  
930 whole Golgi for analyses. The integrated fluorescence was calculated by subtracting the  
931 background fluorescence outside of the cell with the same size of area.

932

933 *Use western blot to detect the abundance of CESA6 in transgenic lines in the absence*  
934 *and presence of ES20*

935 To quantify CESA6 protein level in different transgenic lines expressing mutated YFP-  
936 CESA6 in *prc1-1*, total proteins isolated from 6 days old light grown seedlings of  
937 different transgenic lines were used. About 50 seedlings from each transgenic line were  
938 treated with DMSO (0.1%) or ES20 (6  $\mu\text{M}$ ) for 2 hours in liquid  $\frac{1}{2}$  MS medium. After  
939 treatment, the seedlings were grounded into fine powder with liquid nitrogen and  
940 homogenized with lysis buffer (50 mM Tris-HCl, PH7.5, 150 mM NaCl, 0.5% Triton X-  
941 100, 2 mM DTT) with EDTA free protease inhibitor (Thermo Fisher) at 1:1 ratio (1 mL  
942 buffer: 1 g tissue). Homogenized samples were transferred to a 1.5 mL microcentrifuge  
943 tube and centrifuged for 30 min at 20,000 g, 4°C. The supernatant was collected after  
944 centrifugation and saved as total protein extract.

945 Isolated total protein was loaded to SDS-PAGE for western blot analysis. Anti-GFP and  
946 anti-SEC12 antibodies were used to detect CESA6 and SEC12. The western blot  
947 results were detected using x-ray film. The western blot film was converted to electronic  
948 format by scanning the film into images using a scanner (Epson Perfection V550). The  
949 image file from each x-ray film was inverted using imageJ. To measure the intensity of  
950 each protein band, a rectangle box was drawn around each band and the integrated  
951 intensity in each box was measured using imageJ. The rectangle box in the same size  
952 as protein band was used to measure the integrated intensity in the area of background.  
953 Then the background intensity was subtracted from each protein band to obtain the real  
954 intensity of each protein band. After the real intensity for each protein band is obtained,  
955 the CESA6 abundance is normalized against SEC12 abundance for each protein



956 sample by calculating the ratio of Intensity CESA6/Intensity SEC12 (R1). Then, the R1  
957 value of each lane was normalized against wildtype YFP-CESA6 DMSO sample to  
958 obtain R2 for each sample. For example,  $R2^{L365F,DMSO} = R1^{L365F,DMSO} / R1^{CESA6,DMSO}$ . The  
959 R2 values were analyzed using ANOVA to detect any difference in CESA6 abundance  
960 among different samples.

961

### 962 *ES20 synthesis*

963 General Methods: NMR spectra were recorded on Bruker spectrometers ( $^1\text{H}$  at 500  
964 MHz;  $^{13}\text{C}$  at 125 MHz. Chemical shifts ( $\delta$ ) were given in ppm with reference to solvent  
965 signals [ $^1\text{H}$  NMR:  $\text{CDCl}_3$  (7.26);  $^{13}\text{C}$  NMR:  $\text{CDCl}_3$  (77.2)]. All reactions were conducted  
966 under argon atmosphere and all solvents and reagents were used as obtained from  
967 commercial sources without further purification.

968

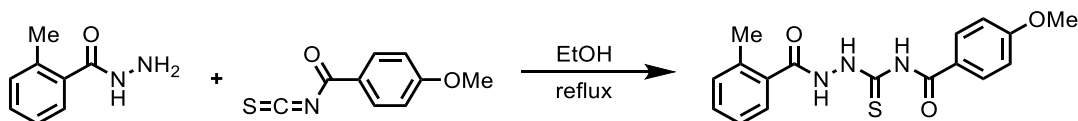

970 o-Toluic hydrazide (1.50 g, 10.0 mmol) was added to a stirred solution of ethanol (40  
971 mL) followed by 4-methoxybenzoyl isothiocyanate (1.93 g, 10.0 mmol) at room  
972 temperature. The solution was heated up to reflux under argon for 15 mins. Ethanol was  
973 removed under vacuum to give the crude product as a yellow solid. The crude product  
974 was recrystallized in ethanol to give 2.00 g purified product as a white crystal in 59%  
975 yield.

976 HRMS (ESI)  $[M + H^+]$  calculated for  $\text{C}_{17}\text{H}_{17}\text{N}_3\text{O}_3\text{S}$ : 344.1063, found: 344.1064;

977 FTIR (neat,  $\text{cm}^{-1}$ )  $\nu_{\text{max}}$  3216, 1667, 1603, 1525, 1498, 1428, 1258, 1174, 1028, 842,  
978 758;

979  $^1\text{H}$  NMR (500 MHz,  $\text{CDCl}_3$ )  $\delta$ : 9.48 (s, 1H), 8.95 (s, 1H), 7.87 (d,  $J = 8.8$  Hz, 2H), 7.60  
980 (d,  $J = 7.6$  Hz, 1H), 7.42 (t,  $J = 7.5$  Hz, 1H), 7.30 (d,  $J = 7.8$  Hz, 2H), 7.01 (d,  $J = 8.9$  Hz,  
981 2H), 3.90 (s, 3H), 2.56 (s, 3H);

982  $^{13}\text{C}$  NMR (126 MHz,  $\text{CDCl}_3$ )  $\delta$ : 171.6, 166.0, 164.4, 164.1, 137.9, 131.6, 131.4, 129.8,  
983 127.6, 126.0, 123.0, 114.5, 55.7, 20.2.

984

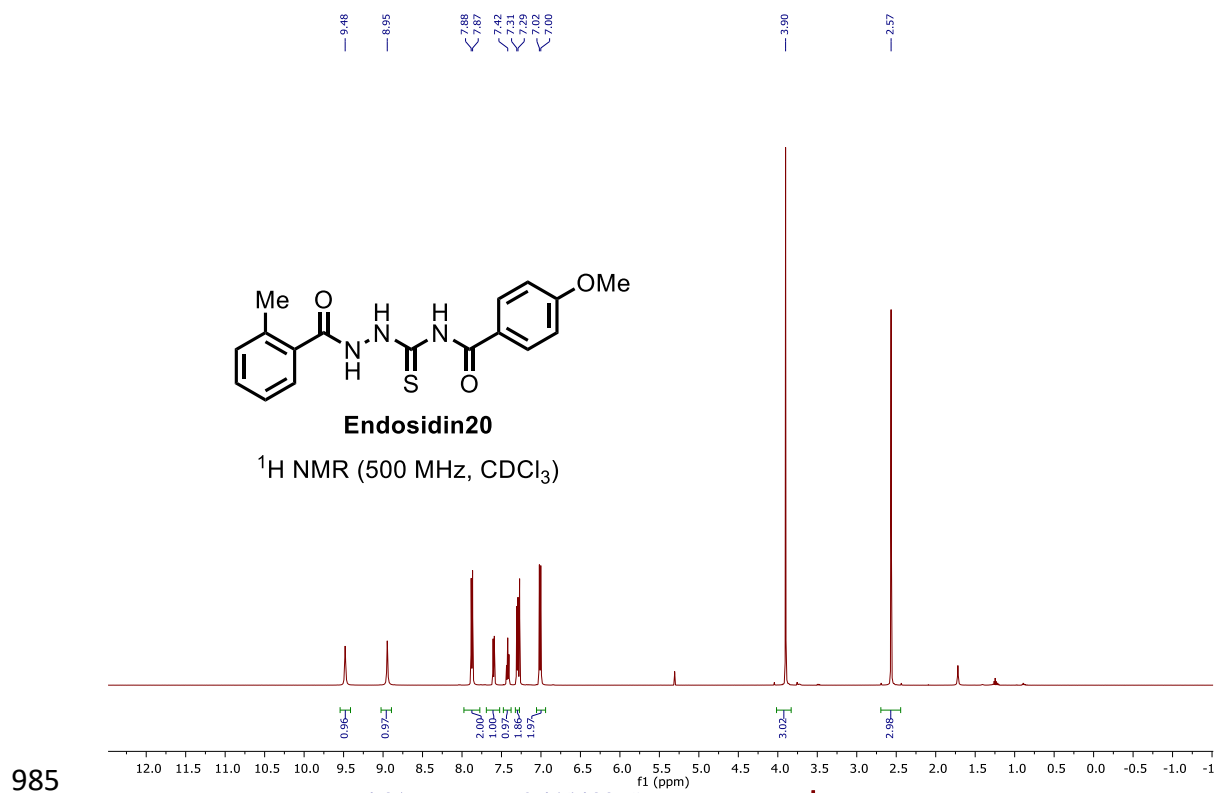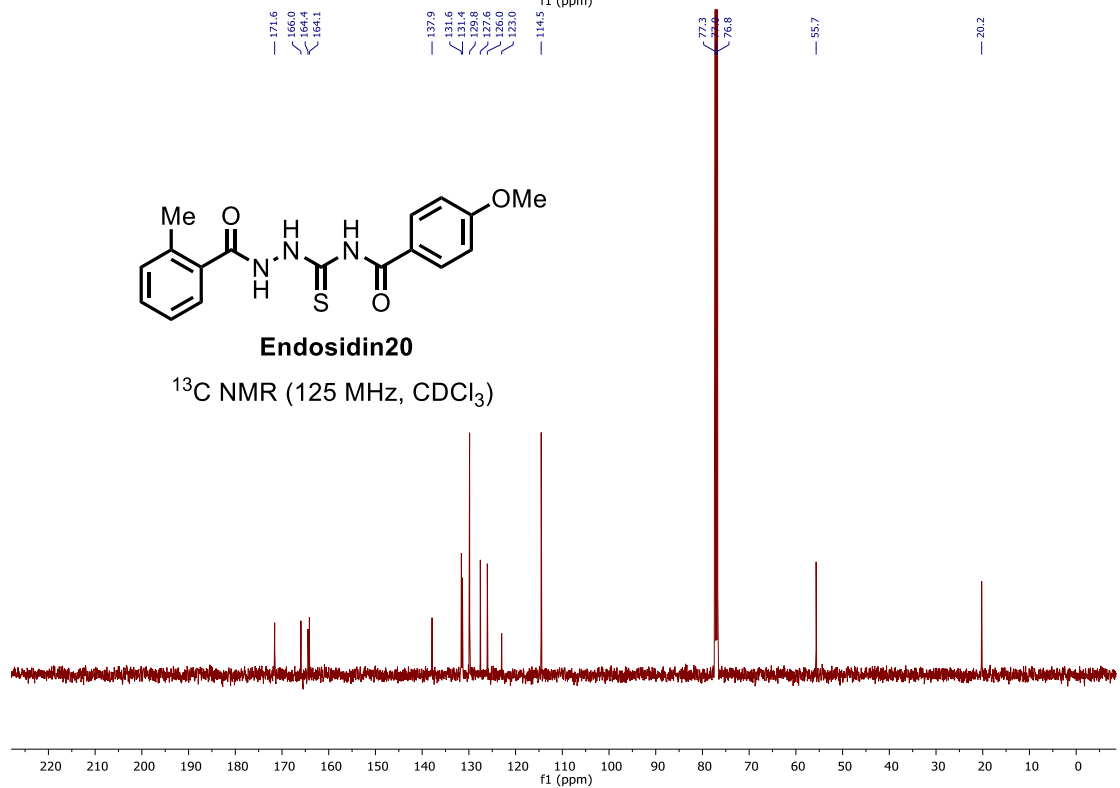

988 *Accession numbers*

989 AtCESA1, AT4G32410; AtCESA6, AT5G64740; AtCESA7, AT5G17420.



991

992 **ACKNOWLEDGEMENTS**

993 We thank Zheng-Hua Ye (University of Georgia) and Geoff Wasteneys (University of  
994 British Columbia) for providing *fra5* and *any1* seeds, respectively. We thank Ying Gu  
995 (Penn State University) for providing the YFP-CESA6;mCherry-TUA5 line. We  
996 acknowledge the Purdue Genomics facility for assistance in DNA sequencing. We are  
997 grateful to Daniel Szymanski for sharing the spinning disc confocal microscope for  
998 FRAP studies and providing us the YFP-CESA6;ManI-CFP seeds. We thank the  
999 Chemical Genomics Facility at the Purdue Institute for Drug Discovery for providing us  
1000 access to the MST equipment. We thank Yun Zhou and Tesfaye Mengiste (Purdue  
1001 University) for sharing the compound microscopes. Work in the Staiger laboratory on  
1002 imaging of YFP-CESA6 trafficking was supported by an award from the Office of  
1003 Science at the US Department of Energy, Physical Biosciences Program, under  
1004 contract number DE-FG02-09ER15526. Research in Zhang laboratory was supported  
1005 by Purdue University Provost's start-up to C. Zhang.

1006

1007 **AUTHOR CONTRIBUTION**

1008 Lei Huang performed the mutant screening, mutant phenotype characterization, genetic  
1009 complementation, CESA6 imaging and image analysis, DARTS assay, MST assay and  
1010 prepared the figures. Xiaohui Li performed cell wall analysis, structure modeling, and  
1011 molecular docking, and MST assay. Weiwei Zhang provided critical guidance for  
1012 CESA6 imaging and image analysis. Nolan Ung performed initial compound screen and  
1013 initial mutant screen. Nana Liu assisted with the biochemical assays for testing the  
1014 interaction between ES20 and CESA6. Xianglin Yin and Yong Li synthesized ES20  
1015 compound. Robert Mcewan analyzed the initial high-throughput sequencing data to  
1016 clone the first mutant gene. Brian Dilkes provided guidance for high-throughput  
1017 sequence analysis. Mingji Dai provided guidance for ES20 synthesis. Glenn Hicks and

1018 Natasha Raikhel provided guidance for initial compound screen. Christopher Staiger  
1019 provided critical guidance for CESA6 imaging and image analysis. Chunhua Zhang  
1020 designed the research and wrote the article.

1021

1022

1023 **References:**

- 1024 **Alexander, N., Woetzel, N., and Meiler, J.** (2011). bcl::Cluster : A method for  
1025 clustering biological molecules coupled with visualization in the Pymol Molecular  
1026 Graphics System. *IEEE Int Conf Comput Adv Bio Med Sci* **2011**, 13-18.
- 1027 **Arioli, T., Peng, L., Betzner, A.S., Burn, J., Wittke, W., Herth, W., Camilleri, C.,**  
1028 **Hofte, H., Plazinski, J., Birch, R., Cork, A., Glover, J., Redmond, J., and**  
1029 **Williamson, R.E.** (1998). Molecular analysis of cellulose biosynthesis in Arabidopsis.  
1030 *Science* **279**, 717-720.
- 1031 **Austin, R.S., Vidaurre, D., Stamatiou, G., Breit, R., Provart, N.J., Bonetta, D.,**  
1032 **Zhang, J., Fung, P., Gong, Y., Wang, P.W., McCourt, P., and Guttman, D.S.** (2011).  
1033 Next-generation mapping of Arabidopsis genes. *Plant J* **67**, 715-725.
- 1034 **Bar-Peled, M., and Raikhel, N.V.** (1997). Characterization of AtSEC12 and AtSAR1.  
1035 Proteins likely involved in endoplasmic reticulum and Golgi transport. *Plant Physiol* **114**,  
1036 315-324.
- 1037 **Bashline, L., Li, S., and Gu, Y.** (2014). The trafficking of the cellulose synthase  
1038 complex in higher plants. *Ann Bot* **114**, 1059-1067.
- 1039 **Baskin, T.I., Wilson, J.E., Cork, A., and Williamson, R.E.** (1994). Morphology and  
1040 microtubule organization in Arabidopsis roots exposed to oryzalin or taxol. *Plant Cell*  
1041 *Physiol* **35**, 935-942.
- 1042 **Brabham, C., Lei, L., Gu, Y., Stork, J., Barrett, M., and DeBolt, S.** (2014). Indaziflam  
1043 herbicidal action: a potent cellulose biosynthesis inhibitor. *Plant Physiol* **166**, 1177-  
1044 1185.
- 1045 **Brett, C.T.** (1978). Synthesis of beta-(1-->3)-Glucan from Extracellular Uridine  
1046 Diphosphate Glucose as a Wound Response in Suspension-cultured Soybean Cells.  
1047 *Plant Physiol* **62**, 377-382.
- 1048 **Brown, D.M., Zeef, L.A., Ellis, J., Goodacre, R., and Turner, S.R.** (2005).  
1049 Identification of novel genes in Arabidopsis involved in secondary cell wall formation  
1050 using expression profiling and reverse genetics. *Plant Cell* **17**, 2281-2295.
- 1051 **Burn, J.E., Hocart, C.H., Birch, R.J., Cork, A.C., and Williamson, R.E.** (2002).  
1052 Functional analysis of the cellulose synthase genes Cesa1, Cesa2, and Cesa3 in  
1053 Arabidopsis. *Plant Physiol* **129**, 797-807.
- 1054 **Cano-Delgado, A., Penfield, S., Smith, C., Catley, M., and Bevan, M.** (2003).  
1055 Reduced cellulose synthesis invokes lignification and defense responses in Arabidopsis  
1056 thaliana. *Plant J* **34**, 351-362.
- 1057 **Chin, R.M., Fu, X., Pai, M.Y., Vergnes, L., Hwang, H., Deng, G., Diep, S., Lomenick,**  
1058 **B., Meli, V.S., Monsalve, G.C., Hu, E., Whelan, S.A., Wang, J.X., Jung, G., Solis,**  
1059 **G.M., Fazlollahi, F., Kaweeteerawat, C., Quach, A., Nili, M., Krall, A.S., Godwin,**  
1060 **H.A., Chang, H.R., Faull, K.F., Guo, F., Jiang, M., Trauger, S.A., Saghatelian, A.,**

- 1061 **Braas, D., Christofk, H.R., Clarke, C.F., Teitell, M.A., Petrascheck, M., Reue, K.,**  
1062 **Jung, M.E., Frand, A.R., and Huang, J.** (2014). The metabolite alpha-ketoglutarate  
1063 extends lifespan by inhibiting ATP synthase and TOR. *Nature* **510**, 397-401.
- 1064 **Cho, M., Lee, S.H., and Cho, H.T.** (2007). P-glycoprotein4 displays auxin efflux  
1065 transporter-like action in Arabidopsis root hair cells and tobacco cells. *Plant Cell* **19**,  
1066 3930-3943.
- 1067 **Clough, S.J., and Bent, A.F.** (1998). Floral dip: a simplified method for Agrobacterium-  
1068 mediated transformation of Arabidopsis thaliana. *Plant J* **16**, 735-743.
- 1069 **Crowell, E.F., Bischoff, V., Desprez, T., Rolland, A., Stierhof, Y.D., Schumacher, K.,**  
1070 **Gonneau, M., Hofte, H., and Vernhettes, S.** (2009). Pausing of Golgi bodies on  
1071 microtubules regulates secretion of cellulose synthase complexes in Arabidopsis. *Plant*  
1072 *Cell* **21**, 1141-1154.
- 1073 **Cutler, S.R., Ehrhardt, D.W., Griffiths, J.S., and Somerville, C.R.** (2000). Random  
1074 GFP::cDNA fusions enable visualization of subcellular structures in cells of Arabidopsis  
1075 at a high frequency. *Proc Natl Acad Sci U S A* **97**, 3718-3723.
- 1076 **Dallakyan, S., and Olson, A.J.** (2015). Small-molecule library screening by docking  
1077 with PyRx. *Methods Mol Biol* **1263**, 243-250.
- 1078 **Daras, G., Rigas, S., Penning, B., Milioni, D., McCann, M.C., Carpita, N.C., Fasseas,**  
1079 **C., and Hatzopoulos, P.** (2009). The thanatos mutation in Arabidopsis thaliana  
1080 cellulose synthase 3 (AtCesA3) has a dominant-negative effect on cellulose synthesis  
1081 and plant growth. *New Phytol* **184**, 114-126.
- 1082 **DeBolt, S., Gutierrez, R., Ehrhardt, D.W., and Somerville, C.** (2007a). Nonmotile  
1083 cellulose synthase subunits repeatedly accumulate within localized regions at the  
1084 plasma membrane in Arabidopsis hypocotyl cells following 2,6-dichlorobenzonitrile  
1085 treatment. *Plant Physiol* **145**, 334-338.
- 1086 **DeBolt, S., Gutierrez, R., Ehrhardt, D.W., Melo, C.V., Ross, L., Cutler, S.R.,**  
1087 **Somerville, C., and Bonetta, D.** (2007b). Morlin, an inhibitor of cortical microtubule  
1088 dynamics and cellulose synthase movement. *Proc Natl Acad Sci U S A* **104**, 5854-5859.
- 1089 **Decker, D., Oberg, C., and Kleczkowski, L.A.** (2017). Identification and  
1090 characterization of inhibitors of UDP-glucose and UDP-sugar pyrophosphorylases for in  
1091 vivo studies. *Plant J* **90**, 1093-1107.
- 1092 **Dejonghe, W., Sharma, I., Denoo, B., De Munck, S., Lu, Q., Mishev, K., Bulut, H.,**  
1093 **Mylle, E., De Rycke, R., Vasileva, M., Savatin, D.V., Nerinckx, W., Staes, A.,**  
1094 **Drozdzecki, A., Audenaert, D., Yperman, K., Madder, A., Friml, J., Van Damme, D.,**  
1095 **Gevaert, K., Haucke, V., Savvides, S.N., Winne, J., and Russinova, E.** (2019).  
1096 Disruption of endocytosis through chemical inhibition of clathrin heavy chain function.  
1097 *Nat Chem Biol* **15**, 641-649.
- 1098 **Desprez, T., Vernhettes, S., Fagard, M., Refregier, G., Desnos, T., Aletti, E., Py, N.,**  
1099 **Pelletier, S., and Hofte, H.** (2002). Resistance against herbicide isoxaben and  
1100 cellulose deficiency caused by distinct mutations in same cellulose synthase isoform  
1101 CESA6. *Plant Physiol* **128**, 482-490.
- 1102 **Desprez, T., Juraniec, M., Crowell, E.F., Jouy, H., Pochylova, Z., Parcy, F., Hofte,**  
1103 **H., Gonneau, M., and Vernhettes, S.** (2007). Organization of cellulose synthase  
1104 complexes involved in primary cell wall synthesis in Arabidopsis thaliana. *Proc Natl*  
1105 *Acad Sci U S A* **104**, 15572-15577.

- 1106 **Dettmer, J., Hong-Hermesdorf, A., Stierhof, Y.D., and Schumacher, K.** (2006).  
1107 Vacuolar H<sup>+</sup>-ATPase activity is required for endocytic and secretory trafficking in  
1108 Arabidopsis. *Plant Cell* **18**, 715-730.
- 1109 **Doblin, M.S., Kurek, I., Jacob-Wilk, D., and Delmer, D.P.** (2002). Cellulose  
1110 biosynthesis in plants: from genes to rosettes. *Plant Cell Physiol* **43**, 1407-1420.
- 1111 **Drakakaki, G., Robert, S., Szatmari, A.M., Brown, M.Q., Nagawa, S., Van Damme,**  
1112 **D., Leonard, M., Yang, Z., Girke, T., Schmid, S.L., Russinova, E., Friml, J., Raikhel,**  
1113 **N.V., and Hicks, G.R.** (2011). Clusters of bioactive compounds target dynamic  
1114 endomembrane networks in vivo. *Proc Natl Acad Sci U S A* **108**, 17850-17855.
- 1115 **Fagard, M., Desnos, T., Desprez, T., Goubet, F., Refregier, G., Mouille, G., McCann,**  
1116 **M., Rayon, C., Vernhettes, S., and Hofte, H.** (2000). PROCUSTE1 encodes a  
1117 cellulose synthase required for normal cell elongation specifically in roots and dark-  
1118 grown hypocotyls of Arabidopsis. *Plant Cell* **12**, 2409-2424.
- 1119 **Farquharson, K.L.** (2009). Cortical microtubules regulate the insertion of cellulose  
1120 synthase complexes in the plasma membrane. *Plant Cell* **21**, 1028.
- 1121 **Fernandes, A.N., Thomas, L.H., Altaner, C.M., Callow, P., Forsyth, V.T., Apperley,**  
1122 **D.C., Kennedy, C.J., and Jarvis, M.C.** (2011). Nanostructure of cellulose microfibrils in  
1123 spruce wood. *Proc Natl Acad Sci U S A* **108**, E1195-1203.
- 1124 **Foster, C.E., Martin, T.M., and Pauly, M.** (2010). Comprehensive compositional  
1125 analysis of plant cell walls (lignocellulosic biomass) part II: carbohydrates. *J Vis Exp.*
- 1126 **Fu, Y., Xu, T., Zhu, L., Wen, M., and Yang, Z.** (2009). A ROP GTPase signaling  
1127 pathway controls cortical microtubule ordering and cell expansion in Arabidopsis. *Curr*  
1128 *Biol* **19**, 1827-1832.
- 1129 **Fujita, M., Himmelspach, R., Ward, J., Whittington, A., Hasenbein, N., Liu, C.,**  
1130 **Truong, T.T., Galway, M.E., Mansfield, S.D., Hocart, C.H., and Wasteneys, G.O.**  
1131 (2013). The anisotropy1 D604N mutation in the Arabidopsis cellulose synthase1  
1132 catalytic domain reduces cell wall crystallinity and the velocity of cellulose synthase  
1133 complexes. *Plant Physiol* **162**, 74-85.
- 1134 **Gardiner, J.C., Taylor, N.G., and Turner, S.R.** (2003). Control of cellulose synthase  
1135 complex localization in developing xylem. *Plant Cell* **15**, 1740-1748.
- 1136 **Geldner, N., Denervaud-Tendon, V., Hyman, D.L., Mayer, U., Stierhof, Y.D., and**  
1137 **Chory, J.** (2009). Rapid, combinatorial analysis of membrane compartments in intact  
1138 plants with a multicolor marker set. *Plant J* **59**, 169-178.
- 1139 **Giddings, T.H., Jr., Brower, D.L., and Staehelin, L.A.** (1980). Visualization of particle  
1140 complexes in the plasma membrane of *Micrasterias denticulata* associated with the  
1141 formation of cellulose fibrils in primary and secondary cell walls. *J Cell Biol* **84**, 327-339.
- 1142 **Gonneau, M., Desprez, T., Guillot, A., Vernhettes, S., and Hofte, H.** (2014). Catalytic  
1143 subunit stoichiometry within the cellulose synthase complex. *Plant Physiol* **166**, 1709-  
1144 1712.
- 1145 **Gutierrez, R., Lindeboom, J.J., Paredes, A.R., Emons, A.M., and Ehrhardt, D.W.**  
1146 (2009). Arabidopsis cortical microtubules position cellulose synthase delivery to the  
1147 plasma membrane and interact with cellulose synthase trafficking compartments. *Nat*  
1148 *Cell Biol* **11**, 797-806.
- 1149 **Haigler, C.H., and Brown, R.M.J.** (1986). Transport of rosettes from the Golgi  
1150 apparatus to the plasma membrane in isolated mesophyll cells of *Zinnia elegans* during  
1151 differentiation to tracheary elements in suspension culture. *Protoplasma* **134**, 111-120.



- 1152 **Harris, D.M., Corbin, K., Wang, T., Gutierrez, R., Bertolo, A.L., Petti, C., Smilgies,**  
1153 **D.M., Estevez, J.M., Bonetta, D., Urbanowicz, B.R., Ehrhardt, D.W., Somerville,**  
1154 **C.R., Rose, J.K., Hong, M., and Debolt, S.** (2012). Cellulose microfibril crystallinity is  
1155 reduced by mutating C-terminal transmembrane region residues CESA1A903V and  
1156 CESA3T942I of cellulose synthase. *Proc Natl Acad Sci U S A* **109**, 4098-4103.
- 1157 **Heim, D.R., Roberts, J.L., Pike, P.D., and Larrinua, I.M.** (1989). Mutation of a Locus  
1158 of *Arabidopsis thaliana* Confers Resistance to the Herbicide Isoxaben. *Plant Physiol* **90**,  
1159 146-150.
- 1160 **Hill, J.L., Jr., Hammudi, M.B., and Tien, M.** (2014). The *Arabidopsis* cellulose  
1161 synthase complex: a proposed hexamer of CESA trimers in an equimolar stoichiometry.  
1162 *Plant Cell* **26**, 4834-4842.
- 1163 **Hu, Z., Zhang, T., Rombaut, D., Decaestecker, W., Xing, A., D'Haeyer, S., Hofer, R.,**  
1164 **Vercauteren, I., Karimi, M., Jacobs, T., and De Veylder, L.** (2019). Genome Editing-  
1165 Based Engineering of CESA3 Dual Cellulose-Inhibitor-Resistant Plants. *Plant Physiol*  
1166 **180**, 827-836.
- 1167 **Hu, Z., Vanderhaeghen, R., Cools, T., Wang, Y., De Clercq, I., Leroux, O., Nguyen,**  
1168 **L., Belt, K., Millar, A.H., Audenaert, D., Hilson, P., Small, I., Mouille, G., Vernhettes,**  
1169 **S., Van Breusegem, F., Whelan, J., Hofte, H., and De Veylder, L.** (2016).  
1170 Mitochondrial Defects Confer Tolerance against Cellulose Deficiency. *Plant Cell* **28**,  
1171 2276-2290.
- 1172 **Kania, U., Nodzynski, T., Lu, Q., Hicks, G.R., Nerinckx, W., Mishev, K., Peurois, F.,**  
1173 **Cherfils, J., De Rycke, R., Grones, P., Robert, S., Russinova, E., and Friml, J.**  
1174 (2018). The Inhibitor Endosidin 4 Targets SEC7 Domain-Type ARF GTPase Exchange  
1175 Factors and Interferes with Subcellular Trafficking in Eukaryotes. *Plant Cell* **30**, 2553-  
1176 2572.
- 1177 **Kim, Y., Schumaker, K.S., and Zhu, J.K.** (2006). EMS mutagenesis of *Arabidopsis*.  
1178 *Methods Mol Biol* **323**, 101-103.
- 1179 **Laskowski, R.A., MacArthur, M.W., Moss, D.S., and Thornton, J.M.** (1993).  
1180 PROCHECK: a program to check the stereochemical quality of protein structures. *J.*  
1181 *Appl. Cryst.* **26**, 283-291.
- 1182 **Laskowski, R.A., Rullmann, J.A., MacArthur, M.W., Kaptein, R., and Thornton,**  
1183 **J.M.** (1996). AQUA and PROCHECK-NMR: programs for checking the quality of protein  
1184 structures solved by NMR. *J Biomol NMR* **8**, 477-486.
- 1185 **Lei, L., Singh, A., Bashline, L., Li, S., Yingling, Y.G., and Gu, Y.** (2015).  
1186 CELLULOSE SYNTHASE INTERACTIVE1 Is Required for Fast Recycling of Cellulose  
1187 Synthase Complexes to the Plasma Membrane in *Arabidopsis*. *Plant Cell* **27**, 2926-  
1188 2940.
- 1189 **Li, R., Rodriguez-Furlan, C., Wang, J., van de Ven, W., Gao, T., Raikhel, N.V., and**  
1190 **Hicks, G.R.** (2017). Different Endomembrane Trafficking Pathways Establish Apical and  
1191 Basal Polarities. *Plant Cell* **29**, 90-108.
- 1192 **Li, S., Lei, L., Somerville, C.R., and Gu, Y.** (2012). Cellulose synthase interactive  
1193 protein 1 (CSI1) links microtubules and cellulose synthase complexes. *Proc Natl Acad*  
1194 *Sci U S A* **109**, 185-190.
- 1195 **Li, S., Bashline, L., Zheng, Y., Xin, X., Huang, S., Kong, Z., Kim, S.H., Cosgrove,**  
1196 **D.J., and Gu, Y.** (2016). Cellulose synthase complexes act in a concerted fashion to



1197 synthesize highly aggregated cellulose in secondary cell walls of plants. *Proc Natl Acad*  
1198 *Sci U S A* **113**, 11348-11353.

1199 **Lomenick, B., Hao, R., Jonai, N., Chin, R.M., Aghajan, M., Warburton, S., Wang, J.,**  
1200 **Wu, R.P., Gomez, F., Loo, J.A., Wohlschlegel, J.A., Vondriska, T.M., Pelletier, J.,**  
1201 **Herschman, H.R., Clardy, J., Clarke, C.F., and Huang, J.** (2009). Target identification  
1202 using drug affinity responsive target stability (DARTS). *Proc Natl Acad Sci U S A* **106**,  
1203 21984-21989.

1204 **Luo, Y., Scholl, S., Doering, A., Zhang, Y., Irani, N.G., Rubbo, S.D., Neumetzler, L.,**  
1205 **Krishnamoorthy, P., Van Houtte, I., Mylle, E., Bischoff, V., Vernhettes, S., Winne,**  
1206 **J., Friml, J., Stierhof, Y.D., Schumacher, K., Persson, S., and Russinova, E.** (2015).  
1207 V-ATPase activity in the TGN/EE is required for exocytosis and recycling in Arabidopsis.  
1208 *Nat Plants* **1**, 15094.

1209 **Matsushima, R., Kondo, M., Nishimura, M., and Hara-Nishimura, I.** (2003). A novel  
1210 ER-derived compartment, the ER body, selectively accumulates a beta-glucosidase with  
1211 an ER-retention signal in Arabidopsis. *Plant J* **33**, 493-502.

1212 **McFarlane, H.E., Doring, A., and Persson, S.** (2014). The cell biology of cellulose  
1213 synthesis. *Annu Rev Plant Biol* **65**, 69-94.

1214 **Mishev, K., Lu, Q., Denoo, B., Peurois, F., Dejonghe, W., Hullaert, J., De Rycke, R.,**  
1215 **Boeren, S., Bretou, M., De Munck, S., Sharma, I., Goodman, K., Kalinowska, K.,**  
1216 **Storme, V., Nguyen, L.S.L., Drozdzecki, A., Martins, S., Nerinckx, W., Audenaert,**  
1217 **D., Vert, G., Madder, A., Otegui, M.S., Isono, E., Savvides, S.N., Annaert, W., De**  
1218 **Vries, S., Cherfils, J., Winne, J., and Russinova, E.** (2018). Nonselective Chemical  
1219 Inhibition of Sec7 Domain-Containing ARF GTPase Exchange Factors. *Plant Cell* **30**,  
1220 2573-2593.

1221 **Montezinos, D., and Delmer, D.P.** (1980). Characterization of inhibitors of cellulose  
1222 synthesis in cotton fibers. *Planta* **148**, 305-311.

1223 **Morgan, J.L., Strumillo, J., and Zimmer, J.** (2013). Crystallographic snapshot of  
1224 cellulose synthesis and membrane translocation. *Nature* **493**, 181-186.

1225 **Morgan, J.L., McNamara, J.T., and Zimmer, J.** (2014). Mechanism of activation of  
1226 bacterial cellulose synthase by cyclic di-GMP. *Nat Struct Mol Biol* **21**, 489-496.

1227 **Morgan, J.L., McNamara, J.T., Fischer, M., Rich, J., Chen, H.M., Withers, S.G., and**  
1228 **Zimmer, J.** (2016). Observing cellulose biosynthesis and membrane translocation in  
1229 crystallo. *Nature* **531**, 329-334.

1230 **Mueller, S.C., and Brown, R.M., Jr.** (1980). Evidence for an intramembrane  
1231 component associated with a cellulose microfibril-synthesizing complex in higher plants.  
1232 *J Cell Biol* **84**, 315-326.

1233 **Mueller, S.C., Brown, R.M., Jr., and Scott, T.K.** (1976). Cellulosic microfibrils: nascent  
1234 stages of synthesis in a higher plant cell. *Science* **194**, 949-951.

1235 **Newman, R.H., Hill, S.J., and Harris, P.J.** (2013). Wide-angle x-ray scattering and  
1236 solid-state nuclear magnetic resonance data combined to test models for cellulose  
1237 microfibrils in mung bean cell walls. *Plant Physiol* **163**, 1558-1567.

1238 **Nixon, B.T., Mansouri, K., Singh, A., Du, J., Davis, J.K., Lee, J.G., Slabaugh, E.,**  
1239 **Vandavasi, V.G., O'Neill, H., Roberts, E.M., Roberts, A.W., Yingling, Y.G., and**  
1240 **Haigler, C.H.** (2016). Comparative Structural and Computational Analysis Supports  
1241 Eighteen Cellulose Synthases in the Plant Cellulose Synthesis Complex. *Sci Rep* **6**,  
1242 28696.

- 1243 **Omadjela, O., Narahari, A., Strumillo, J., Melida, H., Mazur, O., Bulone, V., and**  
1244 **Zimmer, J.** (2013). BcsA and BcsB form the catalytically active core of bacterial  
1245 cellulose synthase sufficient for in vitro cellulose synthesis. *Proc Natl Acad Sci U S A*  
1246 **110**, 17856-17861.
- 1247 **Paredes, A.R., Somerville, C.R., and Ehrhardt, D.W.** (2006). Visualization of cellulose  
1248 synthase demonstrates functional association with microtubules. *Science* **312**, 1491-  
1249 1495.
- 1250 **Park, J.I., Ishimizu, T., Suwabe, K., Sudo, K., Masuko, H., Hakozi, H., Nou, I.S.,**  
1251 **Suzuki, G., and Watanabe, M.** (2010). UDP-glucose pyrophosphorylase is rate limiting  
1252 in vegetative and reproductive phases in *Arabidopsis thaliana*. *Plant Cell Physiol* **51**,  
1253 981-996.
- 1254 **Park, S., Song, B., Shen, W., and Ding, S.Y.** (2019). A mutation in the catalytic  
1255 domain of Cellulose synthase 6 halts its transport to the Golgi apparatus. *J Exp Bot.*
- 1256 **Pear, J.R., Kawagoe, Y., Schreckengost, W.E., Delmer, D.P., and Stalker, D.M.**  
1257 (1996). Higher plants contain homologs of the bacterial *celA* genes encoding the  
1258 catalytic subunit of cellulose synthase. *Proc Natl Acad Sci U S A* **93**, 12637-12642.
- 1259 **Persson, S., Paredes, A., Carroll, A., Palsdottir, H., Doblin, M., Poindexter, P.,**  
1260 **Khitrov, N., Auer, M., and Somerville, C.R.** (2007). Genetic evidence for three unique  
1261 components in primary cell-wall cellulose synthase complexes in *Arabidopsis*. *Proc Natl*  
1262 *Acad Sci U S A* **104**, 15566-15571.
- 1263 **Polko, J.K., Barnes, W.J., Voiniciuc, C., Doctor, S., Steinwand, B., Hill, J.L., Jr.,**  
1264 **Tien, M., Pauly, M., Anderson, C.T., and Kieber, J.J.** (2018). SHOU4 Proteins  
1265 Regulate Trafficking of Cellulose Synthase Complexes to the Plasma Membrane. *Curr*  
1266 *Biol* **28**, 3174-3182 e3176.
- 1267 **Pradhan Mitra, P., and Loque, D.** (2014). Histochemical staining of *Arabidopsis*  
1268 *thaliana* secondary cell wall elements. *J Vis Exp*.
- 1269 **Qu, Y., Gharbi, N., Yuan, X., Olsen, J.R., Blicher, P., Dalhus, B., Brokstad, K.A.,**  
1270 **Lin, B., Oyan, A.M., Zhang, W., Kalland, K.H., and Ke, X.** (2016). Axitinib blocks  
1271 Wnt/beta-catenin signaling and directs asymmetric cell division in cancer. *Proc Natl*  
1272 *Acad Sci U S A* **113**, 9339-9344.
- 1273 **Rodriguez-Furlan, C., Domozych, D., Qian, W., Enquist, P.A., Li, X., Zhang, C.,**  
1274 **Schenk, R., Winbigler, H.S., Jackson, W., Raikhel, N.V., and Hicks, G.R.** (2019).  
1275 Interaction between VPS35 and RABG3f is necessary as a checkpoint to control fusion  
1276 of late compartments with the vacuole. *Proc Natl Acad Sci U S A* **116**, 21291-21301.
- 1277 **Roy, A., Kucukural, A., and Zhang, Y.** (2010). I-TASSER: a unified platform for  
1278 automated protein structure and function prediction. *Nat Protoc* **5**, 725-738.
- 1279 **Sampathkumar, A., Gutierrez, R., McFarlane, H.E., Bringmann, M., Lindeboom, J.,**  
1280 **Emons, A.M., Samuels, L., Ketelaar, T., Ehrhardt, D.W., and Persson, S.** (2013).  
1281 Patterning and lifetime of plasma membrane-localized cellulose synthase is dependent  
1282 on actin organization in *Arabidopsis* interphase cells. *Plant Physiol* **162**, 675-688.
- 1283 **Scheible, W.R., Eshed, R., Richmond, T., Delmer, D., and Somerville, C.** (2001).  
1284 Modifications of cellulose synthase confer resistance to isoxaben and thiazolidinone  
1285 herbicides in *Arabidopsis* *lxr1* mutants. *Proc Natl Acad Sci U S A* **98**, 10079-10084.
- 1286 **Schindelin, J., Arganda-Carreras, I., Frise, E., Kaynig, V., Longair, M., Pietzsch, T.,**  
1287 **Preibisch, S., Rueden, C., Saalfeld, S., Schmid, B., Tinevez, J.Y., White, D.J.,**

- 1288 **Hartenstein, V., Eliceiri, K., Tomancak, P., and Cardona, A.** (2012). Fiji: an open-  
1289 source platform for biological-image analysis. *Nat Methods* **9**, 676-682.
- 1290 **Sethaphong, L., Haigler, C.H., Kubicki, J.D., Zimmer, J., Bonetta, D., DeBolt, S.,**  
1291 **and Yingling, Y.G.** (2013). Tertiary model of a plant cellulose synthase. *Proc Natl Acad*  
1292 *Sci U S A* **110**, 7512-7517.
- 1293 **Slabaugh, E., Sethaphong, L., Xiao, C., Amick, J., Anderson, C.T., Haigler, C.H.,**  
1294 **and Yingling, Y.G.** (2014). Computational and genetic evidence that different structural  
1295 conformations of a non-catalytic region affect the function of plant cellulose synthase. *J*  
1296 *Exp Bot* **65**, 6645-6653.
- 1297 **Susette, M.C., and Gordon, M.M.** (1983). Radioautographic visualization of  $\beta$ -glucans  
1298 formed by pea membranes from UDP-glucose. *Canadian Journal of Botany* **61**, 1266-  
1299 1275.
- 1300 **Tateno, M., Brabham, C., and DeBolt, S.** (2016). Cellulose biosynthesis inhibitors - a  
1301 multifunctional toolbox. *J Exp Bot* **67**, 533-542.
- 1302 **Taylor, N.G., Howells, R.M., Huttly, A.K., Vickers, K., and Turner, S.R.** (2003).  
1303 Interactions among three distinct CesA proteins essential for cellulose synthesis. *Proc*  
1304 *Natl Acad Sci U S A* **100**, 1450-1455.
- 1305 **Thevenaz, P., Ruttimann, U.E., and Unser, M.** (1998). A pyramid approach to subpixel  
1306 registration based on intensity. *IEEE Trans Image Process* **7**, 27-41.
- 1307 **Tran, M.L., McCarthy, T.W., Sun, H., Wu, S.Z., Norris, J.H., Bezanilla, M., Vidali, L.,**  
1308 **Anderson, C.T., and Roberts, A.W.** (2018). Direct observation of the effects of  
1309 cellulose synthesis inhibitors using live cell imaging of Cellulose Synthase (CESA) in  
1310 *Physcomitrella patens*. *Sci Rep* **8**, 735.
- 1311 **Trott, O., and Olson, A.J.** (2010). AutoDock Vina: improving the speed and accuracy of  
1312 docking with a new scoring function, efficient optimization, and multithreading. *J Comput*  
1313 *Chem* **31**, 455-461.
- 1314 **Updegraff, D.M.** (1969). Semimicro determination of cellulose in biological materials.  
1315 *Anal Biochem* **32**, 420-424.
- 1316 **Vergara, C.E., and Carpita, N.C.** (2001). Beta-D-glycan synthases and the CesA gene  
1317 family: lessons to be learned from the mixed-linkage (1-->3),(1-->4)beta-D-glucan  
1318 synthase. *Plant Mol Biol* **47**, 145-160.
- 1319 **Worden, N., Wilkop, T.E., Esteve, V.E., Jeannotte, R., Lathe, R., Vernhettes, S.,**  
1320 **Weimer, B., Hicks, G., Alonso, J., Labavitch, J., Persson, S., Ehrhardt, D., and**  
1321 **Drakakaki, G.** (2015). CESA trafficking inhibitor inhibits cellulose deposition and  
1322 interferes with the trafficking of cellulose synthase complexes and their associated  
1323 proteins KORRIGAN1 and POM2/CELLULOSE SYNTHASE INTERACTIVE  
1324 PROTEIN1. *Plant Physiol* **167**, 381-393.
- 1325 **Xu, J., and Scheres, B.** (2005). Dissection of Arabidopsis ADP-RIBOSYLATION  
1326 FACTOR 1 function in epidermal cell polarity. *Plant Cell* **17**, 525-536.
- 1327 **Yang, J., Roy, A., and Zhang, Y.** (2013a). Protein-ligand binding site recognition using  
1328 complementary binding-specific substructure comparison and sequence profile  
1329 alignment. *Bioinformatics* **29**, 2588-2595.
- 1330 **Yang, J., Roy, A., and Zhang, Y.** (2013b). BioLiP: a semi-manually curated database  
1331 for biologically relevant ligand-protein interactions. *Nucleic Acids Res* **41**, D1096-1103.
- 1332 **Yang, J., Yan, R., Roy, A., Xu, D., Poisson, J., and Zhang, Y.** (2015). The I-TASSER  
1333 Suite: protein structure and function prediction. *Nat Methods* **12**, 7-8.

1334 **Zhang, C., Brown, M.Q., van de Ven, W., Zhang, Z.M., Wu, B., Young, M.C., Synek,**  
1335 **L., Borchardt, D., Harrison, R., Pan, S., Luo, N., Huang, Y.M., Ghang, Y.J., Ung, N.,**  
1336 **Li, R., Isley, J., Morikis, D., Song, J., Guo, W., Hooley, R.J., Chang, C.E., Yang, Z.,**  
1337 **Zarsky, V., Muday, G.K., Hicks, G.R., and Raikhel, N.V. (2016a).** Endosidin2 targets  
1338 conserved exocyst complex subunit EXO70 to inhibit exocytosis. *Proc Natl Acad Sci U*  
1339 *S A* **113**, E41-50.

1340 **Zhang, W., Cai, C., and Staiger, C.J. (2019).** Myosins XI Are Involved in Exocytosis of  
1341 Cellulose Synthase Complexes. *Plant Physiol*.

1342 **Zhang, Y., Nikolovski, N., Sorieul, M., Vellosillo, T., McFarlane, H.E., Dupree, R.,**  
1343 **Kesten, C., Schneider, R., Driemeier, C., Lathe, R., Lampugnani, E., Yu, X., Ivakov,**  
1344 **A., Doblin, M.S., Mortimer, J.C., Brown, S.P., Persson, S., and Dupree, P. (2016b).**  
1345 Golgi-localized STELLO proteins regulate the assembly and trafficking of cellulose  
1346 synthase complexes in Arabidopsis. *Nat Commun* **7**, 11656.

1347 **Zhong, R., Morrison, W.H., 3rd, Freshour, G.D., Hahn, M.G., and Ye, Z.H. (2003).**  
1348 Expression of a mutant form of cellulose synthase AtCesA7 causes dominant negative  
1349 effect on cellulose biosynthesis. *Plant Physiol* **132**, 786-795.

1350 **Zhu, X., Li, S., Pan, S., Xin, X., and Gu, Y. (2018).** CS11, PATROL1, and exocyst  
1351 complex cooperate in delivery of cellulose synthase complexes to the plasma  
1352 membrane. *Proc Natl Acad Sci U S A* **115**, E3578-E3587.

1353 **Zou, M., Ren, H., and Li, J. (2019).** An Auxin Transport Inhibitor Targets Villin-  
1354 Mediated Actin Dynamics to Regulate Polar Auxin Transport. *Plant Physiol* **181**, 161-  
1355 178.

1356

## Figure 1

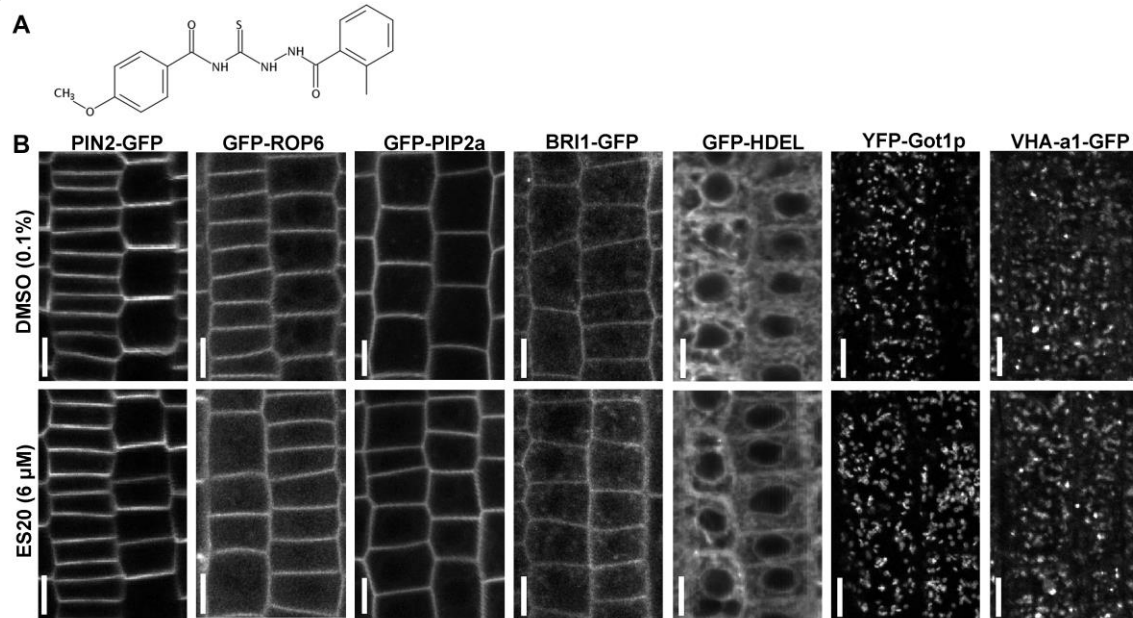

**Figure 1.** ES20 does not disrupt the general endomembrane system of plants. **A**, Molecular structure of ES20. **B**, Representative images of cellular localization of different organelle marker proteins in 5-day-old transgenic plants after treatment with 0.1% DMSO or 6  $\mu$ M ES20 for 2 h in root epidermal cells from the elongation zone. PIN2-GFP, GFP-ROP6, GFP-PIP2a, and BRI1-GFP were used as PM marker proteins. GFP-HDEL was used as an ER marker protein. YFP-Got1p (Golgi transporter 1 protein) was used as a Golgi marker protein. VHA-a1-GFP (v-type proton ATPase subunit a1) was used as a TGN/EE marker protein. Scale bars: 10  $\mu$ m.



**Figure 2**

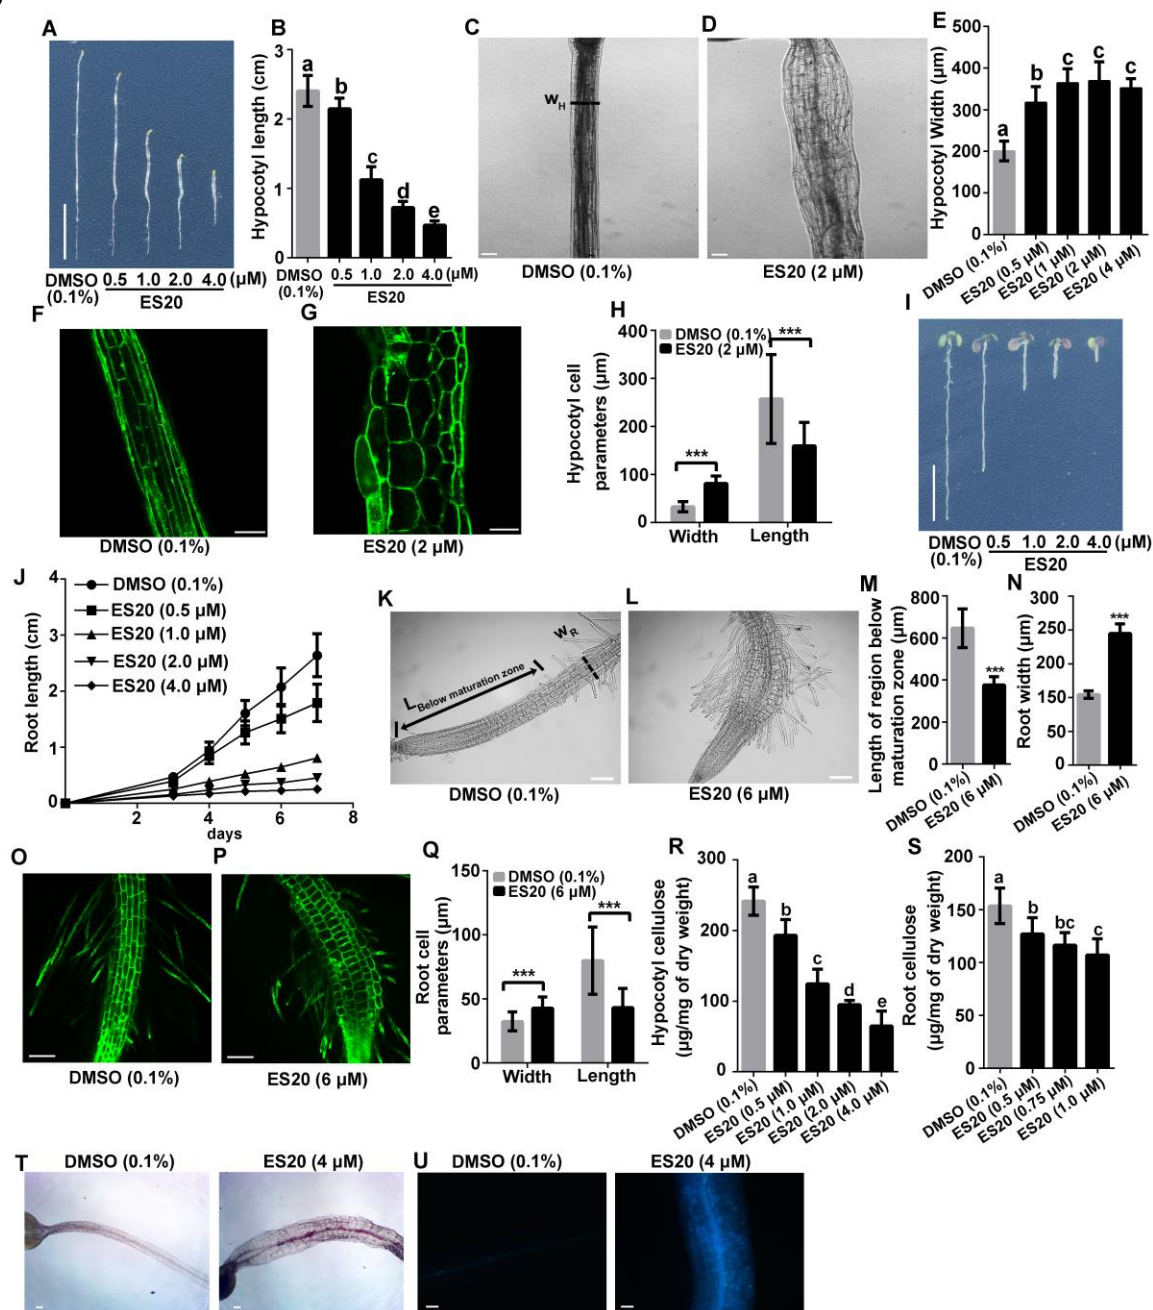

content in cell walls of dark-grown hypocotyls (**R**) and light-grown roots (**S**) in a dose-dependent manner. **T**. ES20 treatment causes accumulation of lignin. Representative images of 3 days old Col-0 seedlings grown on 1/2 MS supplemented with DMSO or 4  $\mu$ M ES20 in dark stained with Phloroglucinol. **U**, ES20 treatment causes accumulation of callose. Representative images of 3 days old Col-0 seedlings grown on 1/2 MS supplemented with DMSO or 4  $\mu$ M ES20 in dark stained with aniline blue. The letters in **B**, **E**, **R**, and **S** indicate statistically significant differences determined by one-way ANOVA tests followed by Tukey's multiple comparison tests in different samples. Different letters indicate significant differences between groups ( $p < 0.05$ ). \*\*\* in **H**, **M**, **N** and **Q**,  $p < 0.001$  by two-tailed student's *t* test. Error bars: mean  $\pm$  SD, with  $n = 20$  for **B** and **E**,  $n = 15$  for **H**, **J**, **M**, **N** and **Q**, and  $n = 9$  for **R** and **S**. Scale bars in **A** and **I** are 1.0 cm; Scale bars in other panels: 100  $\mu$ m.

**Figure 3**

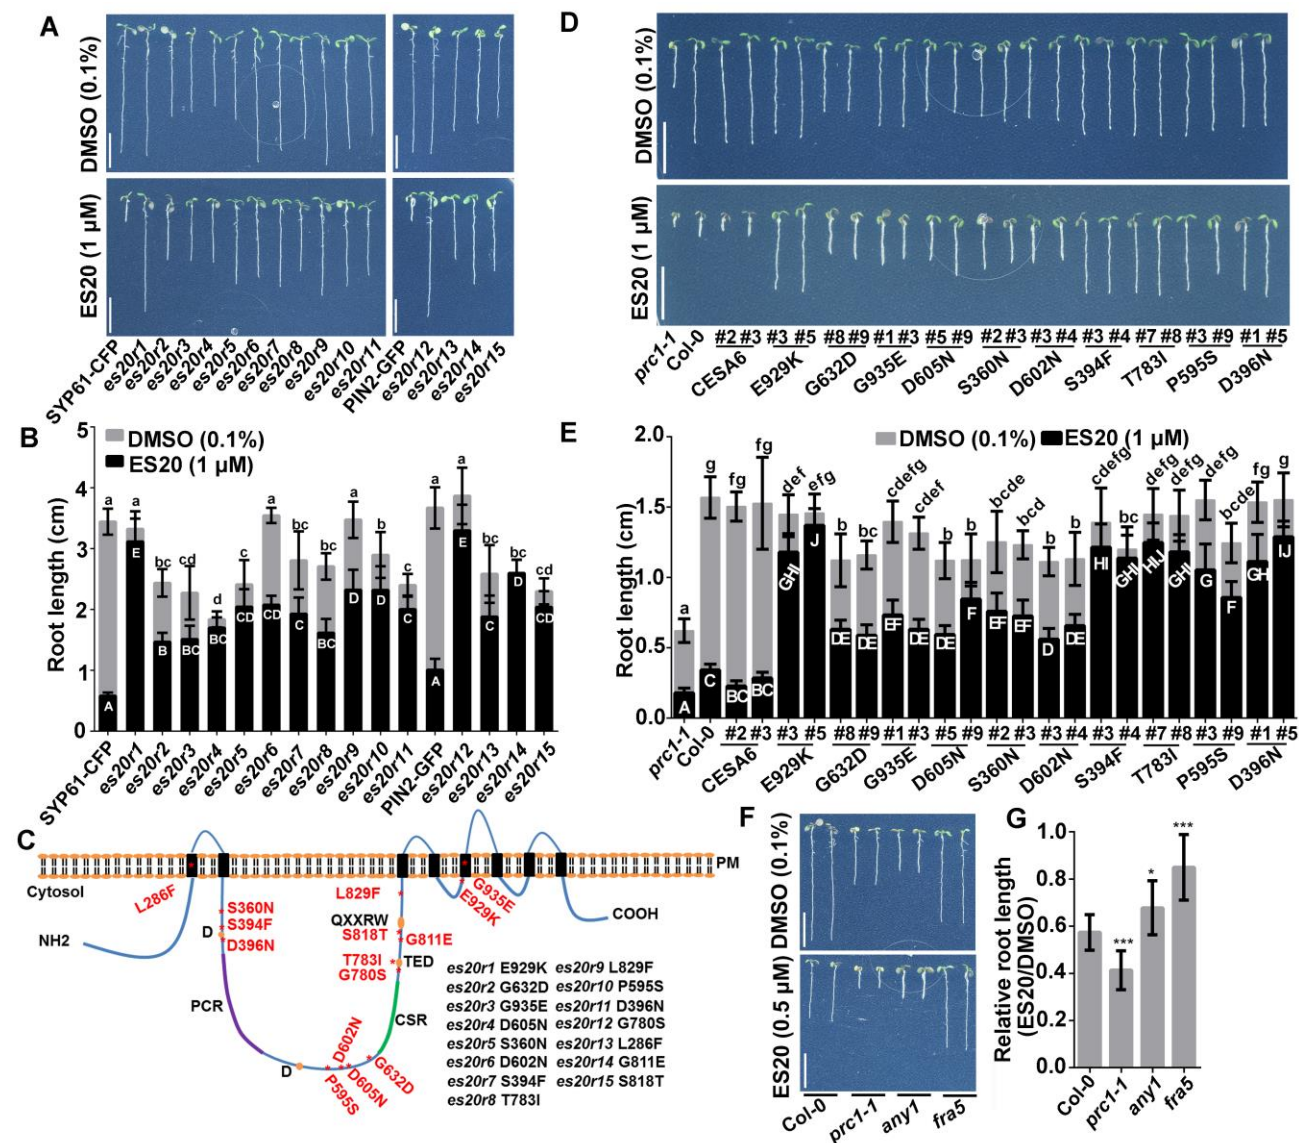

**Figure 3.** A novel collection of *cesa6* mutants have reduced sensitivity to ES20. **A**, Representative 7-day-old seedlings of wildtype expressing SYP61-CFP or PIN2-GFP, and *cesa6* mutant lines (*es20rs*) grown on media supplemented with 0.1% DMSO (top) or 1  $\mu$ M ES20 (bottom). **B**, Quantification of root length of seedlings from SYP61-CFP, PIN2-GFP, and *es20r* lines grown on media supplemented with 0.1% DMSO (gray) or 1  $\mu$ M ES20 (black). **C**, The diagram shows the predicted topology of CESA6 and the location of the mutated amino acid in each *es20r* allele. **D**, Genetic complementation of *prc1-1/cesa6* growth defects and sensitivity to ES20 by mutated CESA6 constructs. Ten constructs that we have tested rescued the root growth defect of *prc1-1* to different extents in the absence of ES20 and led to reduced sensitivity to ES20 in transgenic plants. **E**, Quantification on the root length of genetic complementation lines of *prc1-1/cesa6* by mutated CESA6 constructs and their



sensitivity to ES20 in growth. Ten constructs that we have tested rescued the root growth defect of *prc1-1* to different extents and led to reduced sensitivity to ES20 in transgenic plants. **F** and **G**, Mutations in other CESAs also led to reduced sensitivity to ES20. The letters in **B** and **E** indicate statistically significant differences determined by one-way ANOVA tests followed by Tukey's multiple comparison tests in different samples. Different letters indicate significant differences between groups ( $p < 0.05$ ). In **B** and **E**, lower- and upper-case letters represent ANOVA analysis of plants grown on media with DMSO and ES20, respectively. Scale bars: 1 cm. Error bars represent mean  $\pm$  SD,  $n = 12$  in **B**,  $n = 14$  in **E** and **G**. \* indicates  $p < 0.05$  and \*\*\* indicates  $p < 0.001$  by two-tailed student's *t* test in comparison with Col-0.

**Figure 4.**

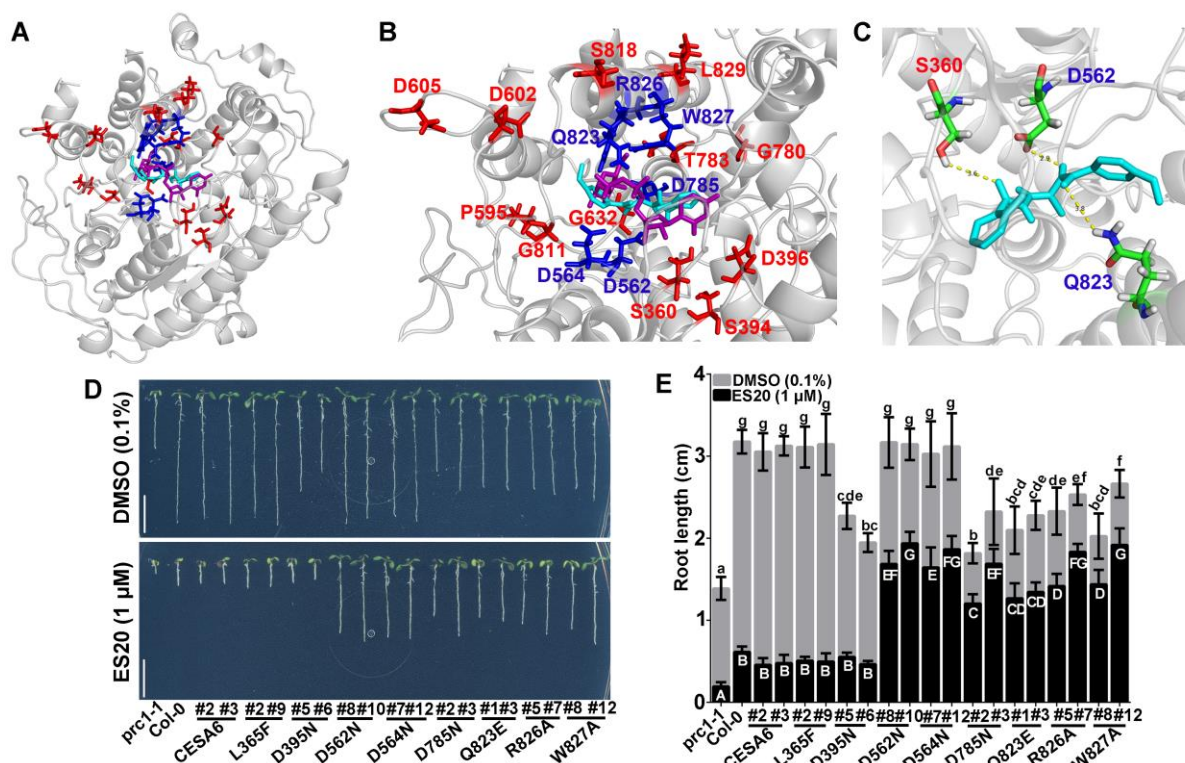

**Figure 4.** ES20 targets CESA6 at the catalytic site.

**A**, The superposition of ES20 (cyan) and UDP-glucose phosphonate (magenta) on the predicted binding pocket of modeled CESA6 large cytosolic domain (amino acids 322-868). The amino acids that were mutated in *es20r* mutants (red) and the predicted amino acids (blue) that caused reduced sensitivity to ES20 when mutated were shown as sticks. **B**, Magnified view of **(A)** at the predicted binding pocket for ES20 (cyan), UDP-glucose phosphonate (magenta) and amino acids that were required for ES20 sensitivity (red and blue). **C**, The possible hydrogen bonds that were predicted to form between ES20 and S360, D562, and Q823 of CESA6. ES20 was shown as sticks and colored in cyan. **D** and **E**, Mutation of six amino acids at the predicted binding site caused reduced sensitivity to ES20. The genomic construct for CESA6<sup>L365F</sup> completely rescued, whereas CESA6<sup>D395N</sup> partially rescued the growth of *prc1-1*, when compared to the wildtype CESA6 construct. The transgenic plants expressing CESA6<sup>L365F</sup> and CESA6<sup>D395N</sup> had similar levels of sensitivity to ES20 as those expressing wildtype CESA6. The genomic constructs of CESA6<sup>D562N</sup>, CESA6<sup>D564N</sup>, CESA6<sup>D785N</sup>, CESA6<sup>Q823E</sup>, CESA6<sup>R826A</sup>, and CESA6<sup>W827A</sup> rescued the growth of *prc1-1* to different extents and led to reduced sensitivity to ES20 in transgenic plants. The letters in **E** indicate statistically significant differences determined by one-way ANOVA tests followed by Tukey's multiple comparison tests in different samples. Different letters indicate significant differences between groups ( $p < 0.05$ ). In **E**, lower- and upper-case letters represent ANOVA analysis of plants grown on media with DMSO and ES20, respectively. Error bars: mean  $\pm$  SD, with  $n = 15$  in **E**. Scale bars: 1 cm.

**Figure 5.**

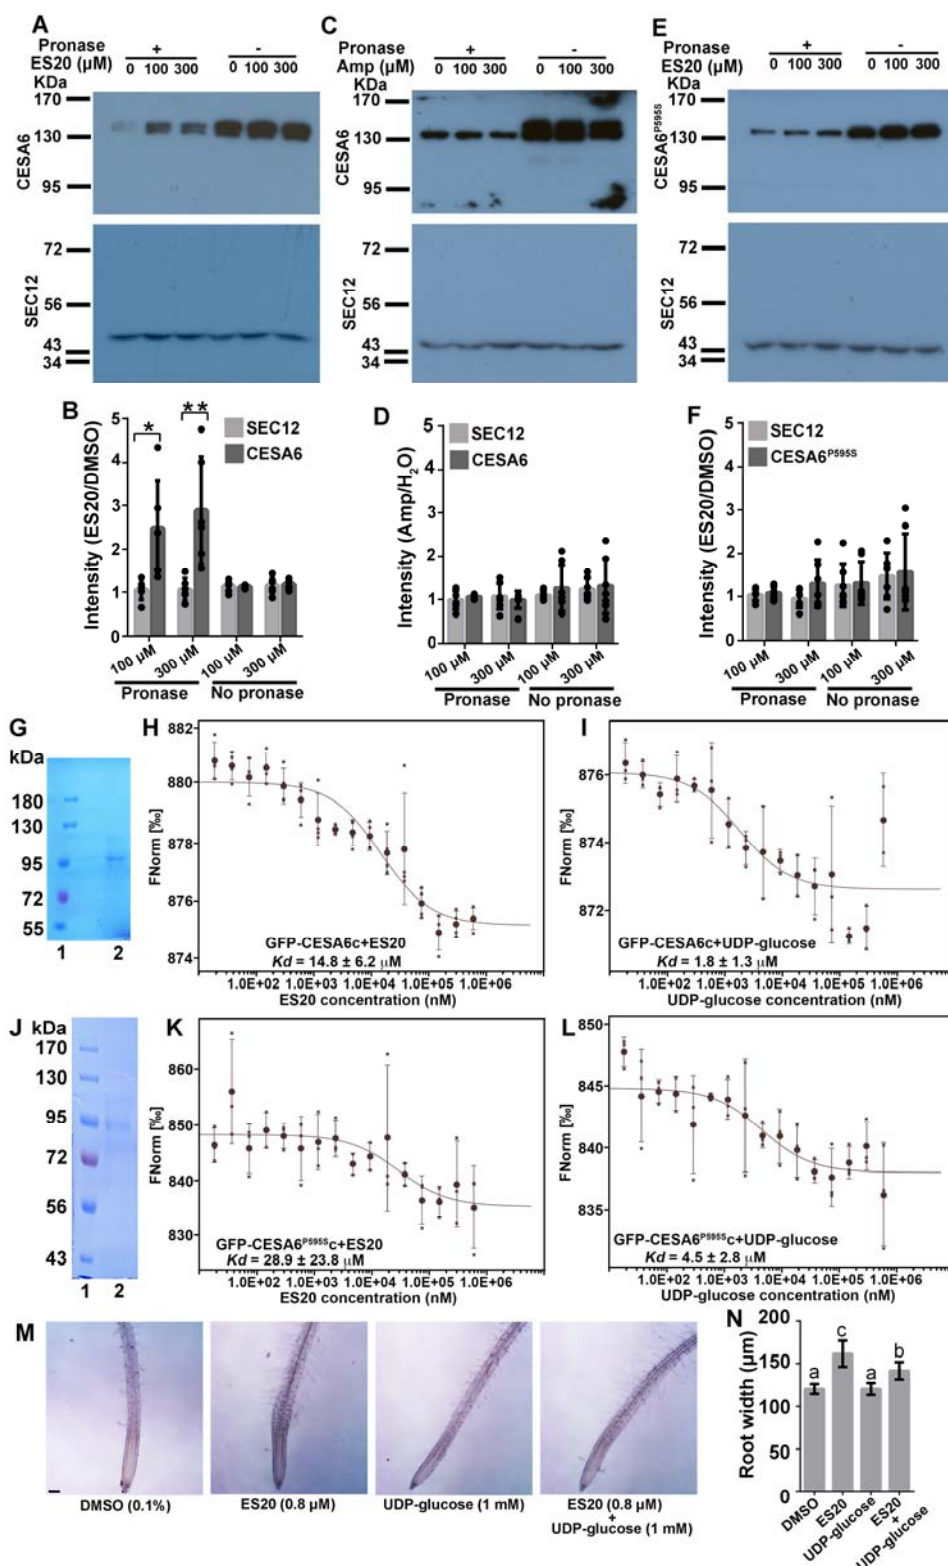

**Figure 5.** ES20 directly interacts with CESA6.

**A** to **F**, ES20 interacts with CESA6 in DARTS assay. **A**, **C**, and **E**, Representative western blots of DARTS assays for YFP-CESA6 with ES20 (**A**), YFP-CESA6 with

Ampicillin (**C**), and YFP-CESA6<sup>P595S</sup> with ES20 (**E**), respectively. **B**, **D**, and **F**, Quantitative analysis of DARTS assays for YFP-CESA6 with ES20 (**B**), YFP-CESA6 with Ampicillin (**D**), and YFP-CESA6<sup>P595S</sup> with ES20 (**F**), respectively. **G** to **I**, the central cytoplasmic domain of CESA6 interacts with ES20 and UDP-glucose in MST assay. **G**. Purified GFP-CESA6c with a His-SUMO tag (lane 2). **H**, Thermophoresis binding curve shows direct interaction between GFP-CESA6c and ES20. **I**, Thermophoresis binding curve shows direct interaction between GFP-CESA6c and UDP-glucose. **J** to **L**, the central cytoplasmic domain of CESA6<sup>P595S</sup> interacts with ES20 and UDP-glucose in MST assay. **J**. Purified GFP-CESA6<sup>P595S</sup>c with a His-SUMO tag (lane 2). **K**, Thermophoresis binding curve shows direct interaction between GFP-CESA6<sup>P595S</sup>c and ES20. **L**, Thermophoresis binding curve shows direct interaction between GFP-CESA6<sup>P595S</sup>c and UDP-glucose. **M** and **N**, UDP-glucose could partially complement the root swollen caused by ES20. **M**, Representative images of seedlings treated with DMSO (0.1%), ES20 (0.8  $\mu$ M), UDP-glucose (1 mM) and ES20 (0.8  $\mu$ M) + UDP-glucose (1 mM). **N**, Quantification on the root width at the elongation zone of seedlings with different treatments as shown in **M**. The letters in **N** indicate the statistically significant differences determined by one-way ANOVA tests followed by Tukey's multiple comparison tests in different samples. Different letters indicate significant differences between groups ( $p < 0.05$ ). Error bars: mean  $\pm$  SD, with  $n = 6$  in **B**, **D** and **F**,  $n = 3$  in **H**, **I**, **K** and **L**, and  $n = 16$  in **N**. In **B**, \* indicates  $p < 0.05$  and \*\* indicates  $p < 0.01$ , by two-tailed student's  $t$  test. Scale bar in **M**: 100  $\mu$ m.



**Figure 6.**

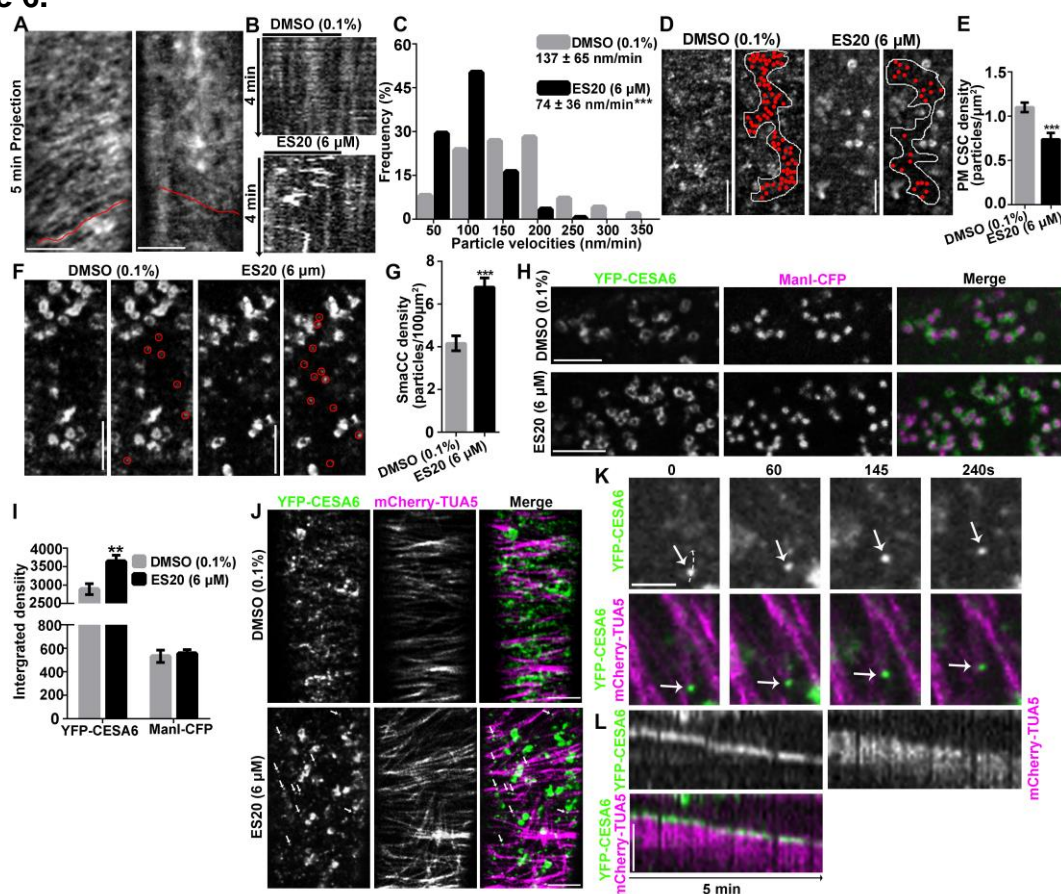

**Figure 6.** ES20 reduces CSC localization at the PM and increases CSC at the Golgi. **A to C**, ES20 reduced the velocity of CSCs at the PM. **A**, Representative time projections using average intensity images from a time-lapse series of YFP-CESA6 particles in root epidermal cells. **B**, Kymographs of trajectories marked in **(A)**. **C**, Histogram showed the frequencies of YFP-CESA6 particle velocity after treatment with 0.1% DMSO or 6 μM ES20 for 30 min. Data represent mean ± SD ( $n = 320$  CSC trajectories from 18 seedlings per treatment). **D** and **E**, ES20 reduced PM-localized YFP-CESA6 in root epidermal cells after ES20 treatment. Representative images (**D**) and quantification (**E**) of PM-localized YFP-CESA6 in root epidermal cells after 0.1% DMSO or 6 μM ES20 treatment were shown. Data represent mean ± SE ( $n = 20$  cells from 10 seedlings). **F** and **G**, The density of cortical SmaCCs, as indicated by red circles, was increased by ES20 treatment (30 min). Data represent mean ± SE ( $n = 20$  cells from 10 seedlings per treatment). **H** and **I**, ES20 increased the abundance of CSC at the Golgi. **H**, Representative images of Golgi-localized YFP-CESA6 and ManI-CFP after 0.1% DMSO (top) or 6 μM ES20 (bottom) treatment for 1 h. **I**, Quantification of integrated fluorescence intensity of Golgi-localized CSCs and ManI as described in **(H)**. Data represent mean ± SE ( $n = 60$  from 14 seedlings). **J**, CSCs were depleted from the PM after treatment with 6 μM ES20 for 2 h, whereas microtubule-associated CESA compartments accumulated, as indicated by white arrows. **K**, Magnified view on the association of CESA compartment (pointed by white arrows) with microtubules in time course image after 6 μM ES20 treatment for 2h. **L**, Kymograph image to show the

association of CESA compartment with the microtubules as shown in **K**. Scale bars, 5  $\mu\text{m}$ . \*\* indicates  $p < 0.01$  and \*\*\* indicates  $p < 0.001$  by two-tailed student's *t* test.

1 **Figure 7.**

2

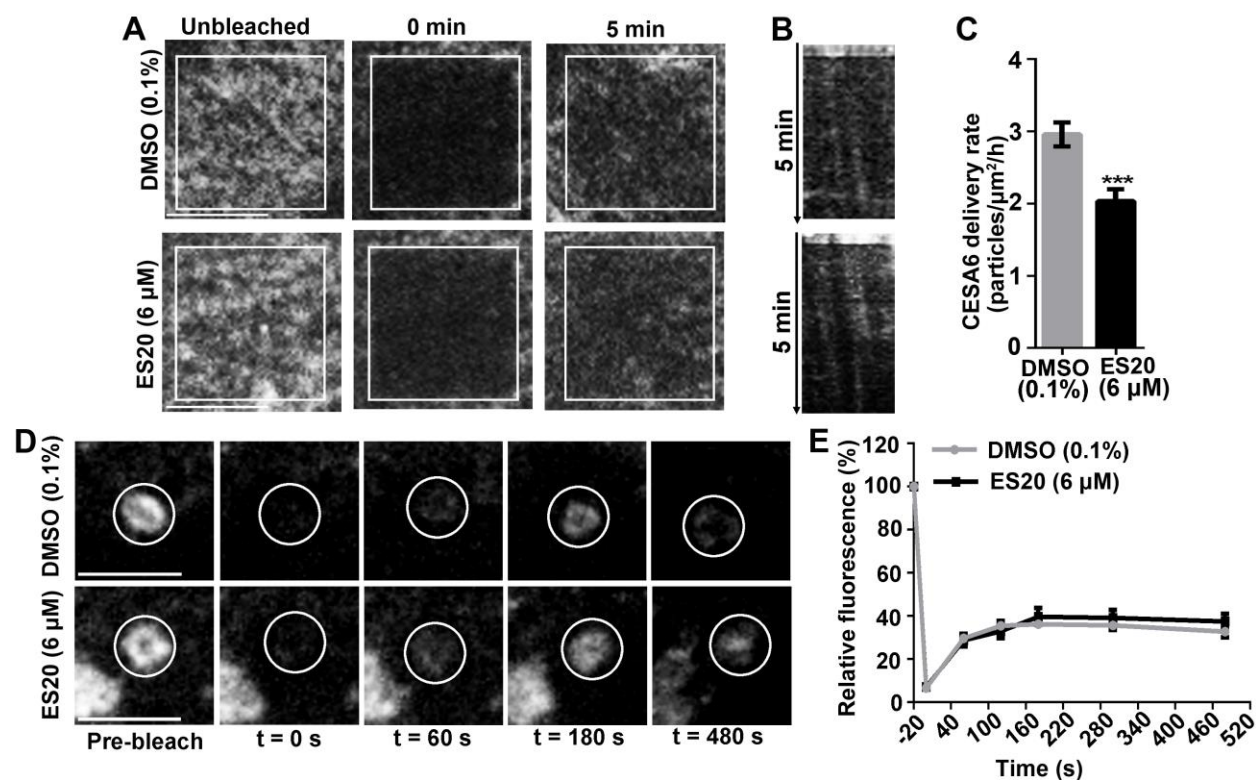

3  
4 **Figure 7.** ES20 treatment inhibits CSC delivery to the PM but does not affect CSC  
5 trafficking from ER to the Golgi.  
6 **A to C,** ES20 reduced the delivery rate of CSCs to PM in root epidermal cells. **A,**  
7 Representative images of CSCs at the PM during FRAP analysis. **B,** Representative  
8 kymographs of trajectories of newly delivered CSCs after photobleaching. **C.**  
9 Quantification of CSC delivery rates based on FRAP assays described in (**A**). Data  
10 represent mean  $\pm$  SE ( $n = 18$  ROI from 15 seedlings). **D** and **E,** ES20 did not affect the  
11 delivery of CSCs from ER to the Golgi in root epidermal cells. **D.** Representative images  
12 of Golgi-localized YFP-CESA6 during a FRAP assay. **E.** Quantification of the relative  
13 recovery of CSCs at Golgi at different time points during FRAP assay. Data represent  
14 mean  $\pm$  SE ( $n = 12$  from 12 seedlings per treatment). Scale bars: 5  $\mu$ m. \*\*\* indicates  $p <$   
15 0.001 by two-tailed student's  $t$  test.

16

1 **Figure 8.**

2

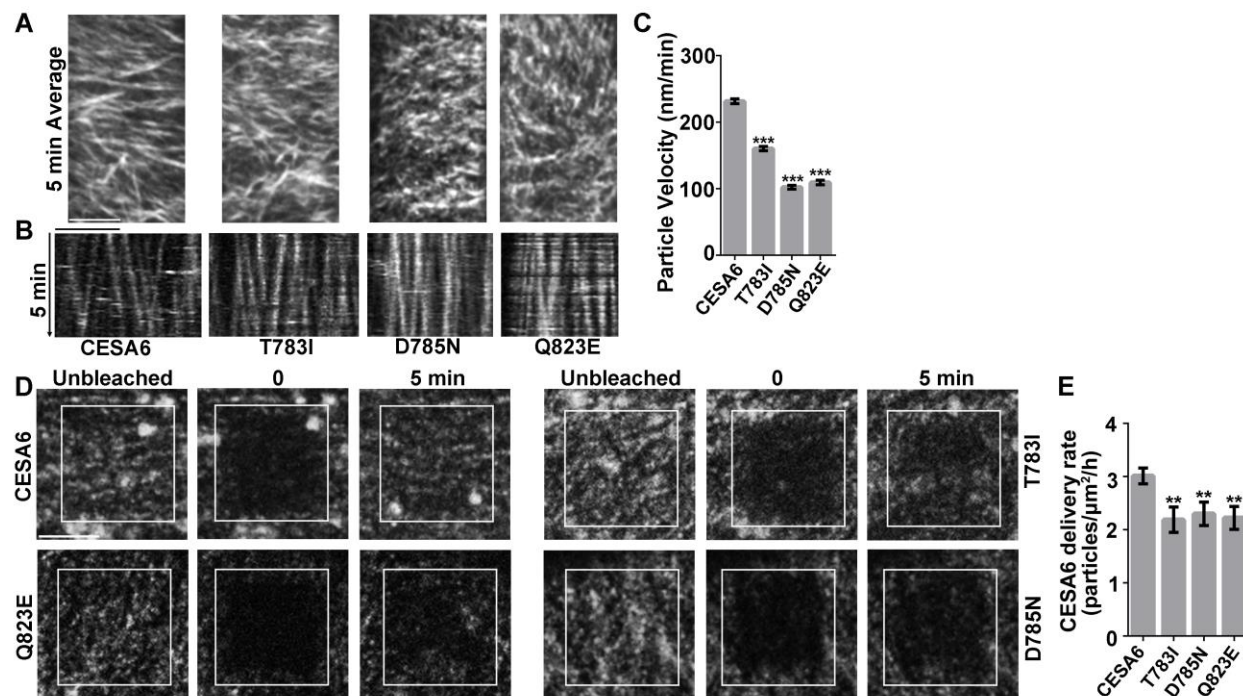

3

4

5 **Figure 8.** Mutations in amino acids at the catalytic site of CESA6 reduce CSC motility at

6 the PM and reduce CSC delivery to the PM in etiolated hypocotyl cells.

7 **A to C,** Mutations in amino acids at the catalytic site of CESA6 reduced the velocity of

8 CSCs at the PM. **A,** Representative time projections of average intensity images from a

9 time-lapse series of CSC particles from YFP-CESA6 lines carrying different mutations.

10 For each time projection, 61 frames collected at 5-s intervals were used. **B,**

11 Kymographs of trajectories marked in (**A**) showed the movement of CSCs over 5 min.

12 **C,** Quantification of the velocities of CSCs at the PM in YFP-CESA6 lines carrying

13 different mutations. Data represent mean  $\pm$  SE ( $n > 300$  CSC trajectories from 5

14 seedlings for each mutated line). \*\*\*,  $p < 0.001$  by two-tailed student's  $t$  test. **D and E,**

15 Mutations in amino acids at the catalytic site of CESA6 affect the delivery rate of CSCs

16 to PM. **D,** Representative images of CSCs at the PM during FRAP analysis in YFP-

17 CESA6 lines carrying different mutations. White boxes marked the ROI for

18 photobleaching. **E,** Quantification on CSC delivery rates based on FRAP assays

19 described in (**D**). Data represent mean  $\pm$  SE ( $n = 20$  ROIs from 10 seedlings). \*\*

20 represents  $p < 0.01$  by two-tailed student's  $t$  test. Scale bars in **A, B** and **D**: 5  $\mu\text{m}$ .

21

22



1 **Figure 9.**

2

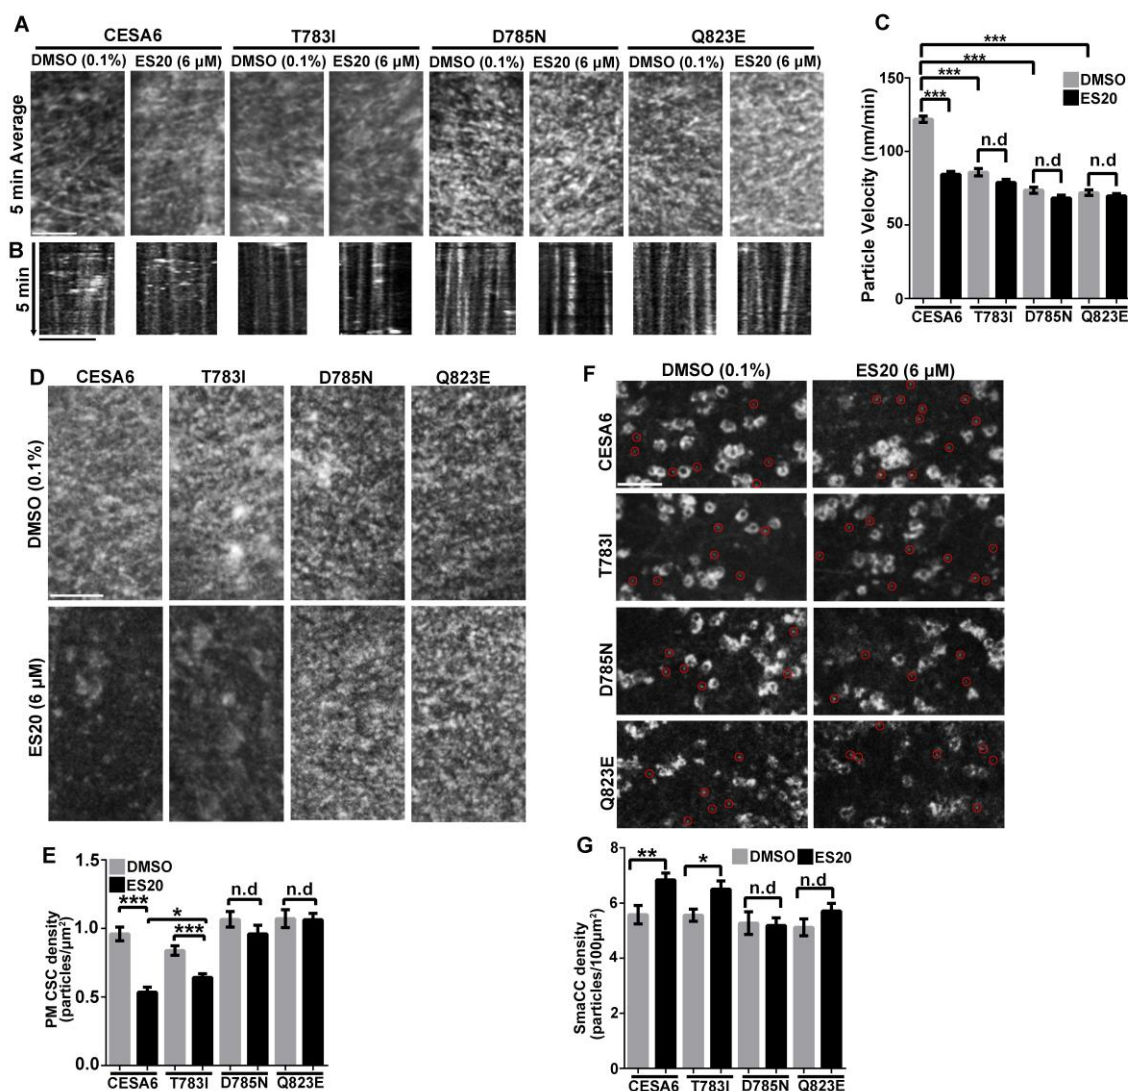

3

4

5 **Figure 9.** Mutations in amino acids at the catalytic site cause reduced sensitivity to

6 ES20 treatment at the cellular level in root epidermal cells.

7 **A to C,** Mutations in amino acids at the catalytic site of CESA6 reduced the sensitivity to

8 ES20 inhibition of CSC velocity. **A,** Representative time projections of average intensity

9 images from a time-lapse series of YFP-CESA6 particles from YFP-CESA6 lines

10 carrying different mutations after DMSO or ES20 treatment. For each time projection, 61

11 frames collected at 5-s intervals were used. **B,** Kymographs of trajectories marked in

12 **(A)** showed the movement of CSCs over 5 min. **C,** Quantification of the velocities of

13 CSCs at the PM in YFP-CESA6 lines carrying different mutations after ES20 treatment.

14 Data represent mean  $\pm$  SE ( $n > 300$  CSC trajectories from 6 seedlings for each mutated

15 line). **D and E,** Mutations in amino acids at the catalytic site of CESA6 cause reduced

16 sensitivity to ES20 inhibition of CSC density at the PM. Representative images **(D)** and

17 quantification of **(E)** of PM-localized YFP-CESA6 carrying different mutations in root

18 epidermal cells after 0.1% DMSO or 6  $\mu$ M ES20 treatment. Data represent mean  $\pm$  SE  
19 ( $n = 24$  cells from 12 seedlings). **F** and **G**, Some mutations in amino acids at the  
20 catalytic site of CESA6 cause reduced sensitivity to ES20 induction of cortical SmaCCs.  
21 The density of cortical SmaCCs was increased by ES20 treatment (30 min). Data  
22 represent mean  $\pm$  SE ( $n = 24$  cells from 12 seedlings). \* represents  $p < 0.05$ , \*\*  
23 represents  $p < 0.01$ , and \*\*\* represents  $p < 0.001$  by two-tailed student's t test. n.d  
24 represents no significant difference. Scale bars in **A**, **D** and **F**: 5  $\mu$ m.  
25

## Parsed Citations

**Alexander, N., Woetzel, N., and Meiler, J. (2011). bcl::Cluster : A method for clustering biological molecules coupled with visualization in the Pymol Molecular Graphics System. IEEE Int Conf Comput Adv Bio Med Sci 2011, 13-18.**

Pubmed: [Author and Title](#)

Google Scholar: [Author Only Title Only Author and Title](#)

**Arioli, T., Peng, L., Betzner, A.S., Burn, J., Wittke, W., Herth, W., Camilleri, C., Hofte, H., Plazinski, J., Birch, R., Cork, A., Glover, J., Redmond, J., and Williamson, R.E. (1998). Molecular analysis of cellulose biosynthesis in Arabidopsis. Science 279, 717-720.**

Pubmed: [Author and Title](#)

Google Scholar: [Author Only Title Only Author and Title](#)

**Austin, R.S., Vidaurre, D., Stamatiou, G., Breit, R., Provart, N.J., Bonetta, D., Zhang, J., Fung, P., Gong, Y., Wang, P.W., McCourt, P., and Guttman, D.S. (2011). Next-generation mapping of Arabidopsis genes. Plant J 67, 715-725.**

Pubmed: [Author and Title](#)

Google Scholar: [Author Only Title Only Author and Title](#)

**Bar-Peled, M., and Raikhel, N.V. (1997). Characterization of AtSEC12 and AtSAR1. Proteins likely involved in endoplasmic reticulum and Golgi transport. Plant Physiol 114, 315-324.**

Pubmed: [Author and Title](#)

Google Scholar: [Author Only Title Only Author and Title](#)

**Bashline, L., Li, S., and Gu, Y. (2014). The trafficking of the cellulose synthase complex in higher plants. Ann Bot 114, 1059-1067.**

Pubmed: [Author and Title](#)

Google Scholar: [Author Only Title Only Author and Title](#)

**Baskin, T.I., Wilson, J.E., Cork, A., and Williamson, R.E. (1994). Morphology and microtubule organization in Arabidopsis roots exposed to oryzalin or taxol. Plant Cell Physiol 35, 935-942.**

Pubmed: [Author and Title](#)

Google Scholar: [Author Only Title Only Author and Title](#)

**Brabham, C., Lei, L., Gu, Y., Stork, J., Barrett, M., and DeBolt, S. (2014). Indaziflam herbicidal action: a potent cellulose biosynthesis inhibitor. Plant Physiol 166, 1177-1185.**

Pubmed: [Author and Title](#)

Google Scholar: [Author Only Title Only Author and Title](#)

**Brett, C.T. (1978). Synthesis of beta-(1-->3)-Glucan from Extracellular Uridine Diphosphate Glucose as a Wound Response in Suspension-cultured Soybean Cells. Plant Physiol 62, 377-382.**

Pubmed: [Author and Title](#)

Google Scholar: [Author Only Title Only Author and Title](#)

**Brown, D.M., Zeef, L.A., Ellis, J., Goodacre, R., and Turner, S.R. (2005). Identification of novel genes in Arabidopsis involved in secondary cell wall formation using expression profiling and reverse genetics. Plant Cell 17, 2281-2295.**

Pubmed: [Author and Title](#)

Google Scholar: [Author Only Title Only Author and Title](#)

**Burn, J.E., Hocart, C.H., Birch, R.J., Cork, A.C., and Williamson, R.E. (2002). Functional analysis of the cellulose synthase genes CesA1, CesA2, and CesA3 in Arabidopsis. Plant Physiol 129, 797-807.**

Pubmed: [Author and Title](#)

Google Scholar: [Author Only Title Only Author and Title](#)

**Cano-Delgado, A., Penfield, S., Smith, C., Catley, M., and Bevan, M. (2003). Reduced cellulose synthesis invokes lignification and defense responses in Arabidopsis thaliana. Plant J 34, 351-362.**

Pubmed: [Author and Title](#)

Google Scholar: [Author Only Title Only Author and Title](#)

**Chin, R.M., Fu, X., Pai, M.Y., Vergnes, L., Hwang, H., Deng, G., Diep, S., Lomenick, B., Meli, V.S., Monsalve, G.C., Hu, E., Whelan, S.A., Wang, J.X., Jung, G., Solis, G.M., Fazlollahi, F., Kaweeteerawat, C., Quach, A., Nili, M., Krall, A.S., Godwin, H.A., Chang, H.R., Faull, K.F., Guo, F., Jiang, M., Trauger, S.A., Saghatelian, A., Braas, D., Christofk, H.R., Clarke, C.F., Teittel, M.A., Petrascheck, M., Reue, K., Jung, M.E., Frand, A.R., and Huang, J. (2014). The metabolite alpha-ketoglutarate extends lifespan by inhibiting ATP synthase and TOR. Nature 510, 397-401.**

Pubmed: [Author and Title](#)

Google Scholar: [Author Only Title Only Author and Title](#)

**Cho, M., Lee, S.H., and Cho, H.T. (2007). P-glycoprotein4 displays auxin efflux transporter-like action in Arabidopsis root hair cells and tobacco cells. Plant Cell 19, 3930-3943.**

Pubmed: [Author and Title](#)

Google Scholar: [Author Only Title Only Author and Title](#)

**Clough, S.J., and Bent, A.F. (1998). Floral dip: a simplified method for Agrobacterium-mediated transformation of Arabidopsis thaliana. Plant J 16, 735-743.**

Pubmed: [Author and Title](#)

Google Scholar: [Author Only Title Only Author and Title](#)

**Crowell, E.F., Bischoff, V., Desprez, T., Rolland, A., Stierhof, Y.D., Schumacher, K., Gonneau, M., Hofte, H., and Vernhettes, S. (2009). Pausing of Golgi bodies on microtubules regulates secretion of cellulose synthase complexes in Arabidopsis. *Plant Cell* 21, 1141-1154.**

Pubmed: [Author and Title](#)

Google Scholar: [Author Only Title Only Author and Title](#)

**Cutler, S.R., Ehrhardt, D.W., Griffiths, J.S., and Somerville, C.R. (2000). Random GFP::cDNA fusions enable visualization of subcellular structures in cells of Arabidopsis at a high frequency. *Proc Natl Acad Sci U S A* 97, 3718-3723.**

Pubmed: [Author and Title](#)

Google Scholar: [Author Only Title Only Author and Title](#)

**Dallakyan, S., and Olson, A.J. (2015). Small-molecule library screening by docking with PyRx. *Methods Mol Biol* 1263, 243-250.**

Pubmed: [Author and Title](#)

Google Scholar: [Author Only Title Only Author and Title](#)

**Daras, G., Rigas, S., Penning, B., Milioni, D., McCann, M.C., Carpita, N.C., Fasseas, C., and Hatzopoulos, P. (2009). The thanatos mutation in Arabidopsis thaliana cellulose synthase 3 (*AtCesA3*) has a dominant-negative effect on cellulose synthesis and plant growth. *New Phytol* 184, 114-126.**

Pubmed: [Author and Title](#)

Google Scholar: [Author Only Title Only Author and Title](#)

**DeBolt, S., Gutierrez, R., Ehrhardt, D.W., and Somerville, C. (2007a). Nonmotile cellulose synthase subunits repeatedly accumulate within localized regions at the plasma membrane in Arabidopsis hypocotyl cells following 2,6-dichlorobenzonitrile treatment. *Plant Physiol* 145, 334-338.**

Pubmed: [Author and Title](#)

Google Scholar: [Author Only Title Only Author and Title](#)

**DeBolt, S., Gutierrez, R., Ehrhardt, D.W., Melo, C.V., Ross, L., Cutler, S.R., Somerville, C., and Bonetta, D. (2007b). Morlin, an inhibitor of cortical microtubule dynamics and cellulose synthase movement. *Proc Natl Acad Sci U S A* 104, 5854-5859.**

Pubmed: [Author and Title](#)

Google Scholar: [Author Only Title Only Author and Title](#)

**Decker, D., Oberg, C., and Kleczkowski, L.A. (2017). Identification and characterization of inhibitors of UDP-glucose and UDP-sugar pyrophosphorylases for in vivo studies. *Plant J* 90, 1093-1107.**

Pubmed: [Author and Title](#)

Google Scholar: [Author Only Title Only Author and Title](#)

**Dejonghe, W., Sharma, I., Denoo, B., De Munck, S., Lu, Q., Mishev, K., Bulut, H., Myle, E., De Rycke, R., Vasileva, M., Savatin, D.V., Nerinckx, W., Staes, A., Drozdzecki, A., Audenaert, D., Yperman, K., Madder, A., Friml, J., Van Damme, D., Gevaert, K., Haucke, V., Savvides, S.N., Winne, J., and Russinova, E. (2019). Disruption of endocytosis through chemical inhibition of clathrin heavy chain function. *Nat Chem Biol* 15, 641-649.**

Pubmed: [Author and Title](#)

Google Scholar: [Author Only Title Only Author and Title](#)

**Desprez, T., Vernhettes, S., Fagard, M., Refregier, G., Desnos, T., Aletti, E., Py, N., Pelletier, S., and Hofte, H. (2002). Resistance against herbicide isoxaben and cellulose deficiency caused by distinct mutations in same cellulose synthase isoform *CESA6*. *Plant Physiol* 128, 482-490.**

Pubmed: [Author and Title](#)

Google Scholar: [Author Only Title Only Author and Title](#)

**Desprez, T., Juraniec, M., Crowell, E.F., Jouy, H., Pochylova, Z., Parcy, F., Hofte, H., Gonneau, M., and Vernhettes, S. (2007). Organization of cellulose synthase complexes involved in primary cell wall synthesis in Arabidopsis thaliana. *Proc Natl Acad Sci U S A* 104, 15572-15577.**

Pubmed: [Author and Title](#)

Google Scholar: [Author Only Title Only Author and Title](#)

**Dettmer, J., Hong-Hermesdorf, A., Stierhof, Y.D., and Schumacher, K. (2006). Vacuolar H<sup>+</sup>-ATPase activity is required for endocytic and secretory trafficking in Arabidopsis. *Plant Cell* 18, 715-730.**

Pubmed: [Author and Title](#)

Google Scholar: [Author Only Title Only Author and Title](#)

**Doblin, M.S., Kurek, I., Jacob-Wilk, D., and Delmer, D.P. (2002). Cellulose biosynthesis in plants: from genes to rosettes. *Plant Cell Physiol* 43, 1407-1420.**

Pubmed: [Author and Title](#)

Google Scholar: [Author Only Title Only Author and Title](#)

**Drakakaki, G., Robert, S., Szatmari, A.M., Brown, M.Q., Nagawa, S., Van Damme, D., Leonard, M., Yang, Z., Girke, T., Schmid, S.L., Russinova, E., Friml, J., Raikhel, N.V., and Hicks, G.R. (2011). Clusters of bioactive compounds target dynamic endomembrane networks in vivo. *Proc Natl Acad Sci U S A* 108, 17850-17855.**

Pubmed: [Author and Title](#)

Google Scholar: [Author Only Title Only Author and Title](#)

**Fagard, M., Desnos, T., Desprez, T., Goubet, F., Refregier, G., Mouille, G., McCann, M., Rayon, C., Vernhettes, S., and Hofte, H. (2000). PROCUSTE1 encodes a cellulose synthase required for normal cell elongation specifically in roots and dark-grown hypocotyls of Arabidopsis. *Plant Cell* 12, 2409-2424.**

Pubmed: [Author and Title](#)

Google Scholar: [Author Only Title Only Author and Title](#)

**Farquharson, K.L. (2009). Cortical microtubules regulate the insertion of cellulose synthase complexes in the plasma membrane. *Plant Cell* 21, 1028.**

Pubmed: [Author and Title](#)

Google Scholar: [Author Only Title Only Author and Title](#)

**Fernandes, A.N., Thomas, L.H., Altaner, C.M., Callow, P., Forsyth, V.T., Apperley, D.C., Kennedy, C.J., and Jarvis, M.C. (2011). Nanostructure of cellulose microfibrils in spruce wood. *Proc Natl Acad Sci U S A* 108, E1195-1203.**

Pubmed: [Author and Title](#)

Google Scholar: [Author Only Title Only Author and Title](#)

**Foster, C.E., Martin, T.M., and Pauly, M. (2010). Comprehensive compositional analysis of plant cell walls (lignocellulosic biomass) part II: carbohydrates. *J Vis Exp*.**

Pubmed: [Author and Title](#)

Google Scholar: [Author Only Title Only Author and Title](#)

**Fu, Y., Xu, T., Zhu, L., Wen, M., and Yang, Z. (2009). AROP GTPase signaling pathway controls cortical microtubule ordering and cell expansion in *Arabidopsis*. *Curr Biol* 19, 1827-1832.**

Pubmed: [Author and Title](#)

Google Scholar: [Author Only Title Only Author and Title](#)

**Fujita, M., Himmelspach, R., Ward, J., Whittington, A., Hasenbein, N., Liu, C., Truong, T.T., Galway, M.E., Mansfield, S.D., Hocart, C.H., and Wasteneys, G.O. (2013). The anisotropy1 D604N mutation in the *Arabidopsis* cellulose synthase1 catalytic domain reduces cell wall crystallinity and the velocity of cellulose synthase complexes. *Plant Physiol* 162, 74-85.**

Pubmed: [Author and Title](#)

Google Scholar: [Author Only Title Only Author and Title](#)

**Gardiner, J.C., Taylor, N.G., and Turner, S.R. (2003). Control of cellulose synthase complex localization in developing xylem. *Plant Cell* 15, 1740-1748.**

Pubmed: [Author and Title](#)

Google Scholar: [Author Only Title Only Author and Title](#)

**Geldner, N., Denervaud-Tendon, V., Hyman, D.L., Mayer, U., Stierhof, Y.D., and Chory, J. (2009). Rapid, combinatorial analysis of membrane compartments in intact plants with a multicolor marker set. *Plant J* 59, 169-178.**

Pubmed: [Author and Title](#)

Google Scholar: [Author Only Title Only Author and Title](#)

**Giddings, T.H., Jr., Brower, D.L., and Staehelin, L.A. (1980). Visualization of particle complexes in the plasma membrane of *Micrasterias denticulata* associated with the formation of cellulose fibrils in primary and secondary cell walls. *J Cell Biol* 84, 327-339.**

Pubmed: [Author and Title](#)

Google Scholar: [Author Only Title Only Author and Title](#)

**Gonneau, M., Desprez, T., Guillot, A., Vernhettes, S., and Hofte, H. (2014). Catalytic subunit stoichiometry within the cellulose synthase complex. *Plant Physiol* 166, 1709-1712.**

Pubmed: [Author and Title](#)

Google Scholar: [Author Only Title Only Author and Title](#)

**Gutierrez, R., Lindeboom, J.J., Paredez, A.R., Emons, A.M., and Ehrhardt, D.W. (2009). *Arabidopsis* cortical microtubules position cellulose synthase delivery to the plasma membrane and interact with cellulose synthase trafficking compartments. *Nat Cell Biol* 11, 797-806.**

Pubmed: [Author and Title](#)

Google Scholar: [Author Only Title Only Author and Title](#)

**Haigler, C.H., and Brown, R.M.J. (1986). Transport of rosettes from the Golgi apparatus to the plasma membrane in isolated mesophyll cells of *Zinnia elegans* during differentiation to tracheary elements in suspension culture. *Protoplasma* 134, 111-120.**

Pubmed: [Author and Title](#)

Google Scholar: [Author Only Title Only Author and Title](#)

**Harris, D.M., Corbin, K., Wang, T., Gutierrez, R., Bertolo, A.L., Petti, C., Smilgies, D.M., Estevez, J.M., Bonetta, D., Urbanowicz, B.R., Ehrhardt, D.W., Somerville, C.R., Rose, J.K., Hong, M., and Debolt, S. (2012). Cellulose microfibril crystallinity is reduced by mutating C-terminal transmembrane region residues CESA1A903V and CESA3T942I of cellulose synthase. *Proc Natl Acad Sci U S A* 109, 4098-4103.**

Pubmed: [Author and Title](#)

Google Scholar: [Author Only Title Only Author and Title](#)

**Heim, D.R., Roberts, J.L., Pike, P.D., and Larrinua, I.M. (1989). Mutation of a Locus of *Arabidopsis thaliana* Confers Resistance to the Herbicide Isoxaben. *Plant Physiol* 90, 146-150.**

Pubmed: [Author and Title](#)

Google Scholar: [Author Only Title Only Author and Title](#)

**Hill, J.L., Jr., Hammudi, M.B., and Tien, M. (2014). The *Arabidopsis* cellulose synthase complex: a proposed hexamer of CESA trimers in an equimolar stoichiometry. *Plant Cell* 26, 4834-4842.**

Pubmed: [Author and Title](#)

Google Scholar: [Author Only Title Only Author and Title](#)



Hu, Z., Zhang, T., Rombaut, D., Decaestecker, W., Xing, A., D'Haeyer, S., Hofer, R., Vercauteren, I., Karimi, M., Jacobs, T., and De Veylder, L. (2019). Genome Editing-Based Engineering of CESA3 Dual Cellulose-Inhibitor-Resistant Plants. *Plant Physiol* 180, 827-836.

Pubmed: [Author and Title](#)

Google Scholar: [Author Only Title Only Author and Title](#)

Hu, Z., Vanderhaeghen, R., Cools, T., Wang, Y., De Clercq, I., Leroux, O., Nguyen, L., Belt, K., Millar, A.H., Audenaert, D., Hilson, P., Small, I., Mouille, G., Vernhettes, S., Van Breusegem, F., Whelan, J., Hofte, H., and De Veylder, L. (2016). Mitochondrial Defects Confer Tolerance against Cellulose Deficiency. *Plant Cell* 28, 2276-2290.

Pubmed: [Author and Title](#)

Google Scholar: [Author Only Title Only Author and Title](#)

Kania, U., Nodzynski, T., Lu, Q., Hicks, G.R., Nerinckx, W., Mishev, K., Peurois, F., Cherfils, J., De Rycke, R., Grones, P., Robert, S., Russinova, E., and Friml, J. (2018). The Inhibitor Endosidin 4 Targets SEC7 Domain-Type ARF GTPase Exchange Factors and Interferes with Subcellular Trafficking in Eukaryotes. *Plant Cell* 30, 2553-2572.

Pubmed: [Author and Title](#)

Google Scholar: [Author Only Title Only Author and Title](#)

Kim, Y., Schumaker, K.S., and Zhu, J.K. (2006). EMS mutagenesis of Arabidopsis. *Methods Mol Biol* 323, 101-103.

Pubmed: [Author and Title](#)

Google Scholar: [Author Only Title Only Author and Title](#)

Laskowski, R.A., MacArthur, M.W., Moss, D.S., and Thornton, J.M. (1993). PROCHECK: a program to check the stereochemical quality of protein structures. *J. Appl. Cryst.* 26, 283-291.

Pubmed: [Author and Title](#)

Google Scholar: [Author Only Title Only Author and Title](#)

Laskowski, R.A., Rullmann, J.A., MacArthur, M.W., Kaptein, R., and Thornton, J.M. (1996). AQUA and PROCHECK-NMR: programs for checking the quality of protein structures solved by NMR. *J Biomol NMR* 8, 477-486.

Pubmed: [Author and Title](#)

Google Scholar: [Author Only Title Only Author and Title](#)

Lei, L., Singh, A., Bashline, L., Li, S., Yingling, Y.G., and Gu, Y. (2015). CELLULOSE SYNTHASE INTERACTIVE1 Is Required for Fast Recycling of Cellulose Synthase Complexes to the Plasma Membrane in Arabidopsis. *Plant Cell* 27, 2926-2940.

Pubmed: [Author and Title](#)

Google Scholar: [Author Only Title Only Author and Title](#)

Li, R., Rodriguez-Furlan, C., Wang, J., van de Ven, W., Gao, T., Raikhel, N.V., and Hicks, G.R. (2017). Different Endomembrane Trafficking Pathways Establish Apical and Basal Polarities. *Plant Cell* 29, 90-108.

Pubmed: [Author and Title](#)

Google Scholar: [Author Only Title Only Author and Title](#)

Li, S., Lei, L., Somerville, C.R., and Gu, Y. (2012). Cellulose synthase interactive protein 1 (CSI1) links microtubules and cellulose synthase complexes. *Proc Natl Acad Sci U S A* 109, 185-190.

Pubmed: [Author and Title](#)

Google Scholar: [Author Only Title Only Author and Title](#)

Li, S., Bashline, L., Zheng, Y., Xin, X., Huang, S., Kong, Z., Kim, S.H., Cosgrove, D.J., and Gu, Y. (2016). Cellulose synthase complexes act in a concerted fashion to synthesize highly aggregated cellulose in secondary cell walls of plants. *Proc Natl Acad Sci U S A* 113, 11348-11353.

Pubmed: [Author and Title](#)

Google Scholar: [Author Only Title Only Author and Title](#)

Lomenick, B., Hao, R., Jonai, N., Chin, R.M., Aghajan, M., Warburton, S., Wang, J., Wu, R.P., Gomez, F., Loo, J.A., Wohlschlegel, J.A., Vondriska, T.M., Pelletier, J., Herschman, H.R., Clardy, J., Clarke, C.F., and Huang, J. (2009). Target identification using drug affinity responsive target stability (DARTS). *Proc Natl Acad Sci U S A* 106, 21984-21989.

Pubmed: [Author and Title](#)

Google Scholar: [Author Only Title Only Author and Title](#)

Luo, Y., Scholl, S., Doering, A., Zhang, Y., Irani, N.G., Rubbo, S.D., Neumetzler, L., Krishnamoorthy, P., Van Houtte, I., Mylle, E., Bischoff, V., Vernhettes, S., Winne, J., Friml, J., Stierhof, Y.D., Schumacher, K., Persson, S., and Russinova, E. (2015). V-ATPase activity in the TGN/EE is required for exocytosis and recycling in Arabidopsis. *Nat Plants* 1, 15094.

Pubmed: [Author and Title](#)

Google Scholar: [Author Only Title Only Author and Title](#)

Matsushima, R., Kondo, M., Nishimura, M., and Hara-Nishimura, I. (2003). A novel ER-derived compartment, the ER body, selectively accumulates a beta-glucosidase with an ER-retention signal in Arabidopsis. *Plant J* 33, 493-502.

Pubmed: [Author and Title](#)

Google Scholar: [Author Only Title Only Author and Title](#)

McFarlane, H.E., Doring, A., and Persson, S. (2014). The cell biology of cellulose synthesis. *Annu Rev Plant Biol* 65, 69-94.

Pubmed: [Author and Title](#)

Google Scholar: [Author Only Title Only Author and Title](#)

Mishev, K., Lu, Q., Denoo, B., Peurois, F., Dejonghe, W., Hullaert, J., De Rycke, R., Boeren, S., Bretou, M., De Munck, S., Sharma, I.,

**Goodman, K., Kalinowska, K., Storme, V., Nguyen, L.S.L., Drozdzecki, A., Martins, S., Nerinckx, W., Audenaert, D., Vert, G., Madder, A., Otegui, M.S., Isono, E., Savvides, S.N., Annaert, W., De Vries, S., Cherfils, J., Winne, J., and Russinova, E. (2018). Nonselective Chemical Inhibition of Sec7 Domain-Containing ARF GTPase Exchange Factors. *Plant Cell* 30, 2573-2593.**

Pubmed: [Author and Title](#)

Google Scholar: [Author Only Title Only Author and Title](#)

**Montezinos, D., and Delmer, D.P. (1980). Characterization of inhibitors of cellulose synthesis in cotton fibers. *Planta* 148, 305-311.**

Pubmed: [Author and Title](#)

Google Scholar: [Author Only Title Only Author and Title](#)

**Morgan, J.L., Strumillo, J., and Zimmer, J. (2013). Crystallographic snapshot of cellulose synthesis and membrane translocation. *Nature* 493, 181-186.**

Pubmed: [Author and Title](#)

Google Scholar: [Author Only Title Only Author and Title](#)

**Morgan, J.L., McNamara, J.T., and Zimmer, J. (2014). Mechanism of activation of bacterial cellulose synthase by cyclic di-GMP. *Nat Struct Mol Biol* 21, 489-496.**

Pubmed: [Author and Title](#)

Google Scholar: [Author Only Title Only Author and Title](#)

**Morgan, J.L., McNamara, J.T., Fischer, M., Rich, J., Chen, H.M., Withers, S.G., and Zimmer, J. (2016). Observing cellulose biosynthesis and membrane translocation in crystallo. *Nature* 531, 329-334.**

Pubmed: [Author and Title](#)

Google Scholar: [Author Only Title Only Author and Title](#)

**Mueller, S.C., and Brown, R.M., Jr. (1980). Evidence for an intramembrane component associated with a cellulose microfibril-synthesizing complex in higher plants. *J Cell Biol* 84, 315-326.**

Pubmed: [Author and Title](#)

Google Scholar: [Author Only Title Only Author and Title](#)

**Mueller, S.C., Brown, R.M., Jr., and Scott, T.K. (1976). Cellulosic microfibrils: nascent stages of synthesis in a higher plant cell. *Science* 194, 949-951.**

Pubmed: [Author and Title](#)

Google Scholar: [Author Only Title Only Author and Title](#)

**Newman, R.H., Hill, S.J., and Harris, P.J. (2013). Wide-angle x-ray scattering and solid-state nuclear magnetic resonance data combined to test models for cellulose microfibrils in mung bean cell walls. *Plant Physiol* 163, 1558-1567.**

Pubmed: [Author and Title](#)

Google Scholar: [Author Only Title Only Author and Title](#)

**Nixon, B.T., Mansouri, K., Singh, A., Du, J., Davis, J.K., Lee, J.G., Slabaugh, E., Vandavasi, V.G., O'Neill, H., Roberts, E.M., Roberts, A.W., Yingling, Y.G., and Haigler, C.H. (2016). Comparative Structural and Computational Analysis Supports Eighteen Cellulose Synthases in the Plant Cellulose Synthesis Complex. *Sci Rep* 6, 28696.**

Pubmed: [Author and Title](#)

Google Scholar: [Author Only Title Only Author and Title](#)

**Omadjela, O., Narahari, A., Strumillo, J., Melida, H., Mazur, O., Bulone, V., and Zimmer, J. (2013). BcsA and BcsB form the catalytically active core of bacterial cellulose synthase sufficient for in vitro cellulose synthesis. *Proc Natl Acad Sci U S A* 110, 17856-17861.**

Pubmed: [Author and Title](#)

Google Scholar: [Author Only Title Only Author and Title](#)

**Paredes, A.R., Somerville, C.R., and Ehrhardt, D.W. (2006). Visualization of cellulose synthase demonstrates functional association with microtubules. *Science* 312, 1491-1495.**

Pubmed: [Author and Title](#)

Google Scholar: [Author Only Title Only Author and Title](#)

**Park, J.I., Ishimizu, T., Suwabe, K., Sudo, K., Masuko, H., Hakozaiki, H., Nou, I.S., Suzuki, G., and Watanabe, M. (2010). UDP-glucose pyrophosphorylase is rate limiting in vegetative and reproductive phases in *Arabidopsis thaliana*. *Plant Cell Physiol* 51, 981-996.**

Pubmed: [Author and Title](#)

Google Scholar: [Author Only Title Only Author and Title](#)

**Park, S., Song, B., Shen, W., and Ding, S.Y. (2019). A mutation in the catalytic domain of Cellulose synthase 6 halts its transport to the Golgi apparatus. *J Exp Bot*.**

Pubmed: [Author and Title](#)

Google Scholar: [Author Only Title Only Author and Title](#)

**Pear, J.R., Kawagoe, Y., Schreckengost, W.E., Delmer, D.P., and Stalker, D.M. (1996). Higher plants contain homologs of the bacterial celA genes encoding the catalytic subunit of cellulose synthase. *Proc Natl Acad Sci U S A* 93, 12637-12642.**

Pubmed: [Author and Title](#)

Google Scholar: [Author Only Title Only Author and Title](#)

**Persson, S., Paredes, A., Carroll, A., Palsdottir, H., Doblin, M., Poindexter, P., Khitrov, N., Auer, M., and Somerville, C.R. (2007). Genetic evidence for three unique components in primary cell-wall cellulose synthase complexes in *Arabidopsis*. *Proc Natl Acad Sci U S A* 104, 15566-15571.**



Pubmed: [Author and Title](#)

Google Scholar: [Author Only Title Only Author and Title](#)

**Polko, J.K., Barnes, W.J., Voiniciuc, C., Doctor, S., Steinwand, B., Hill, J.L., Jr., Tien, M., Pauly, M., Anderson, C.T., and Kieber, J.J. (2018). SHOU4 Proteins Regulate Trafficking of Cellulose Synthase Complexes to the Plasma Membrane. *Curr Biol* 28, 3174-3182 e3176.**

Pubmed: [Author and Title](#)

Google Scholar: [Author Only Title Only Author and Title](#)

**Pradhan Mitra, P., and Loque, D. (2014). Histochemical staining of Arabidopsis thaliana secondary cell wall elements. *J Vis Exp*.**

Pubmed: [Author and Title](#)

Google Scholar: [Author Only Title Only Author and Title](#)

**Qu, Y., Gharbi, N., Yuan, X., Olsen, J.R., Blicher, P., Dalhus, B., Brokstad, K.A., Lin, B., Oyan, A.M., Zhang, W., Kalland, K.H., and Ke, X. (2016). Axitinib blocks Wnt/beta-catenin signaling and directs asymmetric cell division in cancer. *Proc Natl Acad Sci U S A* 113, 9339-9344.**

Pubmed: [Author and Title](#)

Google Scholar: [Author Only Title Only Author and Title](#)

**Rodriguez-Furlan, C., Domozych, D., Qian, W., Enquist, P.A., Li, X., Zhang, C., Schenk, R., Winbigler, H.S., Jackson, W., Raikhel, N.V., and Hicks, G.R. (2019). Interaction between VPS35 and RABG3f is necessary as a checkpoint to control fusion of late compartments with the vacuole. *Proc Natl Acad Sci U S A* 116, 21291-21301.**

Pubmed: [Author and Title](#)

Google Scholar: [Author Only Title Only Author and Title](#)

**Roy, A., Kucukural, A., and Zhang, Y. (2010). I-TASSER: a unified platform for automated protein structure and function prediction. *Nat Protoc* 5, 725-738.**

Pubmed: [Author and Title](#)

Google Scholar: [Author Only Title Only Author and Title](#)

**Sampathkumar, A., Gutierrez, R., McFarlane, H.E., Bringmann, M., Lindeboom, J., Emons, A.M., Samuels, L., Ketelaar, T., Ehrhardt, D.W., and Persson, S. (2013). Patterning and lifetime of plasma membrane-localized cellulose synthase is dependent on actin organization in Arabidopsis interphase cells. *Plant Physiol* 162, 675-688.**

Pubmed: [Author and Title](#)

Google Scholar: [Author Only Title Only Author and Title](#)

**Scheible, W.R., Eshed, R., Richmond, T., Delmer, D., and Somerville, C. (2001). Modifications of cellulose synthase confer resistance to isoxaben and thiazolidinone herbicides in Arabidopsis *lrx1* mutants. *Proc Natl Acad Sci U S A* 98, 10079-10084.**

Pubmed: [Author and Title](#)

Google Scholar: [Author Only Title Only Author and Title](#)

**Schindelin, J., Arganda-Carreras, I., Frise, E., Kaynig, V., Longair, M., Pietzsch, T., Preibisch, S., Rueden, C., Saalfeld, S., Schmid, B., Tinevez, J.Y., White, D.J., Hartenstein, V., Eliceiri, K., Tomancak, P., and Cardona, A. (2012). Fiji: an open-source platform for biological-image analysis. *Nat Methods* 9, 676-682.**

Pubmed: [Author and Title](#)

Google Scholar: [Author Only Title Only Author and Title](#)

**Sethaphong, L., Haigler, C.H., Kubicki, J.D., Zimmer, J., Bonetta, D., DeBolt, S., and Yingling, Y.G. (2013). Tertiary model of a plant cellulose synthase. *Proc Natl Acad Sci U S A* 110, 7512-7517.**

Pubmed: [Author and Title](#)

Google Scholar: [Author Only Title Only Author and Title](#)

**Slabaugh, E., Sethaphong, L., Xiao, C., Amick, J., Anderson, C.T., Haigler, C.H., and Yingling, Y.G. (2014). Computational and genetic evidence that different structural conformations of a non-catalytic region affect the function of plant cellulose synthase. *J Exp Bot* 65, 6645-6653.**

Pubmed: [Author and Title](#)

Google Scholar: [Author Only Title Only Author and Title](#)

**Susette, M.C., and Gordon, M.M. (1983). Radioautographic visualization of  $\beta$ -glucans formed by pea membranes from UDP-glucose. *Canadian Journal of Botany* 61, 1266-1275.**

Pubmed: [Author and Title](#)

Google Scholar: [Author Only Title Only Author and Title](#)

**Tateno, M., Brabham, C., and DeBolt, S. (2016). Cellulose biosynthesis inhibitors - a multifunctional toolbox. *J Exp Bot* 67, 533-542.**

Pubmed: [Author and Title](#)

Google Scholar: [Author Only Title Only Author and Title](#)

**Taylor, N.G., Howells, R.M., Huttly, A.K., Vickers, K., and Turner, S.R. (2003). Interactions among three distinct CesA proteins essential for cellulose synthesis. *Proc Natl Acad Sci U S A* 100, 1450-1455.**

Pubmed: [Author and Title](#)

Google Scholar: [Author Only Title Only Author and Title](#)

**Thevenaz, P., Ruttimann, U.E., and Unser, M. (1998). A pyramid approach to subpixel registration based on intensity. *IEEE Trans Image Process* 7, 27-41.**

Pubmed: [Author and Title](#)

Google Scholar: [Author Only](#) [Title Only](#) [Author and Title](#)

**Tran, M.L., McCarthy, T.W., Sun, H., Wu, S.Z., Norris, J.H., Bezanilla, M., Vidali, L., Anderson, C.T., and Roberts, A.W. (2018). Direct observation of the effects of cellulose synthesis inhibitors using live cell imaging of Cellulose Synthase (CESA) in *Physcomitrella patens*. *Sci Rep* 8, 735.**

Pubmed: [Author and Title](#)

Google Scholar: [Author Only](#) [Title Only](#) [Author and Title](#)

**Trott, O., and Olson, A.J. (2010). AutoDock Vina: improving the speed and accuracy of docking with a new scoring function, efficient optimization, and multithreading. *J Comput Chem* 31, 455-461.**

Pubmed: [Author and Title](#)

Google Scholar: [Author Only](#) [Title Only](#) [Author and Title](#)

**Updegraff, D.M. (1969). Semimicro determination of cellulose in biological materials. *Anal Biochem* 32, 420-424.**

Pubmed: [Author and Title](#)

Google Scholar: [Author Only](#) [Title Only](#) [Author and Title](#)

**Vergara, C.E., and Carpita, N.C. (2001). Beta-D-glycan synthases and the CesaA gene family: lessons to be learned from the mixed-linkage (1 $\rightarrow$ 3),(1 $\rightarrow$ 4)beta-D-glucan synthase. *Plant Mol Biol* 47, 145-160.**

Pubmed: [Author and Title](#)

Google Scholar: [Author Only](#) [Title Only](#) [Author and Title](#)

**Worden, N., Wilkop, T.E., Esteve, V.E., Jeannotte, R., Lathe, R., Vernhettes, S., Weimer, B., Hicks, G., Alonso, J., Labavitch, J., Persson, S., Ehrhardt, D., and Drakakaki, G. (2015). CESA trafficking inhibitor inhibits cellulose deposition and interferes with the trafficking of cellulose synthase complexes and their associated proteins KORRIGAN1 and POM2/CELLULOSE SYNTHASE INTERACTIVE PROTEIN1. *Plant Physiol* 167, 381-393.**

Pubmed: [Author and Title](#)

Google Scholar: [Author Only](#) [Title Only](#) [Author and Title](#)

**Xu, J., and Scheres, B. (2005). Dissection of *Arabidopsis* ADP-RIBOSYLATION FACTOR 1 function in epidermal cell polarity. *Plant Cell* 17, 525-536.**

Pubmed: [Author and Title](#)

Google Scholar: [Author Only](#) [Title Only](#) [Author and Title](#)

**Yang, J., Roy, A., and Zhang, Y. (2013a). Protein-ligand binding site recognition using complementary binding-specific substructure comparison and sequence profile alignment. *Bioinformatics* 29, 2588-2595.**

Pubmed: [Author and Title](#)

Google Scholar: [Author Only](#) [Title Only](#) [Author and Title](#)

**Yang, J., Roy, A., and Zhang, Y. (2013b). BioLiP: a semi-manually curated database for biologically relevant ligand-protein interactions. *Nucleic Acids Res* 41, D1096-1103.**

Pubmed: [Author and Title](#)

Google Scholar: [Author Only](#) [Title Only](#) [Author and Title](#)

**Yang, J., Yan, R., Roy, A., Xu, D., Poisson, J., and Zhang, Y. (2015). The I-TASSER Suite: protein structure and function prediction. *Nat Methods* 12, 7-8.**

Pubmed: [Author and Title](#)

Google Scholar: [Author Only](#) [Title Only](#) [Author and Title](#)

**Zhang, C., Brown, M.Q., van de Ven, W., Zhang, Z.M., Wu, B., Young, M.C., Synek, L., Borchardt, D., Harrison, R., Pan, S., Luo, N., Huang, Y.M., Ghang, Y.J., Ung, N., Li, R., Isley, J., Morikis, D., Song, J., Guo, W., Hooley, R.J., Chang, C.E., Yang, Z., Zarsky, V., Muday, G.K., Hicks, G.R., and Raikhel, N.V. (2016a). Endosidin2 targets conserved exocyst complex subunit EXO70 to inhibit exocytosis. *Proc Natl Acad Sci U S A* 113, E41-50.**

Pubmed: [Author and Title](#)

Google Scholar: [Author Only](#) [Title Only](#) [Author and Title](#)

**Zhang, W., Cai, C., and Staiger, C.J. (2019). Myosins XI Are Involved in Exocytosis of Cellulose Synthase Complexes. *Plant Physiol*.**

Pubmed: [Author and Title](#)

Google Scholar: [Author Only](#) [Title Only](#) [Author and Title](#)

**Zhang, Y., Nikolovski, N., Sorieul, M., Velloso, T., McFarlane, H.E., Dupree, R., Kesten, C., Schneider, R., Driemeier, C., Lathe, R., Lampugnani, E., Yu, X., Ivakov, A., Doblin, M.S., Mortimer, J.C., Brown, S.P., Persson, S., and Dupree, P. (2016b). Golgi-localized STELLO proteins regulate the assembly and trafficking of cellulose synthase complexes in *Arabidopsis*. *Nat Commun* 7, 11656.**

Pubmed: [Author and Title](#)

Google Scholar: [Author Only](#) [Title Only](#) [Author and Title](#)

**Zhong, R., Morrison, W.H., 3rd, Freshour, G.D., Hahn, M.G., and Ye, Z.H. (2003). Expression of a mutant form of cellulose synthase *AtCesA7* causes dominant negative effect on cellulose biosynthesis. *Plant Physiol* 132, 786-795.**

Pubmed: [Author and Title](#)

Google Scholar: [Author Only](#) [Title Only](#) [Author and Title](#)

**Zhu, X., Li, S., Pan, S., Xin, X., and Gu, Y. (2018). CS11, PATROL1, and exocyst complex cooperate in delivery of cellulose synthase complexes to the plasma membrane. *Proc Natl Acad Sci U S A* 115, E3578-E3587.**

Pubmed: [Author and Title](#)

Google Scholar: [Author Only](#) [Title Only](#) [Author and Title](#)

**Zou, M., Ren, H., and Li, J. (2019). An Auxin Transport Inhibitor Targets Villin-Mediated Actin Dynamics to Regulate Polar Auxin Transport. *Plant Physiol* 181, 161-178.**

Pubmed: [Author and Title](#)

Google Scholar: [Author Only](#) [Title Only](#) [Author and Title](#)
